# Supplementary material for: The compact genome of the sponge Oopsacas minuta (Hexactinellida) is lacking key metazoan core genes
Source: PubMed Central journal article supplement (PMC10280926; doi:10.1186/s12915-023-01619-w), 2023-06-19
Supplement: 12915_2023_1619_MOESM1_ESM.pdf [file 12915_2023_1619_MOESM1_ESM.pdf]

## **Additional File 1 Index**

**Table S1** : *Main features and taxonomic assignment of Oosacac minuta's metagenome assembly*

**Table S2** : *Taxonomic assignment of non-Eukaryotic and non-Archaeal Taxa*

**Figure S1** : *Phylogenetic position of the main microbial species associated with O. minuta*

**Table S3** : *Genome features of Candidatus Cenarchaeum massiliensis compared to other Thaumarchaea.*

**Table S4** : *Annotation of the predicted protein-coding genes of Ca. C. massiliensis*

**Figure S2** : *Characterization of the genome of Ca. C. massiliensis*

**Figure S3** : *The cobalamin synthesis genes in Thaumarchaeota.*

**Figure S4** : *Localization of Ca. C. massiliensis in the tissues of O. minuta by Card-FISH*

**Table S1: Main features and taxonomic assignment of *Oopsacas minuta*'s metagenome assembly.**

Scaffolds (>1kb) were retained and submitted to MetaGeneMark (Zhu et al, 2010)

followed by a blastp search (Altschul et al, 1990) strategy against NR (best hits with evalue < 10<sup>-5</sup>). A LCA-like method computed over all annotated genes was applied on each scaffold:

the taxonomy assigned to each scaffold corresponds to that found for at least half of the genes composing the scaffold.

Scaffolds were then classified into 5 groups: Eukaryota, Bacteria, Archaea, virus and Not Assigned taxa.

| Taxa                    | Mapped Reads | % of total reads | Mean Coverage | Total length (bp) | % of total assembly | Contigs > 1kb | polished scaffolds | Polished scaffold mean coverage | Reference ID    |
|-------------------------|--------------|------------------|---------------|-------------------|---------------------|---------------|--------------------|---------------------------------|-----------------|
| <b>Eukaryota</b>        |              |                  |               |                   |                     |               |                    |                                 |                 |
| Porifera nuclear genome | 111941409    | 77.95            | 177           | 61170773          | 95.91               | 936           | 365                | 186                             | JAKMXF010000000 |
| Mitochondria            | 89460        | 0.06             | 455           | 19518             | 0.03                | 1             | 1                  | 455                             | NC_027419.1     |
| <b>Archae</b>           |              |                  |               |                   |                     |               |                    |                                 |                 |
| mainly Thaumarcheota    | 26189162     | 18.24            | 1537          | 1658688           | 2.60                | 50            | 11                 | 1206                            | JAJIZT010000000 |
| <b>Bacteria</b>         |              |                  |               |                   |                     |               |                    |                                 |                 |
| Gamma proteobacteria    | 3762639      | 2.62             | 657           | 555205            | 0.87                | 44            |                    |                                 |                 |
| other-Proteobacteria    | 454494       | 0.32             | 759           | 54400             | 0.09                | 13            |                    |                                 |                 |
| Cyanobacteria           | 79313        | 0.06             | 104           | 75563             | 0.12                | 17            |                    |                                 |                 |
| Firmicutes              | 33314        | 0.02             | 92            | 36020             | 0.06                | 10            |                    |                                 |                 |
| other-bacteria          | 71121        | 0.05             | 127           | 55808             | 0.09                | 14            |                    |                                 |                 |
| NA*-bacteria            | 344951       | 0.24             | 468           | 71964             | 0.11                | 9             |                    |                                 |                 |
| <b>Virus</b>            | 633133       | 0.44             | 778           | 81222             | 0.13                | 2             |                    |                                 |                 |
| <b>Ambiguous-taxa</b>   | 2037432      | 1.42             | 1124          | 164832            | 0.26                | 33            |                    |                                 |                 |
| <b>NA*-Taxa</b>         | 3888087      | 2.71             | 241           | 1525204           | 2.39                | 630           |                    |                                 |                 |
| <b>TOTAL</b>            | 143598996    |                  | 220**         | 63779161          |                     | 1096          |                    |                                 |                 |

All statistics were collected before final scaffolding and polishing and only for contigs > 1 kbp

the total number of raw reads is: 395 851 746 (197 925 873 pairs)

\* NA= Not Assigned

**Table S2: Taxonomic assignment of non-Eukaryotic and non-Archaeal Taxa**

Scaffolds >1kb have been submitted to MetaGeneMark followed by a blastp search against NR (best hits with evalue < 10<sup>-5</sup>) A LCA-like method computed over all annotated genes was applied on each scaffold: the taxonomy assigned to each scaffold corresponds to that found for at least half of the genes composing the scaffold. Scaffolds were then classified into 5 groups: Eukaryota, Bacteria, Archaea, virus and Not Assigned taxa.

| number of scaffolds |                                   | Taxonomic assignment              |                                   |                               |                           |                                                             |
|---------------------|-----------------------------------|-----------------------------------|-----------------------------------|-------------------------------|---------------------------|-------------------------------------------------------------|
| 1                   | Bacteria Aquificae                | Aquificae                         | Aquificales                       | Hydrogenothermaceae           | Persephonella             | Persephonella sp.                                           |
| 1                   | Bacteria Bacteroidetes            | Flavobacteriia                    | Flavobacteriales                  | Flavobacteriaceae             | Flavobacterium            | Flavobacterium sp.                                          |
| 1                   | Bacteria Bacteroidetes            | Cytophagia                        | Cytophagales                      | Amoebophilaceae               | Candidatus Amoebophilus   | Candidatus Amoebophilus asiaticus                           |
| 1                   | Bacteria Bacteroidetes            |                                   |                                   |                               |                           |                                                             |
| 2                   | Bacteria Candidatus Dadabacteria  | Candidatus Dadabacteria           | Candidatus Dadabacteria bacterium | CSP1-2                        |                           |                                                             |
| 1                   | Bacteria Candidatus Tectomicrobia | Candidatus Entotheonella          | Candidatus Entotheonella sp.      | TSY2                          |                           |                                                             |
| 1                   | Bacteria Chloroflexi              | Chloroflexia                      | Chloroflexiales                   | Chloroflexineae               | Oscillochloridaceae       | Oscillochloris<br>Oscillochloris trichoides                 |
| 13                  | Bacteria Cyanobacteria            | Oscillatoriophycideae             | Chroococcales                     | Microcystaceae                | Microcystis               | Microcystis aeruginosa                                      |
| 1                   | Bacteria Cyanobacteria            | Oscillatoriophycideae             | Oscillatoriales                   | Oscillatoriaceae              | Limnoraphis               | Limnoraphis robusta                                         |
| 1                   | Bacteria Cyanobacteria            | Oscillatoriophycideae             | Chroococcales                     | Microcystaceae                | Microcystis               | Microcystis sp.                                             |
| 1                   | Bacteria Cyanobacteria            | Nostocales                        | Nostocaceae                       | Anabaena                      | Anabaena sp.              |                                                             |
| 1                   | Bacteria Cyanobacteria            | cyanobacterium                    |                                   |                               |                           |                                                             |
| 3                   | Bacteria Firmicutes               | Bacilli                           | Bacillales                        | Paenibacillaceae              | Aneurinibacillus          | Aneurinibacillus soli                                       |
| 1                   | Bacteria Firmicutes               | Negativicutes                     | Selenomonadales                   | Selenomonadaceae              | Selenomonas               | Selenomonas ruminantium                                     |
| 1                   | Bacteria Firmicutes               | Clostridia                        | Thermoanaerobacterales            | Thermoanaerobacterales        | Family III.Incertae Sedis | Caldicellulosiruptor<br>Caldicellulosiruptor kristjanssonii |
| 1                   | Bacteria Firmicutes               | Clostridia                        | Halanaerobiales                   | Halobacteroidaceae            | Halobacteroidaceae        | bacterium                                                   |
| 1                   | Bacteria Firmicutes               | Bacilli                           | Lactobacillales                   | Enterococcaceae               | Enterococcus              | Enterococcus hirae                                          |
| 1                   | Bacteria Firmicutes               | Bacilli                           | Bacillales                        | Bacillaceae                   | Bacillus                  | Bacillus humi                                               |
| 1                   | Bacteria Firmicutes               | Bacilli                           | Bacillales                        | Bacillaceae                   | Bacillus                  | Bacillus fastidiosus                                        |
| 1                   | Bacteria Firmicutes               | Bacilli                           | Bacillales                        |                               |                           |                                                             |
| 2                   | Bacteria Nitrospirae              | Nitrospirae                       | bacterium                         |                               |                           |                                                             |
| 1                   | Bacteria Nitrospirae              | Nitrospira                        | Nitrospirales                     | Nitrospiraceae                | Candidatus Magnetoovum    | Candidatus Magnetoovum chiemensis                           |
| 1                   | Bacteria Parcubacteria            | group bacterium GW2011_GWC1_45_13 |                                   |                               |                           |                                                             |
| 1                   | Bacteria Parcubacteria            | group bacterium GW2011_GWC1_38_22 |                                   |                               |                           |                                                             |
| 34                  | Bacteria Proteobacteria           | Gammaproteobacteria               |                                   |                               |                           |                                                             |
| 5                   | Bacteria Proteobacteria           |                                   |                                   |                               |                           |                                                             |
| 2                   | Bacteria Proteobacteria           | Gammaproteobacteria               | endosymbiont of Ridgeia piscesae  |                               |                           |                                                             |
| 1                   | Bacteria Proteobacteria           | Gammaproteobacteria               | Vibrionales                       | Vibrionaceae                  | Vibrio                    | Vibrio crassostreae                                         |
| 1                   | Bacteria Proteobacteria           | Gammaproteobacteria               | Oceanospirillales                 | Oleiphilaceae                 | Oleiphilus                | Oleiphilus sp.<br>HI0086                                    |
| 1                   | Bacteria Proteobacteria           | Gammaproteobacteria               | Oceanospirillales                 | Oceanospirillaceae            | Oleispira                 | Oleispira antarctica                                        |
| 1                   | Bacteria Proteobacteria           | Gammaproteobacteria               | Oceanospirillales                 | Oceanospirillaceae            | Marinobacterium           | Marinobacterium jannaschii                                  |
| 1                   | Bacteria Proteobacteria           | Gammaproteobacteria               | Cellvibrionales                   | Halieaceae                    | Haliea                    | Haliea salexigens                                           |
| 1                   | Bacteria Proteobacteria           | Gammaproteobacteria               | Cellvibrionales                   |                               |                           |                                                             |
| 1                   | Bacteria Proteobacteria           | Gammaproteobacteria               | Alteromonadales                   | Moritellaceae                 | Moritella                 | Moritella sp.                                               |
| 1                   | Bacteria Proteobacteria           | Gammaproteobacteria               | Alteromonadales                   | Alteromonadaceae              | Marinobacter              | Marinobacter lipolyticus                                    |
| 1                   | Bacteria Proteobacteria           | delta/epsilon subdivisions        | Epsilonproteobacteria             | Sulfurovum                    | Sulfurovum sp.            |                                                             |
| 1                   | Bacteria Proteobacteria           | delta/epsilon subdivisions        | Epsilonproteobacteria             | Campylobacterales             | Campylobacteraceae        | Sulfurospirillum<br>Sulfurospirillum sp.                    |
| 1                   | Bacteria Proteobacteria           | delta/epsilon subdivisions        | Deltaproteobacteria               | Desulfuromonadales            | Desulfuromonadaceae       | Pelobacter<br>Pelobacter carbinolicus                       |
| 1                   | Bacteria Proteobacteria           | delta/epsilon subdivisions        | Deltaproteobacteria               | Desulfovibrionales            | Desulfovibrionaceae       | Desulfovibrio<br>Desulfovibrio longus                       |
| 1                   | Bacteria Proteobacteria           | delta/epsilon subdivisions        |                                   |                               |                           |                                                             |
| 1                   | Bacteria Proteobacteria           | Betaproteobacteria                | Candidatus Accumulibacter         | Candidatus Accumulibacter sp. |                           |                                                             |
| 1                   | Bacteria Proteobacteria           | Alphaproteobacteria               | Sphingomonadales                  | Sphingomonadaceae             | Sphingobium               | Sphingobium sp.                                             |
| 1                   | Bacteria Proteobacteria           | Alphaproteobacteria               |                                   |                               |                           |                                                             |
| 1                   | Bacteria Spirochaetes             | Spirochaetia                      | Leptospiraceae                    | Leptospira                    | Leptospira                | Leptospira kmetyi                                           |
| 9                   | Bacteria                          |                                   |                                   |                               |                           |                                                             |
| 1                   | Viruses Circoviridae              | Circovirus                        | Bat                               | circovirus                    |                           |                                                             |
| 1                   | Viruses                           |                                   |                                   |                               |                           |                                                             |

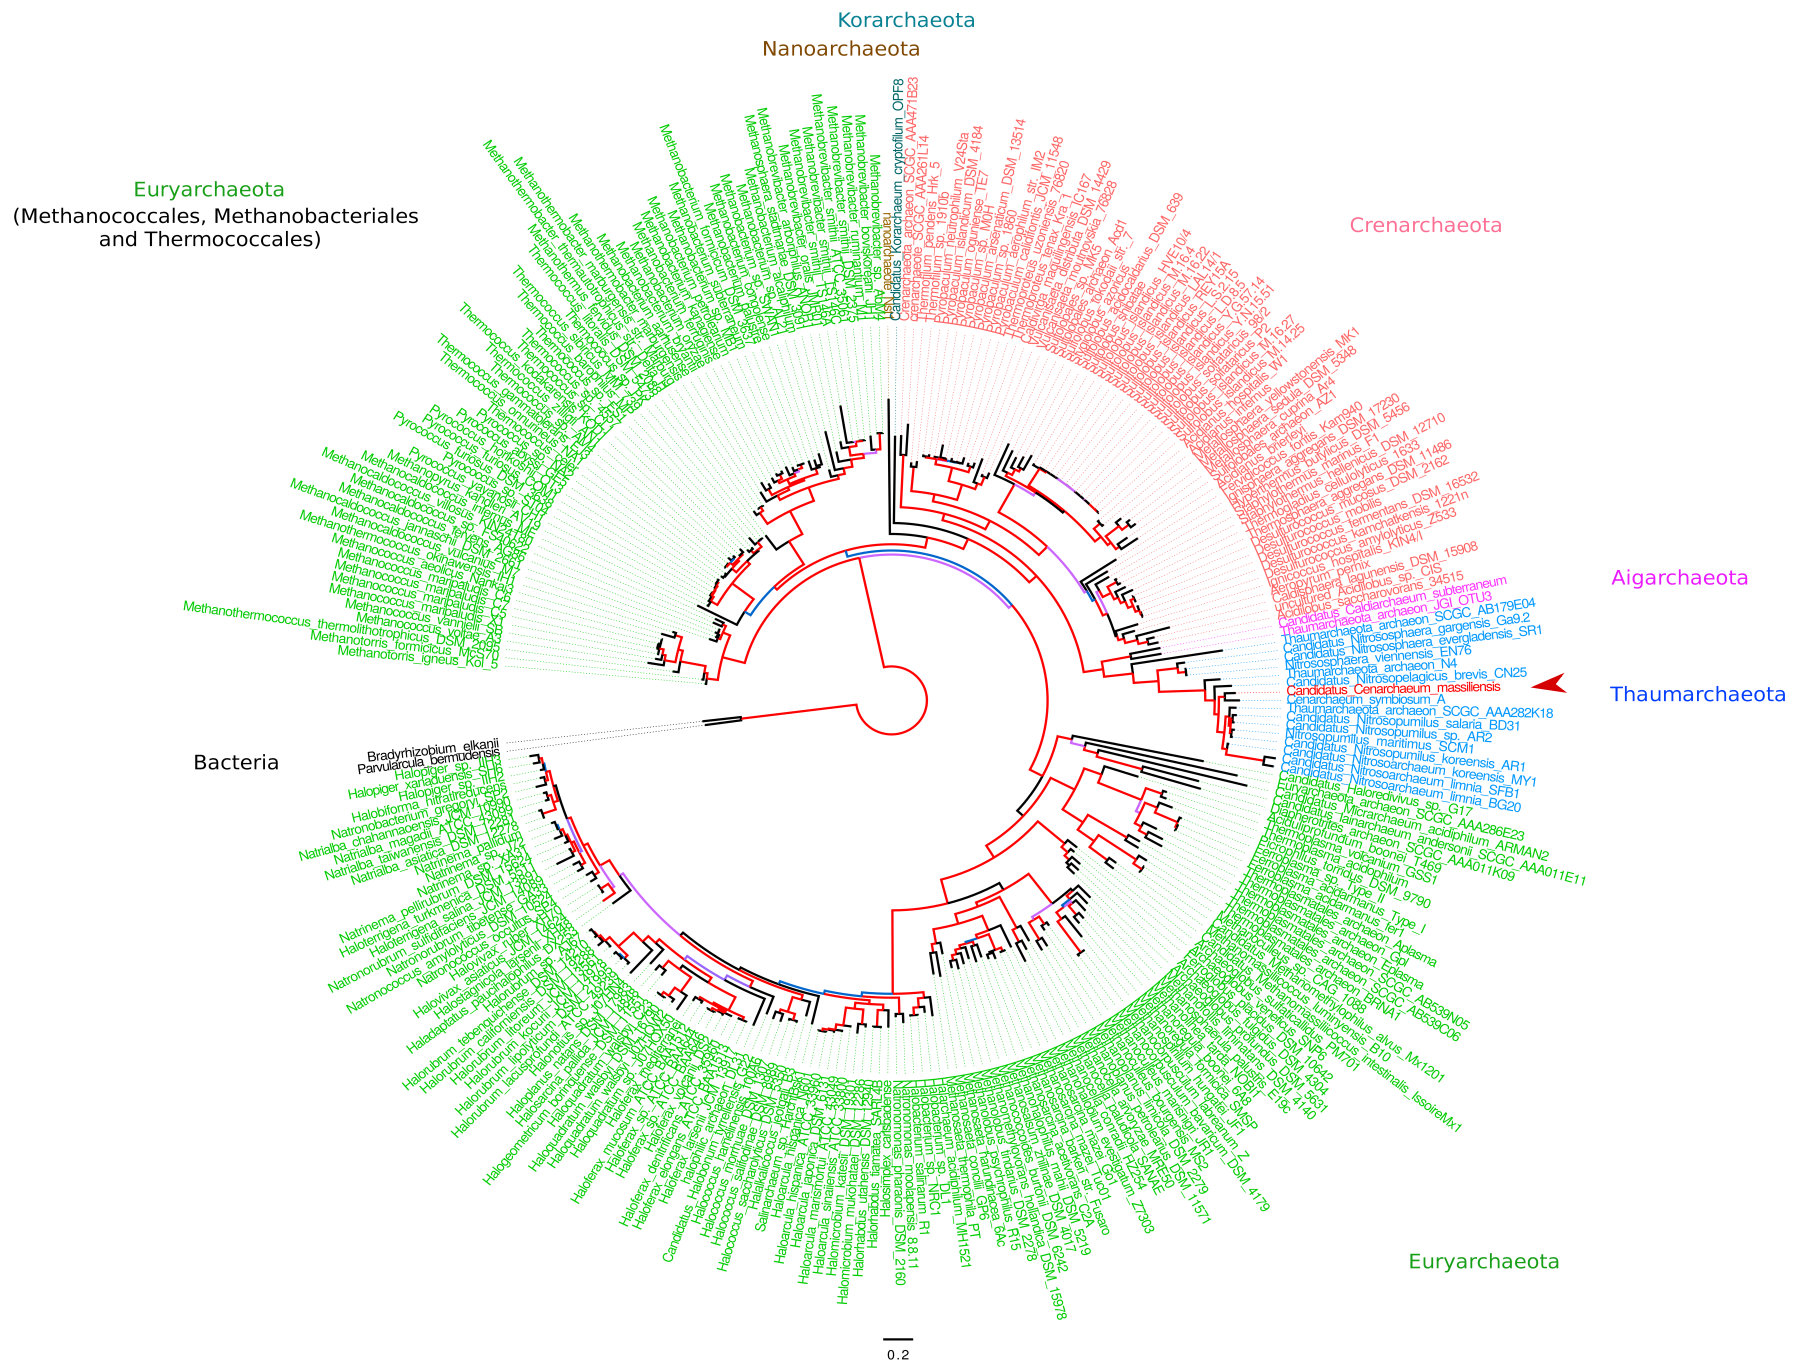

**Figure S1: Phylogenetic position of the main microbial species (in red) associated to *O. minuta*** (inferred by maximum-likelihood on ribosomal RNA genes, see material and method section for details). Main archaeal phyla are indicated and branch supports (approximate likelihood ratio test statistics with a Shimodaira-Hasegawa-like procedure) are indicated with a color code (>0.9, red; >0.7, purple; >0.5, blue and <0.5, black). Scale bar represents the number of substitutions per site.



**Table S3: Genome features of *Candidatus Cenarchaeum massiliensis* compared to other Thaumarchaea.**

All statistics were obtained from the current version of the genome and the tRNA were predicted using tRNA-scan-SE (Chan & Lowe 2019).

| Species                             | Size (Mb) | GC content | CDS content   | Coding genes | tRNA number | Source                                                                                                                                                                        |
|-------------------------------------|-----------|------------|---------------|--------------|-------------|-------------------------------------------------------------------------------------------------------------------------------------------------------------------------------|
| <i>Cenarchaeum massiliensis</i>     | 1.63      | 37.30%     | <b>83.90%</b> | 1675         | 48          |                                                                                                                                                                               |
| <i>Cenarchaeum symbiosum</i>        | 2.05      | 57.70%     | 91.40%        | 2017         | 45          | <a href="http://bacteria.ensembl.org/cenarchaeum_symbiosum_a/Info/Index">http://bacteria.ensembl.org/cenarchaeum_symbiosum_a/Info/Index</a>                                   |
| <i>Nitrosopumilus maritimus</i>     | 1.65      | 34.20%     | 90.30%        | 1795         | 44          | <a href="http://bacteria.ensembl.org/nitrosopumilus_maritimus_scm1/Info/Index">http://bacteria.ensembl.org/nitrosopumilus_maritimus_scm1/Info/Index</a>                       |
| <i>Nitrosopumilus koreensis</i>     | 1.64      | 34.20%     | 87.20%        | 1890         | 41          | <a href="http://bacteria.ensembl.org/candidatus_nitrosopumilus_koreensis_ar1/Info/Index">http://bacteria.ensembl.org/candidatus_nitrosopumilus_koreensis_ar1/Info/Index</a>   |
| <i>Nitrosoarchaeum koreensis</i>    | 1.61      | 32.70%     | 89%           | 1945         | 42          | <a href="http://bacteria.ensembl.org/candidatus_nitrosoarchaeum_koreensis_my1/Info/Index">http://bacteria.ensembl.org/candidatus_nitrosoarchaeum_koreensis_my1/Info/Index</a> |
| <i>Nitrosoarchaeum limnia</i>       | 1.77      | 32.50%     | 83.40%        | 2038         | 45          | <a href="http://bacteria.ensembl.org/candidatus_nitrosoarchaeum_limnia_sfb1/Info/Index">http://bacteria.ensembl.org/candidatus_nitrosoarchaeum_limnia_sfb1/Info/Index</a>     |
| <i>Nitrosopelagicus brevis</i>      | 1.23      | 33.20%     | 94.60%        | 1445         | 42          | <a href="https://www.ncbi.nlm.nih.gov/nuccore/CP007026.1">https://www.ncbi.nlm.nih.gov/nuccore/CP007026.1</a>                                                                 |
| <i>Nitrososphaera viennensis</i>    | 2.53      | 52.70%     | 87%           | 3123         | 39          | <a href="http://www.ncbi.nlm.nih.gov/genome/?term=Nitrososphaera+viennensis">http://www.ncbi.nlm.nih.gov/genome/?term=Nitrososphaera+viennensis</a>                           |
| <i>Nitrososphaera gargensis</i>     | 2.83      | 48.30%     | 81.60%        | 3565         | 34          | <a href="https://www.ncbi.nlm.nih.gov/genome/?term=Candidatus+Nitrososphaera%20gargensis">https://www.ncbi.nlm.nih.gov/genome/?term=Candidatus+Nitrososphaera%20gargensis</a> |
| <i>Nitrososphaera evergladensis</i> | 2.95      | 50.10%     | 83.40%        | 3499         | 39          | <a href="http://www.ncbi.nlm.nih.gov/nuccore/CP007174.1">http://www.ncbi.nlm.nih.gov/nuccore/CP007174.1</a>                                                                   |

Mb: megabase

CDS: coding sequence.





























|                                                |                                                                                |                     |                   |                                      |                                                           |
|------------------------------------------------|--------------------------------------------------------------------------------|---------------------|-------------------|--------------------------------------|-----------------------------------------------------------|
| Candidatus Cenarchaeum massiliensis K8823_1073 | 382 Redoxin domain-containing protein                                          | IPR008866;IPR012336 | OG5_208929        | Misc                                 | Cenarchaeum Nitrosoarchaeum Nitrosopumilus Nitrososphaera |
| Candidatus Cenarchaeum massiliensis K8823_1140 | 257 inositol-3-γ-phosphatase synthase                                          | K01609              | OG5_125960        | Amino acid metabolism                | Cenarchaeum Nitrosoarchaeum Nitrosopumilus Nitrososphaera |
| Candidatus Cenarchaeum massiliensis K8823_12   | 405 Cysteine sulfinate desulfurase/cysteine desulfurase                        | K04487              | OG5_126959        | Metabolism of cofactors and vitamins | Cenarchaeum Nitrosoarchaeum Nitrosopumilus Nitrososphaera |
| Candidatus Cenarchaeum massiliensis K8823_1460 | 335 pyridoxal-phosphate-dependent protein                                      | K01738              | OG5_126662        | Amino acid metabolism                | Cenarchaeum Nitrosoarchaeum Nitrosopumilus Nitrososphaera |
| Candidatus Cenarchaeum massiliensis K8823_1471 | 76 hypothetical protein                                                        |                     | nmay YP_001582526 | Unknown function                     | Cenarchaeum Nitrosoarchaeum Nitrosopumilus Nitrososphaera |
| Candidatus Cenarchaeum massiliensis K8823_1475 | 151 hypothetical protein                                                       |                     | OG5_126959        | Metabolism of cofactors and vitamins | Cenarchaeum Nitrosoarchaeum Nitrosopumilus Nitrososphaera |
| Candidatus Cenarchaeum massiliensis K8823_1598 | 382 aminotransferase class V                                                   | K04487              | OG5_138561        | Misc                                 | Cenarchaeum Nitrosoarchaeum Nitrosopumilus Nitrososphaera |
| Candidatus Cenarchaeum massiliensis K8823_164  | 565 hypothetical membrane protein                                              | K07333              | OG5_141276        | Misc                                 | Cenarchaeum Nitrosoarchaeum Nitrosopumilus Nitrososphaera |
| Candidatus Cenarchaeum massiliensis K8823_1658 | 272 6-pyruvoyl-tetrahydropterin synthase                                       |                     | OG5_126959        | Metabolism of cofactors and vitamins | Cenarchaeum Nitrosoarchaeum Nitrosopumilus Nitrososphaera |
| Candidatus Cenarchaeum massiliensis K8823_1663 | 384 cysteine desulfurase                                                       | K04487              | OG5_126959        | Metabolism of cofactors and vitamins | Cenarchaeum Nitrosoarchaeum Nitrosopumilus Nitrososphaera |
| Candidatus Cenarchaeum massiliensis K8823_1670 | 384 cysteine desulfurase                                                       | K04487              | OG5_126959        | Metabolism of cofactors and vitamins | Cenarchaeum Nitrosoarchaeum Nitrosopumilus Nitrososphaera |
| Candidatus Cenarchaeum massiliensis K8823_242  | 131 hypothetical protein                                                       | K09736              | OG5_145374        | Unknown function                     | Cenarchaeum Nitrosoarchaeum Nitrosopumilus Nitrososphaera |
| Candidatus Cenarchaeum massiliensis K8823_267  | 695 regulatory protein ArsR                                                    | K00527              | OG5_138803        | Nucleotide metabolism                | Cenarchaeum Nitrosoarchaeum Nitrosopumilus Nitrososphaera |
| Candidatus Cenarchaeum massiliensis K8823_349  | 79 hypothetical protein                                                        |                     | nmay YP_001582401 | Unknown function                     | Cenarchaeum Nitrosoarchaeum Nitrosopumilus Nitrososphaera |
| Candidatus Cenarchaeum massiliensis K8823_380  | 1019 DEAD/DEAH box helicase                                                    | K01153              | OG5_135105        | Misc                                 | Cenarchaeum Nitrosoarchaeum Nitrosopumilus Nitrososphaera |
| Candidatus Cenarchaeum massiliensis K8823_381  | 405 restriction endonuclease S subunit                                         |                     | OG5_132451        | DNA modification                     | Cenarchaeum Nitrosoarchaeum Nitrosopumilus Nitrososphaera |
| Candidatus Cenarchaeum massiliensis K8823_382  | 529 N-6 DNA methylase                                                          |                     | OG5_135747        | DNA modification                     | Cenarchaeum Nitrosoarchaeum Nitrosopumilus Nitrososphaera |
| Candidatus Cenarchaeum massiliensis K8823_540  | 840 helicase                                                                   | K03427              | OG5_130740        | DNA modification                     | Cenarchaeum Nitrosoarchaeum Nitrosopumilus Nitrososphaera |
| Candidatus Cenarchaeum massiliensis K8823_549  | 225 class I glutamine amidotransferase                                         | K06877              | OG5_136506        | Amino acid metabolism                | Cenarchaeum Nitrosoarchaeum Nitrosopumilus Nitrososphaera |
| Candidatus Cenarchaeum massiliensis K8823_559  | 418 hypothetical protein                                                       |                     | OG5_241572        | Unknown function                     | Cenarchaeum Nitrosoarchaeum Nitrosopumilus Nitrososphaera |
| Candidatus Cenarchaeum massiliensis K8823_576  | 330 hypothetical protein                                                       |                     | OG5_128763        | Carbohydrate metabolism              | Cenarchaeum Nitrosoarchaeum Nitrosopumilus Nitrososphaera |
| Candidatus Cenarchaeum massiliensis K8823_581  | 606 potassium transporter Trk                                                  |                     | OG5_133741        | Transport                            | Cenarchaeum Nitrosoarchaeum Nitrosopumilus Nitrososphaera |
| Candidatus Cenarchaeum massiliensis K8823_641  | 253 Nucleotidyl transferase                                                    | K00966              | OG5_131193        | Carbohydrate metabolism              | Cenarchaeum Nitrosoarchaeum Nitrosopumilus Nitrososphaera |
| Candidatus Cenarchaeum massiliensis K8823_666  | 371 carbamoyl-phosphate synthase small subunit                                 |                     | OG5_128943        | Nucleotide metabolism                | Cenarchaeum Nitrosoarchaeum Nitrosopumilus Nitrososphaera |
| Candidatus Cenarchaeum massiliensis K8823_61   | 327 Mgt and Co2 transporter                                                    | K01956              | OG5_156594        | Transport                            | Cenarchaeum Nitrosoarchaeum Nitrosopumilus Nitrososphaera |
| Candidatus Cenarchaeum massiliensis K8823_747  | 74 hypothetical protein                                                        | K03284              | nmay YP_001581547 | Unknown function                     | Cenarchaeum Nitrosoarchaeum Nitrosopumilus Nitrososphaera |
| Candidatus Cenarchaeum massiliensis K8823_773  | 389 aminotransferase class V                                                   |                     | OG5_126959        | Metabolism of cofactors and vitamins | Cenarchaeum Nitrosoarchaeum Nitrosopumilus Nitrososphaera |
| Candidatus Cenarchaeum massiliensis K8823_70   | 334 tRNA (S-methyl aminomethyl-2-thiouridyate)-methyltransferase               | K04487              | OG5_158947        | Translation                          | Cenarchaeum Nitrosoarchaeum Nitrosopumilus Nitrososphaera |
| Candidatus Cenarchaeum massiliensis K8823_828  | 246 uracopyrimin-III C-methyltransferase                                       | K00566              | OG5_128100        | Metabolism of cofactors and vitamins | Cenarchaeum Nitrosoarchaeum Nitrosopumilus Nitrososphaera |
| Candidatus Cenarchaeum massiliensis K8823_842  | 91 hypothetical protein                                                        | K02303              | OG5_149721        | Unknown function                     | Cenarchaeum Nitrosoarchaeum Nitrosopumilus Nitrososphaera |
| Candidatus Cenarchaeum massiliensis K8823_273  | 159 Integrase protein family                                                   |                     | OG5_126959        | Metabolism of cofactors and vitamins | Cenarchaeum Nitrosoarchaeum Nitrosopumilus Nitrososphaera |
| Candidatus Cenarchaeum massiliensis K8823_337  | 502 MBL fold metallo-hydrolase                                                 |                     | OG5_131049        | Misc                                 | Cenarchaeum Nitrosoarchaeum Nitrososphaera                |
| Candidatus Cenarchaeum massiliensis K8823_1333 | 3274 hypothetical protein                                                      | K12574              | OG5_131049        | Misc                                 | Cenarchaeum Nitrosoarchaeum Nitrososphaera                |
| Candidatus Cenarchaeum massiliensis K8823_1684 | 84 hypothetical protein                                                        |                     | OG5_126959        | Metabolism of cofactors and vitamins | Cenarchaeum Nitrosoarchaeum Nitrosopumilus Nitrososphaera |
| Candidatus Cenarchaeum massiliensis K8823_682  | 436 hypothetical protein                                                       |                     | OG5_126959        | Metabolism of cofactors and vitamins | Cenarchaeum Nitrosoarchaeum Nitrosopumilus Nitrososphaera |
| Candidatus Cenarchaeum massiliensis K8823_205  | 102 hypothetical protein                                                       |                     | OG5_146378        | Unknown function                     | Cenarchaeum Nitrosoarchaeum Nitrosopumilus Nitrososphaera |
| Candidatus Cenarchaeum massiliensis K8823_422  | 317 aerotolerance regulator Bata                                               |                     | OG5_143376        | Stress & defense                     | Cenarchaeum Nitrosoarchaeum Nitrosopumilus Nitrososphaera |
| Candidatus Cenarchaeum massiliensis K8823_423  | 295 hypothetical protein                                                       | K07114              | OG5_149721        | Unknown function                     | Cenarchaeum Nitrosoarchaeum Nitrosopumilus Nitrososphaera |
| Candidatus Cenarchaeum massiliensis K8823_424  | 330 ATPase                                                                     | K03924              | OG5_130615        | Misc                                 | Cenarchaeum Nitrosoarchaeum Nitrosopumilus Nitrososphaera |
| Candidatus Cenarchaeum massiliensis K8823_565  | 414 iron transporter                                                           |                     | OG5_177650        | Transport                            | Cenarchaeum Nitrosoarchaeum Nitrosopumilus Nitrososphaera |
| Candidatus Cenarchaeum massiliensis K8823_598  | 43 hypothetical protein                                                        |                     | nmay YP_001582507 | Unknown function                     | Cenarchaeum Nitrosoarchaeum Nitrosopumilus Nitrososphaera |
| Candidatus Cenarchaeum massiliensis K8823_1179 | 253 DNA (cytosine-5)-methyltransferase                                         | K00558              | OG5_129430        | Amino acid metabolism                | Cenarchaeum Nitrosoarchaeum Nitrosopumilus Nitrososphaera |
| Candidatus Cenarchaeum massiliensis K8823_1398 | 165 hypothetical membrane protein                                              |                     | OG5_234685        | Unknown function                     | Cenarchaeum Nitrosoarchaeum Nitrosopumilus Nitrososphaera |
| Candidatus Cenarchaeum massiliensis K8823_1619 | 462 DNA cytosine methyltransferase                                             | K00558              | OG5_129430        | Amino acid metabolism                | Cenarchaeum Nitrosoarchaeum Nitrosopumilus Nitrososphaera |
| Candidatus Cenarchaeum massiliensis K8823_322  | 48 Ribosomal protein L37E                                                      |                     | OG5_126918        | Translation                          | Cenarchaeum Nitrosoarchaeum Nitrosopumilus Nitrososphaera |
| Candidatus Cenarchaeum massiliensis K8823_518  | 324 DNA-cytosine methyltransferase                                             |                     | OG5_129430        | Amino acid metabolism                | Cenarchaeum Nitrosoarchaeum Nitrosopumilus Nitrososphaera |
| Candidatus Cenarchaeum massiliensis K8823_655  | 332 cytosine-specific methyltransferase                                        | K00558              | OG5_129430        | Amino acid metabolism                | Cenarchaeum Nitrosoarchaeum Nitrosopumilus Nitrososphaera |
| Candidatus Cenarchaeum massiliensis K8823_763  | 353 DNA (cytosine-5)-methyltransferase                                         | K00558              | OG5_129430        | Amino acid metabolism                | Cenarchaeum Nitrosoarchaeum Nitrosopumilus Nitrososphaera |
| Candidatus Cenarchaeum massiliensis K8823_1536 | 156 methyltransferase                                                          |                     | OG5_129618        | Transcription                        | Cenarchaeum Nitrosoarchaeum Nitrosopumilus Nitrososphaera |
| Candidatus Cenarchaeum massiliensis K8823_1573 | 124 hypothetical protein                                                       |                     | nmay YP_001582496 | Unknown function                     | Cenarchaeum Nitrosoarchaeum Nitrosopumilus Nitrososphaera |
| Candidatus Cenarchaeum massiliensis K8823_1603 | 320 hypothetical protein                                                       |                     | OG5_229125        | Unknown function                     | Cenarchaeum Nitrosoarchaeum Nitrosopumilus Nitrososphaera |
| Candidatus Cenarchaeum massiliensis K8823_1650 | 356 Phosphonate ABC transporter, periplasmic phosphonate-binding protein       | K02044              | OG5_143155        | Transport                            | Cenarchaeum Nitrosoarchaeum Nitrosopumilus Nitrososphaera |
| Candidatus Cenarchaeum massiliensis K8823_1651 | 250 phosphate ABC transporter ATPase                                           | K02071              | OG5_152077        | Nucleotide metabolism                | Cenarchaeum Nitrosoarchaeum Nitrosopumilus Nitrososphaera |
| Candidatus Cenarchaeum massiliensis K8823_1652 | 260 phosphonate ABC transporter inner membrane subunit (pH <sub>in</sub> )     | K02042              | OG5_136945        | Transport                            | Cenarchaeum Nitrosoarchaeum Nitrosopumilus Nitrososphaera |
| Candidatus Cenarchaeum massiliensis K8823_421  | 624 hypothetical protein                                                       |                     | OG5_136945        | Transport                            | Cenarchaeum Nitrosoarchaeum Nitrosopumilus Nitrososphaera |
| Candidatus Cenarchaeum massiliensis K8823_521  | 77 zinc finger CDGSH-type domain protein                                       |                     | OG5_131688        | Unknown function                     | Cenarchaeum Nitrosoarchaeum Nitrosopumilus Nitrososphaera |
| Candidatus Cenarchaeum massiliensis K8823_602  | 416 ABC-type branched-chain amino acid transport system, periplasmic component | K01999              | OG5_130525        | Transport                            | Cenarchaeum Nitrosoarchaeum Nitrosopumilus Nitrososphaera |
| Candidatus Cenarchaeum massiliensis K8823_604  | 550 ABC-type branched-chain amino acid transport system, periplasmic component | K01999              | OG5_130525        | Transport                            | Cenarchaeum Nitrosoarchaeum Nitrosopumilus Nitrososphaera |
| Candidatus Cenarchaeum massiliensis K8823_605  | 243 ABC-type branched-chain amino acid transport system, periplasmic component | K01999              | OG5_130525        | Transport                            | Cenarchaeum Nitrosoarchaeum Nitrosopumilus Nitrososphaera |
| Candidatus Cenarchaeum massiliensis K8823_627  | 90 zinc finger UBP-type protein                                                |                     | OG5_132669        | Unknown function                     | Cenarchaeum Nitrosoarchaeum Nitrosopumilus Nitrososphaera |
| Candidatus Cenarchaeum massiliensis K8823_783  | 320 hypothetical protein                                                       |                     | OG5_229125        | Unknown function                     | Cenarchaeum Nitrosoarchaeum Nitrosopumilus Nitrososphaera |
| Candidatus Cenarchaeum massiliensis K8823_904  | 231 Cobyrinic acid a-c-diamide synthase                                        | K03496              | OG5_130386        | Metabolism of cofactors and vitamins | Cenarchaeum Nitrosoarchaeum Nitrosopumilus Nitrososphaera |
| Candidatus Cenarchaeum massiliensis K8823_1322 | 271 parB-like partition protein                                                |                     | OG5_132436        | Transcription                        | Cenarchaeum Nitrosoarchaeum Nitrosopumilus Nitrososphaera |
| Candidatus Cenarchaeum massiliensis K8823_1566 | 275 Gp37Gp68 family protein                                                    |                     | OG5_165182        | Misc                                 | Cenarchaeum Nitrosoarchaeum Nitrosopumilus Nitrososphaera |
| Candidatus Cenarchaeum massiliensis K8823_398  | 346 CRISPR-associated protein Cas 1                                            |                     | OG5_136066        | Stress & defense                     | Cenarchaeum Nitrosoarchaeum Nitrosopumilus Nitrososphaera |
| Candidatus Cenarchaeum massiliensis K8823_389  | 85 hypothetical protein                                                        |                     | OG5_130386        | Unknown function                     | Cenarchaeum Nitrosoarchaeum Nitrosopumilus Nitrososphaera |
| Candidatus Cenarchaeum massiliensis K8823_890  | 244 Transposase                                                                |                     | OG5_136743        | DNA modification                     | Cenarchaeum Nitrosoarchaeum Nitrosopumilus Nitrososphaera |
| Candidatus Cenarchaeum massiliensis K8823_902  | 99 Winged helix-turn-helix containing protein                                  |                     | OG5_127031        | Unknown function                     | Cenarchaeum Nitrosoarchaeum Nitrosopumilus Nitrososphaera |
| Candidatus Cenarchaeum massiliensis K8823_903  | 244 Transposase                                                                |                     | OG5_136743        | DNA modification                     | Cenarchaeum Nitrosoarchaeum Nitrosopumilus Nitrososphaera |
| Candidatus Cenarchaeum massiliensis K8823_904  | 79 Transposase                                                                 |                     | OG5_136743        | DNA modification                     | Cenarchaeum Nitrosoarchaeum Nitrosopumilus Nitrososphaera |
| Candidatus Cenarchaeum massiliensis K8823_933  | 334 transposase                                                                |                     | OG5_127031        | Unknown function                     | Cenarchaeum Nitrosoarchaeum Nitrosopumilus Nitrososphaera |
| Candidatus Cenarchaeum massiliensis K8823_937  | 100 Transposase                                                                |                     | OG5_127031        | Unknown function                     | Cenarchaeum Nitrosoarchaeum Nitrosopumilus Nitrososphaera |
| Candidatus Cenarchaeum massiliensis K8823_939  | 82 Transposase                                                                 |                     | OG5_127031        | Unknown function                     | Cenarchaeum Nitrosoarchaeum Nitrosopumilus Nitrososphaera |
| Candidatus Cenarchaeum massiliensis K8823_940  | 203 Transposase                                                                |                     | OG5_127031        | Unknown function                     | Cenarchaeum Nitrosoarchaeum Nitrosopumilus Nitrososphaera |
| Candidatus Cenarchaeum massiliensis K8823_940  | 101 Transposase                                                                |                     | OG5_127031        | Unknown function                     | Cenarchaeum Nitrosoarchaeum Nitrosopumilus Nitrososphaera |
| Candidatus Cenarchaeum massiliensis K8823_8    | 116 Transposase                                                                |                     | OG5_127031        | Unknown function                     | Cenarchaeum Nitrosoarchaeum Nitrosopumilus Nitrososphaera |
| Candidatus Cenarchaeum massiliensis K8823_88   | 58 hypothetical protein                                                        |                     | OG5_127031        | Unknown function                     | Cenarchaeum Nitrosoarchaeum Nitrosopumilus Nitrososphaera |
| Candidatus Cenarchaeum massiliensis K8823_969  | 92 hypothetical protein                                                        |                     | OG5_185721        | DNA modification                     | Cenarchaeum Nitrosoarchaeum Nitrosopumilus Nitrososphaera |
| Candidatus Cenarchaeum massiliensis K8823_993  | 314 Transposase                                                                |                     | OG5_136743        | DNA modification                     | Cenarchaeum Nitrosoarchaeum Nitrosopumilus Nitrososphaera |
| Candidatus Cenarchaeum massiliensis K8823_1004 | 347 RelA/SpoT protein                                                          |                     | OG5_149795        | Signaling                            | Cenarchaeum Nitrosoarchaeum Nitrosopumilus Nitrososphaera |
| Candidatus Cenarchaeum massiliensis K8823_1034 | 72 hypothetical membrane protein                                               |                     | OG5_127031        | Unknown function                     | Cenarchaeum Nitrosoarchaeum Nitrosopumilus Nitrososphaera |
| Candidatus Cenarchaeum massiliensis K8823_1036 | 148 Transposase                                                                |                     | OG5_127031        | Unknown function                     | Cenarchaeum Nitrosoarchaeum Nitrosopumilus Nitrososphaera |
| Candidatus Cenarchaeum massiliensis K8823_1079 | 233 Transposase                                                                |                     | OG5_136743        | DNA modification                     | Cenarchaeum Nitrosoarchaeum Nitrosopumilus Nitrososphaera |
| Candidatus Cenarchaeum massiliensis K8823_1080 | 79 Transposase                                                                 |                     | OG5_136743        | DNA modification                     | Cenarchaeum Nitrosoarchaeum Nitrosopumilus Nitrososphaera |
| Candidatus Cenarchaeum massiliensis K8823_1088 | 1137 restriction endonuclease                                                  |                     | OG5_145232        | DNA modification                     | Cenarchaeum Nitrosoarchaeum Nitrosopumilus Nitrososphaera |
| Candidatus Cenarchaeum massiliensis K8823_1098 | 1088 DEAD-like helicase-domain-containing protein                              | K07317              | OG5_133337        | DNA modification                     | Cenarchaeum Nitrosoarchaeum Nitrosopumilus Nitrososphaera |
| Candidatus Cenarchaeum massiliensis K8823_1174 | 371 hypothetical protein                                                       |                     | OG5_185721        | DNA modification                     | Cenarchaeum Nitrosoarchaeum Nitrosopumilus Nitrososphaera |
| Candidatus Cenarchaeum massiliensis K8823_1187 | 44 hypothetical protein                                                        |                     | OG5_185721        | DNA modification                     | Cenarchaeum Nitrosoarchaeum Nitrosopumilus Nitrososphaera |
| Candidatus Cenarchaeum massiliensis K8823_1188 | 119 hypothetical protein                                                       |                     | OG5_185721        | DNA modification                     | Cenarchaeum Nitrosoarchaeum Nitrosopumilus Nitrososphaera |
| Candidatus Cenarchaeum massiliensis K8823_1194 | 187 Transposase                                                                |                     | OG5_127031        | Unknown function                     | Cenarchaeum Nitrosoarchaeum Nitrosopumilus Nitrososphaera |
| Candidatus Cenarchaeum massiliensis K8823_1194 | 145 Transposase                                                                |                     | OG5_127031        | Unknown function                     | Cenarchaeum Nitrosoarchaeum Nitrosopumilus Nitrososphaera |
| Candidatus Cenarchaeum massiliensis K8823_1235 | 323 Transposase                                                                |                     | OG5_136743        | DNA modification                     | Cenarchaeum Nitrosoarchaeum Nitrosopumilus Nitrososphaera |
| Candidatus Cenarchaeum massiliensis K8823_1255 | 506 abortive infection protein                                                 |                     | OG5_136743        | DNA modification                     | Cenarchaeum Nitrosoarchaeum Nitrosopumilus Nitrososphaera |
| Candidatus Cenarchaeum massiliensis K8823_119  | 196 DNA-3-methyladenine glycosylase II                                         | K01247              | OG5_136684        | DNA modification                     | Cenarchaeum Nitrosoarchaeum Nitrosopumilus Nitrososphaera |
| Candidatus Cenarchaeum massiliensis K8823_1275 | 92 Transposase                                                                 |                     | OG5_127031        | Unknown function                     | Cenarchaeum Nitrosoarchaeum Nitrosopumilus Nitrososphaera |
| Candidatus Cenarchaeum massiliensis K8823_1276 | 179 Transposase                                                                |                     | OG5_127031        | Unknown function                     | Cenarchaeum Nitrosoarchaeum Nitrosopumilus Nitrososphaera |
| Candidatus Cenarchaeum massiliensis K8823_1306 | 144 death-on-curing family protein                                             |                     | OG5_144670        | Signaling                            | Cenarchaeum Nitrosoarchaeum Nitrosopumilus Nitrososphaera |
| Candidatus Cenarchaeum massiliensis K8823_1362 | 274 Transposase                                                                |                     | OG5_136743        | DNA modification                     | Cenarchaeum Nitrosoarchaeum Nitrosopumilus Nitrososphaera |

|                                                |                                                    |                                                           |            |                       |                             |
|------------------------------------------------|----------------------------------------------------|-----------------------------------------------------------|------------|-----------------------|-----------------------------|
| Candidatus Cenarchaeum massiliensis K8823_1383 | 79 Transposase                                     | IPR002559                                                 | OG5_136743 | DNA modification      | Cenarchaeum Nitrosoarchaeum |
| Candidatus Cenarchaeum massiliensis K8823_1392 | 109 hypothetical protein                           |                                                           | OG5_127031 | Unknown function      | Cenarchaeum Nitrosoarchaeum |
| Candidatus Cenarchaeum massiliensis K8823_1393 | 212 Transposase                                    |                                                           | OG5_127031 | Unknown function      | Cenarchaeum Nitrosoarchaeum |
| Candidatus Cenarchaeum massiliensis K8823_1411 | 96 hypothetical protein                            |                                                           | STG_0103   | Unknown function      | Cenarchaeum Nitrosoarchaeum |
| Candidatus Cenarchaeum massiliensis K8823_1507 | 118 Transposase                                    | IPR002559                                                 | OG5_136743 | DNA modification      | Cenarchaeum Nitrosoarchaeum |
| Candidatus Cenarchaeum massiliensis K8823_1571 | 323 Transposase                                    | IPR002559                                                 | OG5_136743 | DNA modification      | Cenarchaeum Nitrosoarchaeum |
| Candidatus Cenarchaeum massiliensis K8823_1574 | 304 Transposase                                    | IPR002559                                                 | OG5_136743 | DNA modification      | Cenarchaeum Nitrosoarchaeum |
| Candidatus Cenarchaeum massiliensis K8823_1575 | 106 Transposase                                    |                                                           | OG5_136743 | Unknown function      | Cenarchaeum Nitrosoarchaeum |
| Candidatus Cenarchaeum massiliensis K8823_1577 | 304 Transposase                                    | IPR002559                                                 | OG5_136743 | DNA modification      | Cenarchaeum Nitrosoarchaeum |
| Candidatus Cenarchaeum massiliensis K8823_1579 | 332 Transposase                                    |                                                           | OG5_127031 | Unknown function      | Cenarchaeum Nitrosoarchaeum |
| Candidatus Cenarchaeum massiliensis K8823_1600 | 77 Transposase                                     | IPR002559                                                 | STG_0032   | Unknown function      | Cenarchaeum Nitrosoarchaeum |
| Candidatus Cenarchaeum massiliensis K8823_1608 | 183 Transposase                                    | IPR002559                                                 | STG_0032   | Unknown function      | Cenarchaeum Nitrosoarchaeum |
| Candidatus Cenarchaeum massiliensis K8823_1609 | 179 Transposase                                    |                                                           | OG5_127031 | Unknown function      | Cenarchaeum Nitrosoarchaeum |
| Candidatus Cenarchaeum massiliensis K8823_1610 | 134 Homeodomain-like domain-containing protein     |                                                           | OG5_127031 | Unknown function      | Cenarchaeum Nitrosoarchaeum |
| Candidatus Cenarchaeum massiliensis K8823_1611 | 112 Transposase                                    | IPR003346                                                 | OG5_127931 | DNA modification      | Cenarchaeum Nitrosoarchaeum |
| Candidatus Cenarchaeum massiliensis K8823_1615 | 248 Transposase                                    |                                                           | OG5_136743 | DNA modification      | Cenarchaeum Nitrosoarchaeum |
| Candidatus Cenarchaeum massiliensis K8823_1616 | 79 Transposase                                     | IPR002559                                                 | OG5_136743 | DNA modification      | Cenarchaeum Nitrosoarchaeum |
| Candidatus Cenarchaeum massiliensis K8823_1628 | 125 Homeodomain-like domain-containing protein     |                                                           | OG5_127031 | Unknown function      | Cenarchaeum Nitrosoarchaeum |
| Candidatus Cenarchaeum massiliensis K8823_1629 | 179 Transposase                                    |                                                           | OG5_127031 | Unknown function      | Cenarchaeum Nitrosoarchaeum |
| Candidatus Cenarchaeum massiliensis K8823_1633 | 150 hypothetical protein                           | IPR007527                                                 | STG_0289   | Unknown function      | Cenarchaeum Nitrosoarchaeum |
| Candidatus Cenarchaeum massiliensis K8823_163  | 430 hypothetical membrane protein                  |                                                           | STG_0143   | Unknown function      | Cenarchaeum Nitrosoarchaeum |
| Candidatus Cenarchaeum massiliensis K8823_1661 | 79 Transposase                                     | IPR002559                                                 | OG5_136743 | DNA modification      | Cenarchaeum Nitrosoarchaeum |
| Candidatus Cenarchaeum massiliensis K8823_175  | 604 AAA-like domain-containing protein             |                                                           | OG5_179911 | Unknown function      | Cenarchaeum Nitrosoarchaeum |
| Candidatus Cenarchaeum massiliensis K8823_176  | 480 Type II/IV secretion system protein            | K07332                                                    | OG5_175628 | Transport             | Cenarchaeum Nitrosoarchaeum |
| Candidatus Cenarchaeum massiliensis K8823_18   | 369 Transposase                                    |                                                           | OG5_127931 | DNA modification      | Cenarchaeum Nitrosoarchaeum |
| Candidatus Cenarchaeum massiliensis K8823_229  | 135 hypothetical protein                           |                                                           | STG_0203   | Unknown function      | Cenarchaeum Nitrosoarchaeum |
| Candidatus Cenarchaeum massiliensis K8823_234  | 75 hypothetical protein                            |                                                           | STG_0101   | Unknown function      | Cenarchaeum Nitrosoarchaeum |
| Candidatus Cenarchaeum massiliensis K8823_1    | 431 hypothetical protein                           |                                                           | OG5_185721 | DNA modification      | Cenarchaeum Nitrosoarchaeum |
| Candidatus Cenarchaeum massiliensis K8823_25   | 230 SMF family protein                             | K04096                                                    | OG5_133325 | DNA modification      | Cenarchaeum Nitrosoarchaeum |
| Candidatus Cenarchaeum massiliensis K8823_274  | 185 Transposase                                    | IPR007529                                                 | STG_0289   | Unknown function      | Cenarchaeum Nitrosoarchaeum |
| Candidatus Cenarchaeum massiliensis K8823_27   | 193 Transposase                                    | IPR003346                                                 | OG5_127931 | DNA modification      | Cenarchaeum Nitrosoarchaeum |
| Candidatus Cenarchaeum massiliensis K8823_31   | 115 hypothetical protein                           |                                                           | STG_0047   | Unknown function      | Cenarchaeum Nitrosoarchaeum |
| Candidatus Cenarchaeum massiliensis K8823_360  | 311 Transposase                                    | IPR002559                                                 | OG5_136743 | DNA modification      | Cenarchaeum Nitrosoarchaeum |
| Candidatus Cenarchaeum massiliensis K8823_368  | 427 DNA methylase domain-containing protein        | IPR002941                                                 | OG5_181907 | Unknown function      | Cenarchaeum Nitrosoarchaeum |
| Candidatus Cenarchaeum massiliensis K8823_370  | 369 Transposase                                    | IPR003346;IPR002525                                       | OG5_127931 | DNA modification      | Cenarchaeum Nitrosoarchaeum |
| Candidatus Cenarchaeum massiliensis K8823_374  | 179 Transposase                                    |                                                           | OG5_127031 | Unknown function      | Cenarchaeum Nitrosoarchaeum |
| Candidatus Cenarchaeum massiliensis K8823_384  | 240 hypothetical protein                           |                                                           | OG5_185721 | DNA modification      | Cenarchaeum Nitrosoarchaeum |
| Candidatus Cenarchaeum massiliensis K8823_394  | 761 CRISPR-associated helicase Cas3 family protein | K07012                                                    | OG5_136526 | Stress & defense      | Cenarchaeum Nitrosoarchaeum |
| Candidatus Cenarchaeum massiliensis K8823_396  | 297 type I-C CRISPR-associated protein Cas7/Csd2   |                                                           | OG5_228703 | Stress & defense      | Cenarchaeum Nitrosoarchaeum |
| Candidatus Cenarchaeum massiliensis K8823_397  | 211 CRISPR-associated protein Cas4                 | K07464                                                    | OG5_139298 | Stress & defense      | Cenarchaeum Nitrosoarchaeum |
| Candidatus Cenarchaeum massiliensis K8823_399  | 107 CRISPR-associated endonuclease Cas2            |                                                           | OG5_189005 | Stress & defense      | Cenarchaeum Nitrosoarchaeum |
| Candidatus Cenarchaeum massiliensis K8823_414  | 72 hypothetical protein                            |                                                           | OG5_185721 | DNA modification      | Cenarchaeum Nitrosoarchaeum |
| Candidatus Cenarchaeum massiliensis K8823_416  | 73 hypothetical protein                            |                                                           | OG5_185721 | DNA modification      | Cenarchaeum Nitrosoarchaeum |
| Candidatus Cenarchaeum massiliensis K8823_418  | 427 DNA methylase                                  | IPR002941                                                 | OG5_181907 | Unknown function      | Cenarchaeum Nitrosoarchaeum |
| Candidatus Cenarchaeum massiliensis K8823_420  | 286 Transposase                                    | IPR025959                                                 | OG5_127031 | Unknown function      | Cenarchaeum Nitrosoarchaeum |
| Candidatus Cenarchaeum massiliensis K8823_447  | 98 Transposase                                     |                                                           | STG_0101   | Unknown function      | Cenarchaeum Nitrosoarchaeum |
| Candidatus Cenarchaeum massiliensis K8823_472  | 1353 N6-adenine-specific DNA methyltransferase     | IPR002052                                                 | OG5_145232 | DNA modification      | Cenarchaeum Nitrosoarchaeum |
| Candidatus Cenarchaeum massiliensis K8823_473  | 198 helicase                                       | IPR025202                                                 | OG5_163337 | DNA modification      | Cenarchaeum Nitrosoarchaeum |
| Candidatus Cenarchaeum massiliensis K8823_474  | 893 helicase                                       | IPR016530;IPR014001;IPR003330;IPR01650;IPR014001;IPR01650 | OG5_163337 | DNA modification      | Cenarchaeum Nitrosoarchaeum |
| Candidatus Cenarchaeum massiliensis K8823_40   | 148 hypothetical protein                           |                                                           | OG5_141713 | Amino acid metabolism | Cenarchaeum Nitrosoarchaeum |
| Candidatus Cenarchaeum massiliensis K8823_41   | 230 SMF family protein                             | K04096                                                    | OG5_133325 | DNA modification      | Cenarchaeum Nitrosoarchaeum |
| Candidatus Cenarchaeum massiliensis K8823_3    | 320 Transposase                                    |                                                           | OG5_127031 | Unknown function      | Cenarchaeum Nitrosoarchaeum |
| Candidatus Cenarchaeum massiliensis K8823_651  | 315 Transposase                                    | IPR002559                                                 | OG5_136743 | DNA modification      | Cenarchaeum Nitrosoarchaeum |
| Candidatus Cenarchaeum massiliensis K8823_657  | 331 Transposase                                    | IPR002559                                                 | OG5_136743 | DNA modification      | Cenarchaeum Nitrosoarchaeum |
| Candidatus Cenarchaeum massiliensis K8823_660  | 331 Transposase DDE domain protein                 | IPR002559                                                 | OG5_136743 | DNA modification      | Cenarchaeum Nitrosoarchaeum |
| Candidatus Cenarchaeum massiliensis K8823_662  | 76 Transposase DDE domain protein                  |                                                           | OG5_136743 | DNA modification      | Cenarchaeum Nitrosoarchaeum |
| Candidatus Cenarchaeum massiliensis K8823_663  | 179 Transposase                                    |                                                           | OG5_127031 | Unknown function      | Cenarchaeum Nitrosoarchaeum |
| Candidatus Cenarchaeum massiliensis K8823_693  | 94 hypothetical protein                            |                                                           | STG_0071   | Unknown function      | Cenarchaeum Nitrosoarchaeum |
| Candidatus Cenarchaeum massiliensis K8823_697  | 148 Transposase                                    |                                                           | STG_0047   | Unknown function      | Cenarchaeum Nitrosoarchaeum |
| Candidatus Cenarchaeum massiliensis K8823_719  | 38 Transposase                                     | IPR004291                                                 | STG_0047   | Unknown function      | Cenarchaeum Nitrosoarchaeum |
| Candidatus Cenarchaeum massiliensis K8823_725  | 103 hypothetical protein                           |                                                           | OG5_185721 | DNA modification      | Cenarchaeum Nitrosoarchaeum |
| Candidatus Cenarchaeum massiliensis K8823_726  | 180 hypothetical protein                           |                                                           | OG5_185721 | DNA modification      | Cenarchaeum Nitrosoarchaeum |
| Candidatus Cenarchaeum massiliensis K8823_69   | 136 Transposase-like protein                       |                                                           | OG5_127031 | Unknown function      | Cenarchaeum Nitrosoarchaeum |
| Candidatus Cenarchaeum massiliensis K8823_790  | 207 Transposase                                    |                                                           | OG5_127031 | Unknown function      | Cenarchaeum Nitrosoarchaeum |
| Candidatus Cenarchaeum massiliensis K8823_794  | 1029 ATPase                                        | IPR003593                                                 | OG5_234716 | Unknown function      | Cenarchaeum Nitrosoarchaeum |
| Candidatus Cenarchaeum massiliensis K8823_372  | 286 Transposase                                    | IPR025959                                                 | OG5_127031 | Unknown function      | Cenarchaeum Nitrosoarchaeum |
| Candidatus Cenarchaeum massiliensis K8823_77   | 162 hypothetical protein                           | IPR025272                                                 |            | Unknown function      | Species specific            |
| Candidatus Cenarchaeum massiliensis K8823_888  | 163 hypothetical protein                           | IPR025272                                                 |            | Unknown function      | Species specific            |
| Candidatus Cenarchaeum massiliensis K8823_910  | 334 hypothetical protein                           |                                                           |            | Unknown function      | Species specific            |
| Candidatus Cenarchaeum massiliensis K8823_934  | 68 hypothetical protein                            |                                                           |            | Unknown function      | Species specific            |
| Candidatus Cenarchaeum massiliensis K8823_942  | 251 hypothetical protein                           | IPR007421                                                 |            | Unknown function      | Species specific            |
| Candidatus Cenarchaeum massiliensis K8823_944  | 123 DNA sulfur modification protein DndE           | IPR014969                                                 |            | DNA modification      | Species specific            |
| Candidatus Cenarchaeum massiliensis K8823_945  | 664 DNA sulfur modification protein DndD           | IPR017599                                                 |            | Transport             | Species specific            |
| Candidatus Cenarchaeum massiliensis K8823_950  | 123 Transposase                                    | IPR004291                                                 |            | Unknown function      | Species specific            |
| Candidatus Cenarchaeum massiliensis K8823_954  | 158 hypothetical protein                           |                                                           |            | Unknown function      | Species specific            |
| Candidatus Cenarchaeum massiliensis K8823_955  | 79 hypothetical protein                            |                                                           |            | Unknown function      | Species specific            |
| Candidatus Cenarchaeum massiliensis K8823_956  | 84 hypothetical protein                            |                                                           |            | Unknown function      | Species specific            |
| Candidatus Cenarchaeum massiliensis K8823_958  | 100 Transposase                                    | IPR025959                                                 |            | Unknown function      | Species specific            |
| Candidatus Cenarchaeum massiliensis K8823_959  | 151 Transposase                                    |                                                           |            | Unknown function      | Species specific            |
| Candidatus Cenarchaeum massiliensis K8823_966  | 148 hypothetical protein                           |                                                           |            | Unknown function      | Species specific            |
| Candidatus Cenarchaeum massiliensis K8823_968  | 130 hypothetical protein                           |                                                           |            | Unknown function      | Species specific            |
| Candidatus Cenarchaeum massiliensis K8823_970  | 113 hypothetical protein                           |                                                           |            | Unknown function      | Species specific            |
| Candidatus Cenarchaeum massiliensis K8823_971  | 65 hypothetical protein                            |                                                           |            | Unknown function      | Species specific            |
| Candidatus Cenarchaeum massiliensis K8823_972  | 84 hypothetical protein                            |                                                           |            | Unknown function      | Species specific            |
| Candidatus Cenarchaeum massiliensis K8823_984  | 284 HNH endonuclease                               | IPR003615                                                 |            | Misc                  | Species specific            |
| Candidatus Cenarchaeum massiliensis K8823_987  | 510 hypothetical protein                           |                                                           |            | Unknown function      | Species specific            |
| Candidatus Cenarchaeum massiliensis K8823_988  | 198 hypothetical protein                           |                                                           |            | Unknown function      | Species specific            |
| Candidatus Cenarchaeum massiliensis K8823_991  | 117 hypothetical protein                           | IPR002525                                                 |            | Unknown function      | Species specific            |
| Candidatus Cenarchaeum massiliensis K8823_995  | 94 Transposase                                     |                                                           |            | Unknown function      | Species specific            |
| Candidatus Cenarchaeum massiliensis K8823_997  | 62 hypothetical protein                            |                                                           |            | Unknown function      | Species specific            |
| Candidatus Cenarchaeum massiliensis K8823_999  | 123 hypothetical protein                           |                                                           |            | Unknown function      | Species specific            |
| Candidatus Cenarchaeum massiliensis K8823_1000 | 80 Transposase                                     | IPR004291                                                 |            | Unknown function      | Species specific            |
| Candidatus Cenarchaeum massiliensis K8823_1005 | 390 hypothetical protein                           | IPR014942                                                 |            | Unknown function      | Species specific            |
| Candidatus Cenarchaeum massiliensis K8823_1006 | 627 hypothetical protein                           |                                                           |            | Unknown function      | Species specific            |
| Candidatus Cenarchaeum massiliensis K8823_1018 | 60 hypothetical protein                            |                                                           |            | Unknown function      | Species specific            |
| Candidatus Cenarchaeum massiliensis K8823_1020 | 81 Transposase                                     | IPR002525                                                 |            | Unknown function      | Species specific            |
| Candidatus Cenarchaeum massiliensis K8823_1022 | 126 hypothetical membrane protein                  |                                                           |            | Unknown function      | Species specific            |
| Candidatus Cenarchaeum massiliensis K8823_1024 | 95 hypothetical protein                            | IPR004291                                                 |            | Unknown function      | Species specific            |





|                                                |                                                      |                     |                     |                       |                  |
|------------------------------------------------|------------------------------------------------------|---------------------|---------------------|-----------------------|------------------|
| Candidatus Cenarchaeum massiliensis K8823_1564 | 258 hypothetical protein                             |                     |                     | Unknown function      | Species specific |
| Candidatus Cenarchaeum massiliensis K8823_1565 | 318 hypothetical protein                             |                     |                     | Unknown function      | Species specific |
| Candidatus Cenarchaeum massiliensis K8823_1569 | 65 hypothetical protein                              |                     |                     | Unknown function      | Species specific |
| Candidatus Cenarchaeum massiliensis K8823_1570 | 95 hypothetical protein                              |                     |                     | Unknown function      | Species specific |
| Candidatus Cenarchaeum massiliensis K8823_1576 | 108 hypothetical protein                             |                     |                     | Unknown function      | Species specific |
| Candidatus Cenarchaeum massiliensis K8823_1578 | 95 Winged helix-turn helix domain-containing protein | IPR025959           |                     | Unknown function      | Species specific |
| Candidatus Cenarchaeum massiliensis K8823_1592 | 137 hypothetical protein                             |                     |                     | Unknown function      | Species specific |
| Candidatus Cenarchaeum massiliensis K8823_1597 | 103 DNA sulfur modification protein DnSE             | IPR014969           |                     | DNA modification      | Species specific |
| Candidatus Cenarchaeum massiliensis K8823_1601 | 98 Transposase                                       | IPR002525           |                     | Unknown function      | Species specific |
| Candidatus Cenarchaeum massiliensis K8823_1602 | 102 hypothetical protein                             |                     |                     | Unknown function      | Species specific |
| Candidatus Cenarchaeum massiliensis K8823_1613 | 136 hypothetical protein                             |                     |                     | Unknown function      | Species specific |
| Candidatus Cenarchaeum massiliensis K8823_1614 | 226 hypothetical membrane protein                    |                     |                     | Unknown function      | Species specific |
| Candidatus Cenarchaeum massiliensis K8823_160  | 885 hypothetical protein                             |                     |                     | Unknown function      | Species specific |
| Candidatus Cenarchaeum massiliensis K8823_1617 | 359 hypothetical protein                             |                     |                     | Unknown function      | Species specific |
| Candidatus Cenarchaeum massiliensis K8823_1618 | 49 transcriptional regulator AbrB family             | IPR007159;IPR007159 |                     | Transcription         | Species specific |
| Candidatus Cenarchaeum massiliensis K8823_161  | 245 hypothetical protein                             |                     |                     | Unknown function      | Species specific |
| Candidatus Cenarchaeum massiliensis K8823_1620 | 127 hypothetical protein                             |                     |                     | Unknown function      | Species specific |
| Candidatus Cenarchaeum massiliensis K8823_1623 | 164 hypothetical protein                             |                     |                     | Unknown function      | Species specific |
| Candidatus Cenarchaeum massiliensis K8823_1626 | 91 Transposase                                       | IPR003346           |                     | Unknown function      | Species specific |
| Candidatus Cenarchaeum massiliensis K8823_1627 | 73 hypothetical protein                              |                     |                     | Unknown function      | Species specific |
| Candidatus Cenarchaeum massiliensis K8823_162  | 121 hypothetical protein                             |                     |                     | Unknown function      | Species specific |
| Candidatus Cenarchaeum massiliensis K8823_1631 | 229 hypothetical protein                             |                     |                     | Unknown function      | Species specific |
| Candidatus Cenarchaeum massiliensis K8823_165  | 152 hypothetical protein                             |                     |                     | Unknown function      | Species specific |
| Candidatus Cenarchaeum massiliensis K8823_1654 | 100 hypothetical protein                             | IPR025959           |                     | Unknown function      | Species specific |
| Candidatus Cenarchaeum massiliensis K8823_166  | 219 hypothetical membrane protein                    |                     |                     | Unknown function      | Species specific |
| Candidatus Cenarchaeum massiliensis K8823_1686 | 125 hypothetical protein                             |                     |                     | Unknown function      | Species specific |
| Candidatus Cenarchaeum massiliensis K8823_1680 | 77 Transposase                                       | IPR002559           |                     | Unknown function      | Species specific |
| Candidatus Cenarchaeum massiliensis K8823_1681 | 128 Transposase                                      | IPR003346           |                     | Unknown function      | Species specific |
| Candidatus Cenarchaeum massiliensis K8823_1682 | 327 hypothetical protein                             |                     |                     | Unknown function      | Species specific |
| Candidatus Cenarchaeum massiliensis K8823_1683 | 77 Transposase                                       | IPR002559           |                     | Unknown function      | Species specific |
| Candidatus Cenarchaeum massiliensis K8823_1695 | 162 Isocitrate/isopropylmalate dehydrogenase         | K00052              | IPR024084;IPR001804 | Amino acid metabolism | Species specific |
| Candidatus Cenarchaeum massiliensis K8823_1696 | 186 2-isopropylmalate synthase                       | K01649              | IPR013709;IPR013709 | Misc                  | Species specific |
| Candidatus Cenarchaeum massiliensis K8823_173  | 143 hypothetical protein                             |                     |                     | Unknown function      | Species specific |
| Candidatus Cenarchaeum massiliensis K8823_174  | 137 hypothetical protein                             |                     |                     | Unknown function      | Species specific |
| Candidatus Cenarchaeum massiliensis K8823_182  | 44 cation-binding protein                            |                     |                     | Unknown function      | Species specific |
| Candidatus Cenarchaeum massiliensis K8823_190  | 101 hypothetical membrane protein                    |                     |                     | Unknown function      | Species specific |
| Candidatus Cenarchaeum massiliensis K8823_191  | 250 hypothetical protein                             |                     |                     | Unknown function      | Species specific |
| Candidatus Cenarchaeum massiliensis K8823_21   | 259 hypothetical protein                             |                     |                     | Unknown function      | Species specific |
| Candidatus Cenarchaeum massiliensis K8823_233  | 114 hypothetical protein                             |                     |                     | Unknown function      | Species specific |
| Candidatus Cenarchaeum massiliensis K8823_23   | 92 hypothetical protein                              |                     |                     | Unknown function      | Species specific |
| Candidatus Cenarchaeum massiliensis K8823_243  | 105 hypothetical protein                             |                     |                     | Unknown function      | Species specific |
| Candidatus Cenarchaeum massiliensis K8823_24   | 62 Transposase                                       | IPR002525           |                     | Unknown function      | Species specific |
| Candidatus Cenarchaeum massiliensis K8823_26   | 113 Transposase                                      | IPR002525           |                     | Unknown function      | Species specific |
| Candidatus Cenarchaeum massiliensis K8823_305  | 129 hypothetical membrane protein                    |                     |                     | Unknown function      | Species specific |
| Candidatus Cenarchaeum massiliensis K8823_29   | 109 hypothetical protein                             |                     |                     | Unknown function      | Species specific |
| Candidatus Cenarchaeum massiliensis K8823_30   | 590 hypothetical protein                             |                     |                     | Unknown function      | Species specific |
| Candidatus Cenarchaeum massiliensis K8823_346  | 205 hydrolase                                        | IPR003615;IPR002711 |                     | Unknown function      | Species specific |
| Candidatus Cenarchaeum massiliensis K8823_366  | 141 nitrous oxide reductase                          | IPR028096           |                     | Oxidation-reduction   | Species specific |
| Candidatus Cenarchaeum massiliensis K8823_369  | 163 restriction endonuclease                         | IPR019042           |                     | Misc                  | Species specific |
| Candidatus Cenarchaeum massiliensis K8823_371  | 145 hypothetical protein                             |                     |                     | Unknown function      | Species specific |
| Candidatus Cenarchaeum massiliensis K8823_372  | 63 hypothetical protein                              |                     |                     | Unknown function      | Species specific |
| Candidatus Cenarchaeum massiliensis K8823_373  | 49 hypothetical protein                              | IPR025959           |                     | Unknown function      | Species specific |
| Candidatus Cenarchaeum massiliensis K8823_375  | 95 hypothetical protein                              |                     |                     | Unknown function      | Species specific |
| Candidatus Cenarchaeum massiliensis K8823_376  | 107 hypothetical protein                             |                     |                     | Unknown function      | Species specific |
| Candidatus Cenarchaeum massiliensis K8823_377  | 152 hypothetical protein                             |                     |                     | Unknown function      | Species specific |
| Candidatus Cenarchaeum massiliensis K8823_383  | 310 hypothetical protein                             | IPR002793           |                     | Unknown function      | Species specific |
| Candidatus Cenarchaeum massiliensis K8823_32   | 100 hypothetical protein                             |                     |                     | Unknown function      | Species specific |
| Candidatus Cenarchaeum massiliensis K8823_385  | 86 hypothetical protein                              |                     |                     | Unknown function      | Species specific |
| Candidatus Cenarchaeum massiliensis K8823_415  | 77 hypothetical protein                              |                     |                     | Unknown function      | Species specific |
| Candidatus Cenarchaeum massiliensis K8823_419  | 128 hypothetical protein                             |                     |                     | Unknown function      | Species specific |
| Candidatus Cenarchaeum massiliensis K8823_440  | 62 hypothetical membrane protein                     |                     |                     | Unknown function      | Species specific |
| Candidatus Cenarchaeum massiliensis K8823_442  | 94 Transposase                                       | IPR002525           |                     | Unknown function      | Species specific |
| Candidatus Cenarchaeum massiliensis K8823_443  | 78 hypothetical protein                              |                     |                     | Unknown function      | Species specific |
| Candidatus Cenarchaeum massiliensis K8823_2    | 127 hypothetical protein                             |                     |                     | Unknown function      | Species specific |
| Candidatus Cenarchaeum massiliensis K8823_464  | 109 hypothetical protein                             |                     |                     | Unknown function      | Species specific |
| Candidatus Cenarchaeum massiliensis K8823_468  | 463 hypothetical protein                             |                     |                     | Unknown function      | Species specific |
| Candidatus Cenarchaeum massiliensis K8823_42   | 191 hypothetical membrane protein                    |                     |                     | Unknown function      | Species specific |
| Candidatus Cenarchaeum massiliensis K8823_43   | 217 hypothetical membrane protein                    |                     |                     | Unknown function      | Species specific |
| Candidatus Cenarchaeum massiliensis K8823_558  | 191 hypothetical protein                             |                     |                     | Unknown function      | Species specific |
| Candidatus Cenarchaeum massiliensis K8823_44   | 192 hypothetical protein                             |                     |                     | Unknown function      | Species specific |
| Candidatus Cenarchaeum massiliensis K8823_568  | 105 hypothetical protein                             |                     |                     | Unknown function      | Species specific |
| Candidatus Cenarchaeum massiliensis K8823_45   | 355 hypothetical protein                             |                     |                     | Unknown function      | Species specific |
| Candidatus Cenarchaeum massiliensis K8823_572  | 124 transposase                                      | IPR002525           |                     | Unknown function      | Species specific |
| Candidatus Cenarchaeum massiliensis K8823_573  | 62 hypothetical protein                              |                     |                     | Unknown function      | Species specific |
| Candidatus Cenarchaeum massiliensis K8823_46   | 288 hypothetical protein                             |                     |                     | Unknown function      | Species specific |
| Candidatus Cenarchaeum massiliensis K8823_582  | 34 hypothetical protein                              |                     |                     | Unknown function      | Species specific |
| Candidatus Cenarchaeum massiliensis K8823_4    | 142 hypothetical protein                             |                     |                     | Unknown function      | Species specific |
| Candidatus Cenarchaeum massiliensis K8823_651  | 177 hypothetical protein                             |                     |                     | Unknown function      | Species specific |
| Candidatus Cenarchaeum massiliensis K8823_632  | 103 hypothetical protein                             |                     |                     | Unknown function      | Species specific |
| Candidatus Cenarchaeum massiliensis K8823_652  | 971 LVIVD repeat-containing protein                  | IPR013211           |                     | Unknown function      | Species specific |
| Candidatus Cenarchaeum massiliensis K8823_654  | 225 Eco47II family restriction endonuclease          | IPR018057           |                     | DNA modification      | Species specific |
| Candidatus Cenarchaeum massiliensis K8823_656  | 2904 LVIVD repeat-containing protein                 | IPR013211           |                     | Unknown function      | Species specific |
| Candidatus Cenarchaeum massiliensis K8823_659  | 147 Transposase DDE domain protein                   |                     |                     | Unknown function      | Species specific |
| Candidatus Cenarchaeum massiliensis K8823_664  | 95 hypothetical protein                              | IPR025959           |                     | Unknown function      | Species specific |
| Candidatus Cenarchaeum massiliensis K8823_691  | 98 hypothetical protein                              | IPR004291           |                     | Unknown function      | Species specific |
| Candidatus Cenarchaeum massiliensis K8823_692  | 110 hypothetical membrane protein                    |                     |                     | Unknown function      | Species specific |
| Candidatus Cenarchaeum massiliensis K8823_695  | 110 hypothetical protein                             |                     |                     | Unknown function      | Species specific |
| Candidatus Cenarchaeum massiliensis K8823_698  | 131 hypothetical protein                             |                     |                     | Unknown function      | Species specific |
| Candidatus Cenarchaeum massiliensis K8823_700  | 122 Transposase                                      | IPR004291           |                     | Unknown function      | Species specific |
| Candidatus Cenarchaeum massiliensis K8823_712  | 90 hypothetical protein                              |                     |                     | Unknown function      | Species specific |
| Candidatus Cenarchaeum massiliensis K8823_713  | 177 hypothetical protein                             |                     |                     | Unknown function      | Species specific |
| Candidatus Cenarchaeum massiliensis K8823_716  | 263 hypothetical protein                             | IPR021398           |                     | Unknown function      | Species specific |
| Candidatus Cenarchaeum massiliensis K8823_717  | 100 hypothetical protein                             | IPR004291           |                     | Unknown function      | Species specific |
| Candidatus Cenarchaeum massiliensis K8823_720  | 75 hypothetical protein                              |                     |                     | Unknown function      | Species specific |
| Candidatus Cenarchaeum massiliensis K8823_749  | 31 hypothetical protein                              |                     |                     | Unknown function      | Species specific |
| Candidatus Cenarchaeum massiliensis K8823_752  | 184 hypothetical protein                             | IPR025959           |                     | Unknown function      | Species specific |
| Candidatus Cenarchaeum massiliensis K8823_758  | 72 Transposase                                       | IPR003346           |                     | Unknown function      | Species specific |
| Candidatus Cenarchaeum massiliensis K8823_759  | 105 Transposase                                      | IPR003346           |                     | Unknown function      | Species specific |

|                                               |                              |           |  |                  |                  |
|-----------------------------------------------|------------------------------|-----------|--|------------------|------------------|
| Candidatus Cenarchaeum massiliensis K8823_762 | 39 hypothetical protein      |           |  | Unknown function | Species specific |
| Candidatus Cenarchaeum massiliensis K8823_764 | 239 restriction endonuclease |           |  | Misc             | Species specific |
| Candidatus Cenarchaeum massiliensis K8823_765 | 126 hypothetical protein     |           |  | Unknown function | Species specific |
| Candidatus Cenarchaeum massiliensis K8823_766 | 75 hypothetical protein      |           |  | Unknown function | Species specific |
| Candidatus Cenarchaeum massiliensis K8823_767 | 95 hypothetical protein      |           |  | Unknown function | Species specific |
| Candidatus Cenarchaeum massiliensis K8823_772 | 114 hypothetical protein     | IPR014969 |  | DNA modification | Species specific |
| Candidatus Cenarchaeum massiliensis K8823_775 | 65 hypothetical protein      |           |  | Unknown function | Species specific |
| Candidatus Cenarchaeum massiliensis K8823_782 | 785 SIR2 family protein      |           |  | Unknown function | Species specific |
| Candidatus Cenarchaeum massiliensis K8823_785 | 158 hypothetical protein     |           |  | Unknown function | Species specific |
| Candidatus Cenarchaeum massiliensis K8823_787 | 147 Transposase              | IPR025225 |  | Unknown function | Species specific |
| Candidatus Cenarchaeum massiliensis K8823_791 | 62 hypothetical protein      | IPR025959 |  | Unknown function | Species specific |
| Candidatus Cenarchaeum massiliensis K8823_796 | 105 hypothetical protein     |           |  | Unknown function | Species specific |
| Candidatus Cenarchaeum massiliensis K8823_797 | 170 hypothetical protein     |           |  | Unknown function | Species specific |
| Candidatus Cenarchaeum massiliensis K8823_808 | 103 hypothetical protein     | IPR002559 |  | Unknown function | Species specific |
| Candidatus Cenarchaeum massiliensis K8823_809 | 118 hypothetical protein     |           |  | Unknown function | Species specific |
| Candidatus Cenarchaeum massiliensis K8823_810 | 282 hypothetical protein     |           |  | Unknown function | Species specific |
| Candidatus Cenarchaeum massiliensis K8823_861 | 106 hypothetical protein     |           |  | Unknown function | Species specific |
| Candidatus Cenarchaeum massiliensis K8823_866 | 137 hypothetical protein     |           |  | Unknown function | Species specific |

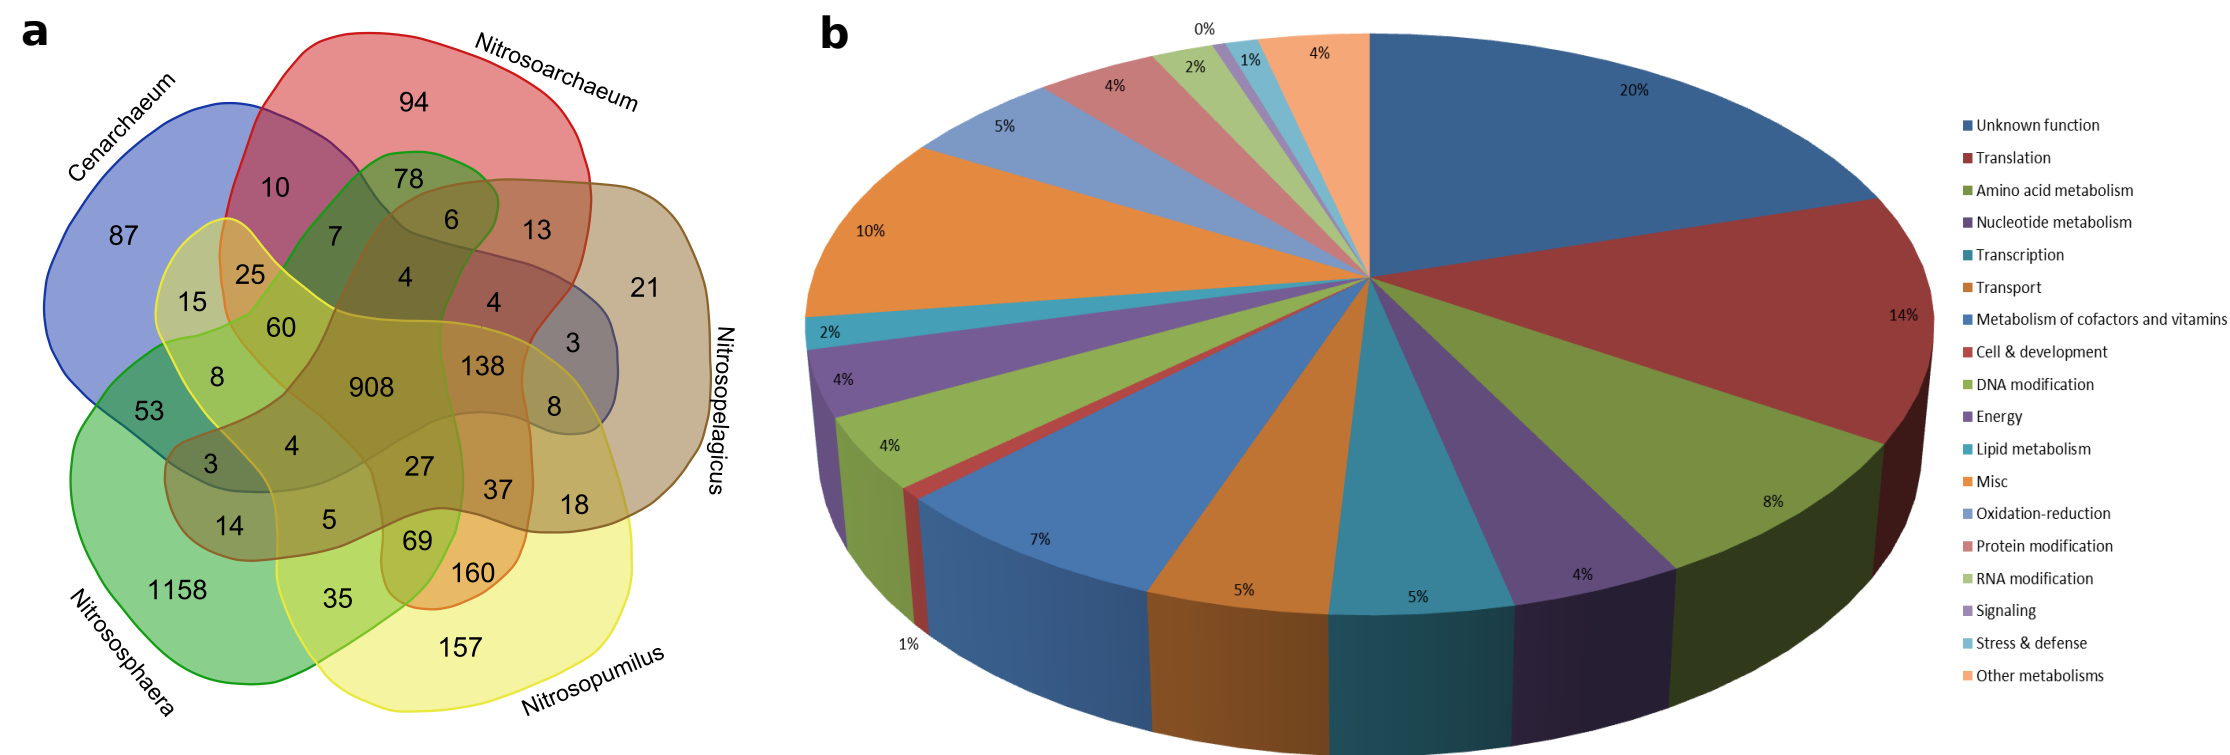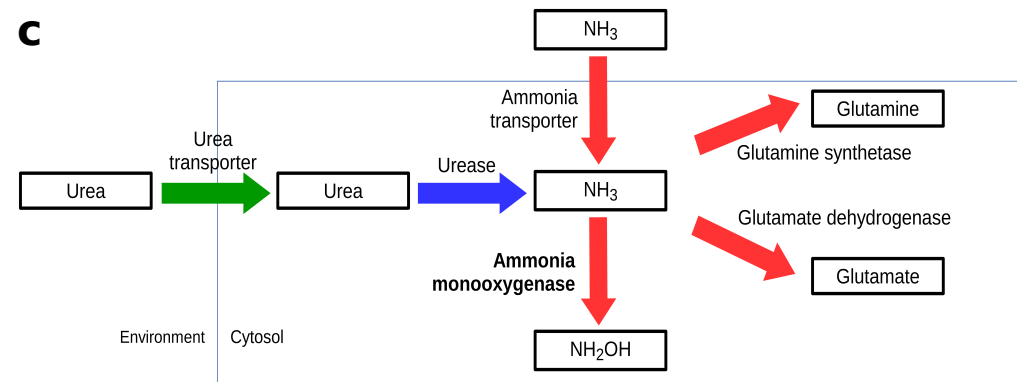

**Figure S2: Characterization of the genome of *Candidatus Cenarchaeum massiliensis*, the main symbiont of *O. minuta*, compared to other Thaumarchaeota species. **a** :Five-way-Venn-diagram illustrating orthologous genes clusters generated using OrthoMCL analysis on predicted proteins of *Cenarchaeum symbiosum* and *Cenarchaeum massiliensis* (blue circle), *Nitrosoarchaeum koreensis* and *Nitrosoarchaeum limnia*(red circle), *Nitrosopelagicus brevis* (brown circle), *Nitrosopumilus maritimus* and *Nitrosopumilus koreensis* (yellow circle) and three soil Thaumarchaeota (*Nitrososphaera viennensis*, *Nitrososphaera gargensis* and *Nitrososphaera evergladensis*; green circle). Venn-diagram is generated using a webtool (<http://bioinformatics.psb.ugent.be/webtools/Venn/>). **b**: Functional classes of the 908 Thaumarchaeota conserved gene families. **c**: The nitrogen metabolism in Thaumarchaeota. Conserved steps in all Thaumarchaeota (red arrows), conserved step only in soil Thaumarchaeota and *Cenarchaeum symbiosum* (blue arrow) and conserved step only in soil Thaumarchaeota (green arrow) are shown.**

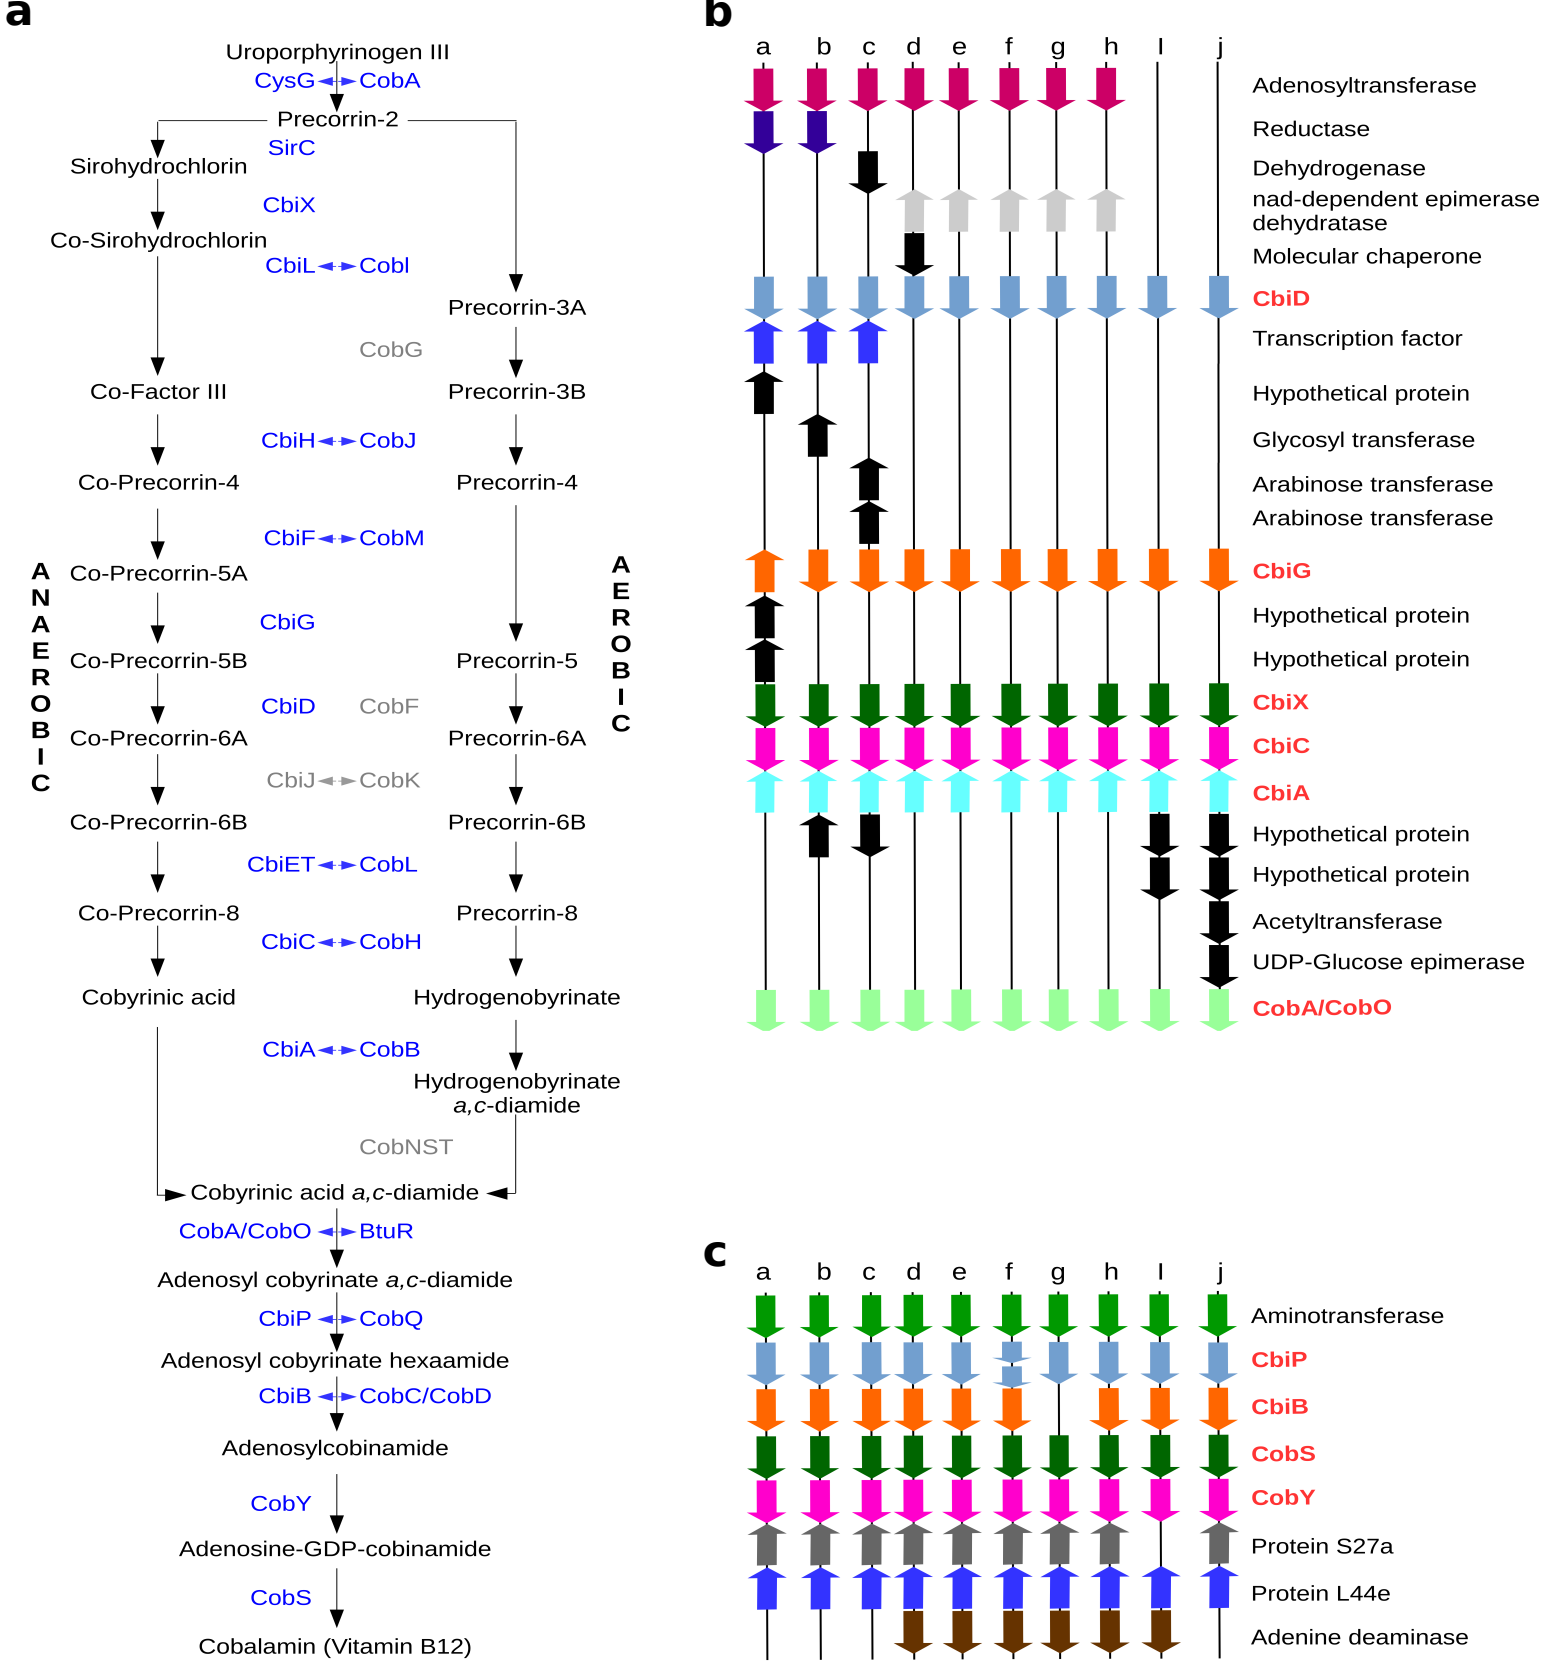

**Figure S3: The cobalamin synthesis genes in Thaumarchaeota.**  
**a:** Pathway of the cobalamin synthesis adapted from Doxey et al., 2015. Blue arrows indicate shared enzymatic steps between aerobic and anaerobic pathways. All enzymes of the anaerobic pathway are retrieved (indicated in blue) except CbiJ (indicated in grey). **b:** Microsynteny analysis of Thaumarchaeota genomic segments bearing six genes coding for early enzymatic steps of cobalamin synthesis. **c:** Microsynteny analysis of Thaumarchaeota genomic segments bearing four genes coding for late enzymatic steps of cobalamin synthesis. Segments "a" to "j" correspond to genomic segments from *Nitrososphaera gargensis*, *Nitrososphaera viennensis*, *Nitrososphaera evergladensis*, *Nitrosopelagicus brevis*, *Nitrosoarchaeum koreensis*, *Nitrosoarchaeum limnia*, *Nitrosopumilus koreensis*, *Nitrosopumilus maritimus*, *Cenarchaeum symbiosum* and *Candidatus Cenarchaeum massiliensis*, respectively. Arrows of the same color indicate orthologous genes and black arrows represent genes without orthology relationship in these regions from OrthoMCL analysis.

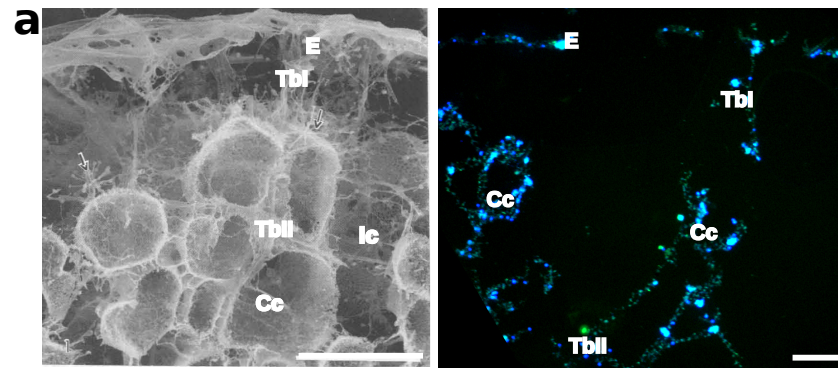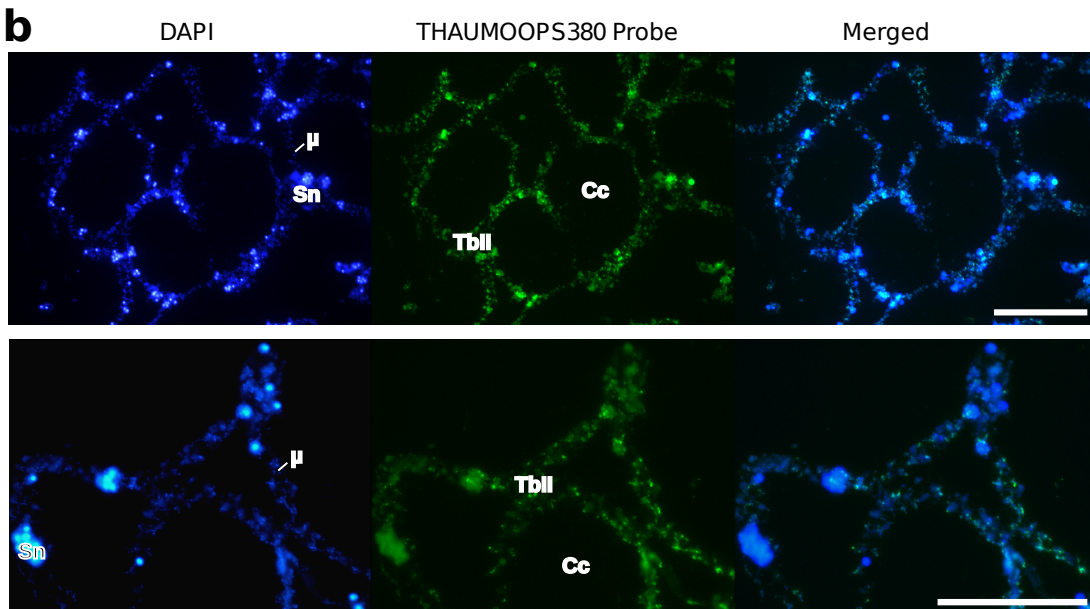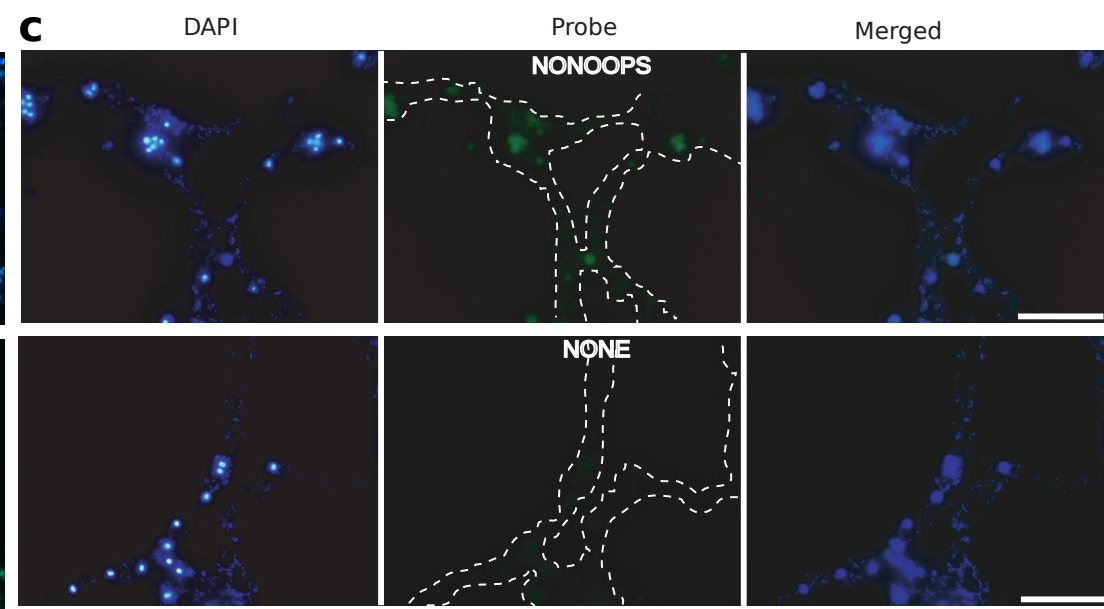

**Figure S4: Localization by Card-FISH of the thaumarchaeote *Candidatus Cenarchaeum massiliens* in the tissues of *Opsacas minuta*.** **a:** Confocal picture (on the right) showing its localization in the different parts of the trabecular syncytium (Tb) : the Ectosome (E) or dermal layer, the Choanochambers (CC) or flagellated chambers, the inhalant canals (Ic), recognized by comparison with SEM pictures (on the left) (Boury-Esnault and Vacelet, 1994) scale bars = 150  $\mu$ m. **b:** Localization in the trabecular syncytium shown at higher magnification in two different individuals with the THAUMOOPS380-HRP probe (green) and counterstained with DAPI (blue),  $\mu$ : microorganisms DNA, Sn: Sponge nuclei, scale bars = 70 $\mu$ m. **c:** Card-FISH negative controls: with a random probe with no 100% match in the metagenome (NONOOPS-HRP), or no probe, evidencing that sponge cells have an endogenous peroxidase activity uncompletely abolished by 0.3% H<sub>2</sub>O<sub>2</sub>.

1. Altschul SF, Gish W, Miller W, Myers EW, Lipman DJ. Basic local alignment search tool. *J Mol Biol.* 1990;215(3):403–10.
2. Zhu W, Lomsadze A, Borodovsky M. Ab initio gene identification in metagenomic sequences. *Nucleic Acids Res.* 2010;38(12):e132.
3. Chan PP, Lowe TM. tRNAscan-SE: Searching for tRNA Genes in Genomic Sequences. *Methods Mol Biol.* 2019;1962:1–14.
4. Stieglmeier M, Klingl A, Alves RJE, Rittmann SKMR, Melcher M, Leisch N, et al. *Nitrososphaera viennensis* gen. nov., sp. nov., an aerobic and mesophilic, ammonia-oxidizing archaeon from soil and a member of the archaeal phylum Thaumarchaeota. *Int J Syst Evol Microbiol.* 2014;64(Pt 8):2738–52.
5. Spang A, Poehlein A, Offre P, Zumbrägel S, Haider S, Rychlik N, et al. The genome of the ammonia-oxidizing *Candidatus Nitrososphaera gargensis*: insights into metabolic versatility and environmental adaptations. *Environ Microbiol.* 2012;14(12):3122–45.
6. Zhalnina KV, Dias R, Leonard MT, Dorr de Quadros P, Camargo FAO, Drew JC, et al. Genome sequence of *Candidatus Nitrososphaera evergladensis* from group I.1b enriched from Everglades soil reveals novel genomic features of the ammonia-oxidizing archaea. *PLoS One.* 2014;9(7):e101648.
7. Moriya Y, Itoh M, Okuda S, Yoshizawa AC, Kanehisa M. KAAS: an automatic genome annotation and pathway reconstruction server. *Nucleic Acids Res.* 2007;35:W182-185.
8. Fischer S, Brunk BP, Chen F, Gao X, Harb OS, Iodice JB, et al. Using OrthoMCL to assign proteins to OrthoMCL-DB groups or to cluster proteomes into new ortholog groups. *Curr Protoc Bioinformatics.* 2011;Chapter 6:6.12.1-6.12.19.
9. Conesa A, Götz S, García-Gómez JM, Terol J, Talón M, Robles M. Blast2GO: a universal tool for annotation, visualization and analysis in functional genomics research. *Bioinformatics.* 2005;21(18):3674–6.
10. Santoro AE, Dupont CL, Richter RA, Craig MT, Carini P, McIlvin MR, et al. Genomic and proteomic characterization of “*Candidatus Nitrosopelagicus brevis*”: an ammonia-oxidizing archaeon from the open ocean. *Proc Natl Acad Sci U S A.* 2015;112(4):1173–8.
11. Hallam SJ, Konstantinidis KT, Putnam N, Schleper C, Watanabe Y ichi, Sugahara J, et al. Genomic analysis of the uncultivated marine crenarchaeote *Cenarchaeum symbiosum*. *Proc Natl Acad Sci U S A.* 2006;103(48):18296–301.
12. Walker CB, de la Torre JR, Klotz MG, Urakawa H, Pinel N, Arp DJ, et al. *Nitrosopumilus maritimus* genome reveals unique mechanisms for nitrification and autotrophy in globally distributed marine crenarchaea. *Proc Natl Acad Sci U S A.* 2010;107(19):8818–23.
13. Park SJ, Kim JG, Jung MY, Kim SJ, Cha IT, Kwon K, et al. Draft genome sequence of an ammonia-oxidizing archaeon, “*Candidatus Nitrosopumilus koreensis*” AR1, from marine sediment. *J Bacteriol.* 2012;194(24):6940–1.
14. Blainey PC, Mosier AC, Potanina A, Francis CA, Quake SR. Genome of a low-salinity ammonia-oxidizing archaeon determined by single-cell and metagenomic analysis. *PLoS One.* 2011;6(2):e16626.

15. Kim BK, Jung MY, Yu DS, Park SJ, Oh TK, Rhee SK, et al. Genome sequence of an ammonia-oxidizing soil archaeon, "*Candidatus Nitrosoarchaeum koreensis*" MY1. *J Bacteriol.* 2011;193(19):5539-40.
16. Doxey AC, Kurtz DA, Lynch MDJ, Sauder LA, Neufeld JD. Aquatic metagenomes implicate Thaumarchaeota in global cobalamin production. *ISME J.* 2015;9(2):461-71.
