# Supplementary material for: The compact genome of the sponge Oopsacas minuta (Hexactinellida) is lacking key metazoan core genes
Source: PubMed Central journal article supplement (PMC10280926; doi:10.1186/s12915-023-01619-w), 2023-06-19
Supplement: 12915_2023_1619_MOESM2_ESM.pdf [file 12915_2023_1619_MOESM2_ESM.pdf]

## **Additional File 2 Index**

**Tables S5 :** *Genome features of the glass sponge O. minuta, compared to other sponges from the three other classes*

**Table S6 :** *Respective number of predicted and annotated sequences in the genome of O. minuta*

**Figure S5:** *Gene ontology at the first two levels for the 7,737 genes that received GO annotations*

**Figures S6 :** *a) Orthology clustering on predicted proteomes of six sponges. b) Gene Ontology at level 3 for orthogroups absent in O. minuta and present in all other sponge lineages*

**Table S7:** *ORFING report, Comparison of protein sequence lengths and BUSCO scores between the different versions of the genome masked or unmasked*

**Table S8:** *Types and relative abundances of repeats in the genome of O. minuta*

**Table S5a: Genome features of the glass sponge *O. minuta*, compared to other sponges from the three other classes.** Table modified from Kenny et al., 2020 by adding Busco (Simao et al 2015) results (BUSCO v2/v3) for *O. minuta* using the Eukaryota OrthoDB v9 core genes set and computed on the gVolante server.

| species                                                 | Hexactinellida                    |                                       | Demospongiae                     |                                         |                         |                    | Homoscleromorpha  | Calcarea           |
|---------------------------------------------------------|-----------------------------------|---------------------------------------|----------------------------------|-----------------------------------------|-------------------------|--------------------|-------------------|--------------------|
|                                                         | <i>O. minuta</i><br>(genome mode) | <i>O. minuta</i><br>(Augustus aa set) | <i>E. muelleri</i> (genome mode) | <i>E. muelleri</i><br>(Augustus aa set) | <i>A. queenslandica</i> | <i>T. wilhelma</i> | <i>O. pearsei</i> | <i>S. ciliatum</i> |
| Total # of core genes queried                           | 303                               | 303                                   | 303                              | 303                                     | 303                     | 303                | 303               | 303                |
| # of core genes detected                                | 282 (93.07%)                      | 278 (91.75%)                          | 243 (80.20%)                     | 254 (83.83%)                            | 274 (90.43%)            | 258 (85.15%)       | 207 (68.32%)      | 240 (79.21%)       |
| Complete + Partial                                      | 285 (94.06%)                      | 284 (93.73%)                          | 254 (83.83%)                     | 273 (90.10%)                            | 281 (92.74%)            | 275 (90.76%)       | 237 (78.22%)      | 259 (85.48%)       |
| # of missing core genes                                 | 18 (5.94%)                        | 19 (6.27%)                            | 49 (16.17%)                      | 30 (9.90%)                              | 22 (7.26%)              | 28 (9.24%)         | 66 (21.78%)       | 44 (14.52%)        |
| Average # of orthologues per core genes                 | 1.01                              | 1.01                                  | 1.12                             | 1.22                                    | 1.04                    | 1.05               | 1                 | 1.07               |
| % of detected core genes that have more than 1 ortholog | 1.06                              | 0.72                                  | 10.7                             | 19.6                                    | 4.38                    | 4.26               | 0                 | 6.67               |

**Table S5b: Mean size of coding and non-coding sequences in *O. minuta* compared to two demosponges**

Statistics are from the current *O. minuta* genome and two Demospongiae genomes used for Busco computation (genome source can be found in the main text).

|                                      | Hexactinellida         |                           | Demospongiae                           |
|--------------------------------------|------------------------|---------------------------|----------------------------------------|
|                                      | <i>Oopsacas minuta</i> | <i>Ephydatia muelleri</i> | <i>Amphimedon queenslandica</i> (V2.1) |
| Number of predicted proteins         | 16413                  | 39245                     | 43615                                  |
| Mean protein length (aa residues)    | 425.2                  | 497.66                    | 337.84                                 |
| Maximum protein length (aa residues) | 13808                  | 37921                     | 18893                                  |
| Minimum protein length (aa residues) | 43                     | 10                        | 5                                      |
| Mean number of introns per gene      | 1.59                   | 3.009                     | 2.01                                   |
| Mean intron size (bp)                | 341.2                  | 361.49                    | 327.62                                 |
| Median intron size (bp)              | 139.5                  | 138                       | 70                                     |
| Mean gene size (bp)                  | 1806                   | 4507.53                   | 2425.68                                |
| Mean inter-gene distance (bp)        | 2001                   | 3524.79                   | 2145.72                                |

**Table S6: Respective number of predicted and annotated sequences in the genome of *O. minuta***  
See methods for any details on the gene prediction.

| Categories      | Number       |              |
|-----------------|--------------|--------------|
| predicted genes | 16413        |              |
| Annotated Genes | 7737         |              |
| GO Terms        | Biological   | 4092         |
|                 | Cellular     | 2042         |
|                 | Function     | 6704         |
|                 | <b>Total</b> | <b>12838</b> |

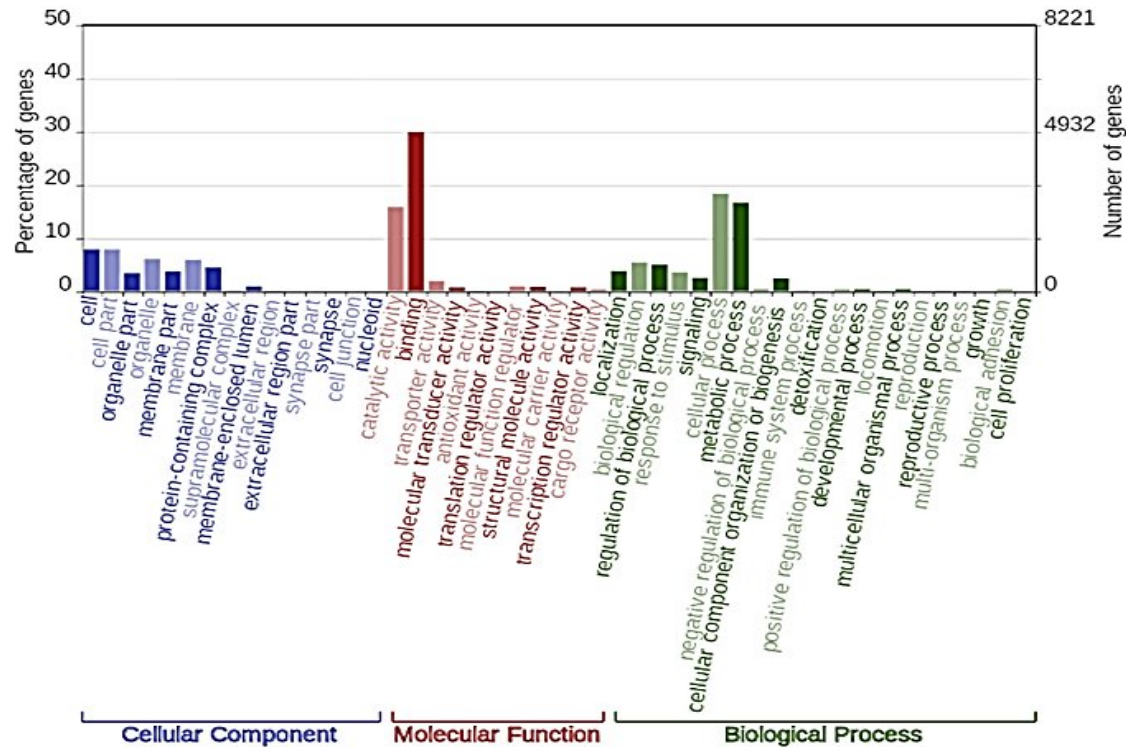

**Figure S5: Gene ontology at the first two levels for the 7,737 genes that received GO annotations.**

GO inferred via a domain search using InterProScan (Quevillon et al 2005) against the conserved domain database at NCBI.

GO identifiers were used on WEGO (<http://wego.genomics.org.cn/>).

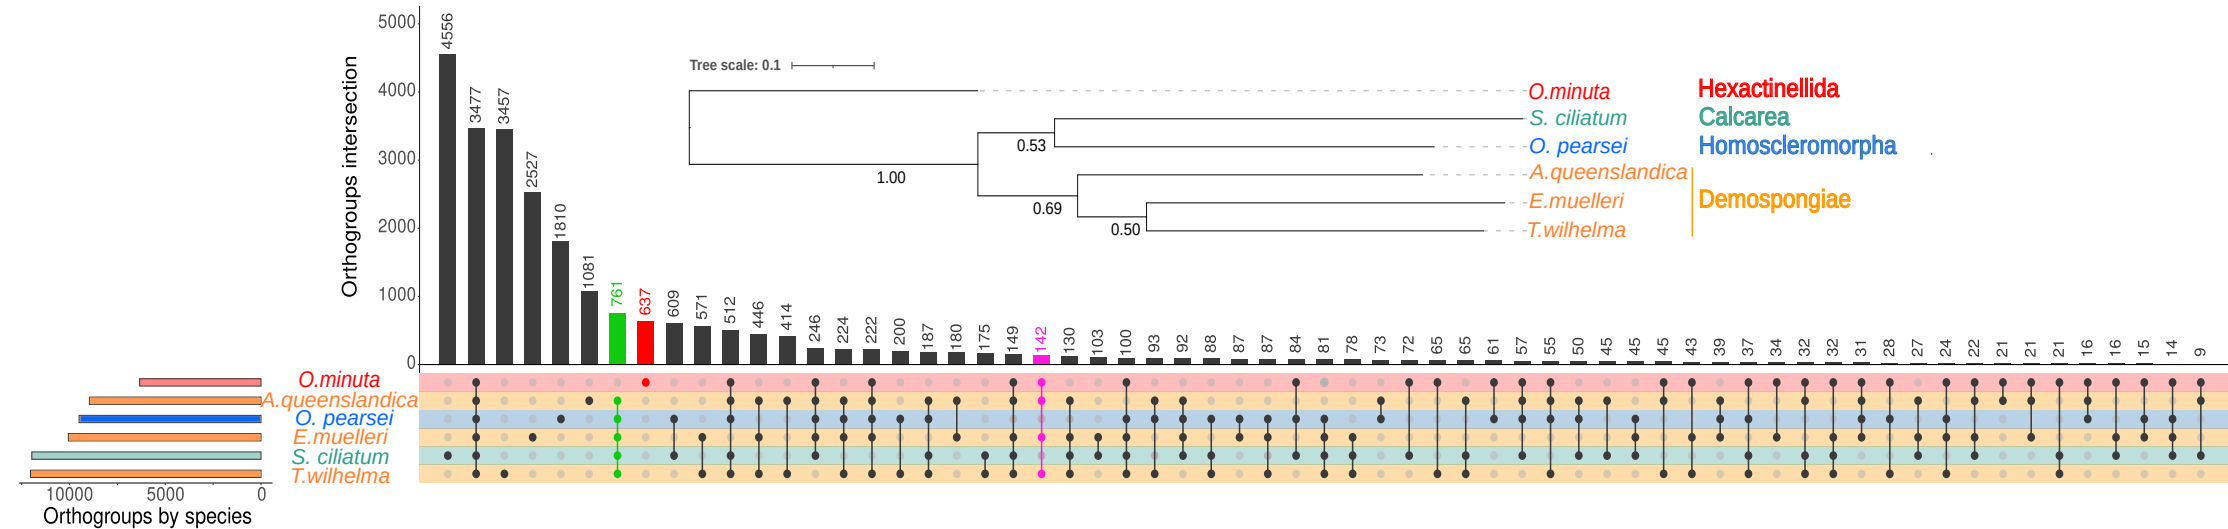

**Figure S6a: Orthology clustering on predicted proteomes of six sponges** pertaining to the four sponge classes. Orthogroups were computed using Orthofinder (Emms & Kelly 2019). The figure was generated with the R module UpSetR (<https://CRAN.R-project.org/package=UpSetR>) on the basis of the Orthogroups.GeneCount.tsv simplified to take into account only the presence/absence of a species in an orthogroup and iTOL (Letunic & Bork 2021) based on the SpeciesTree\_rooted.txt output files from Orthofinder.

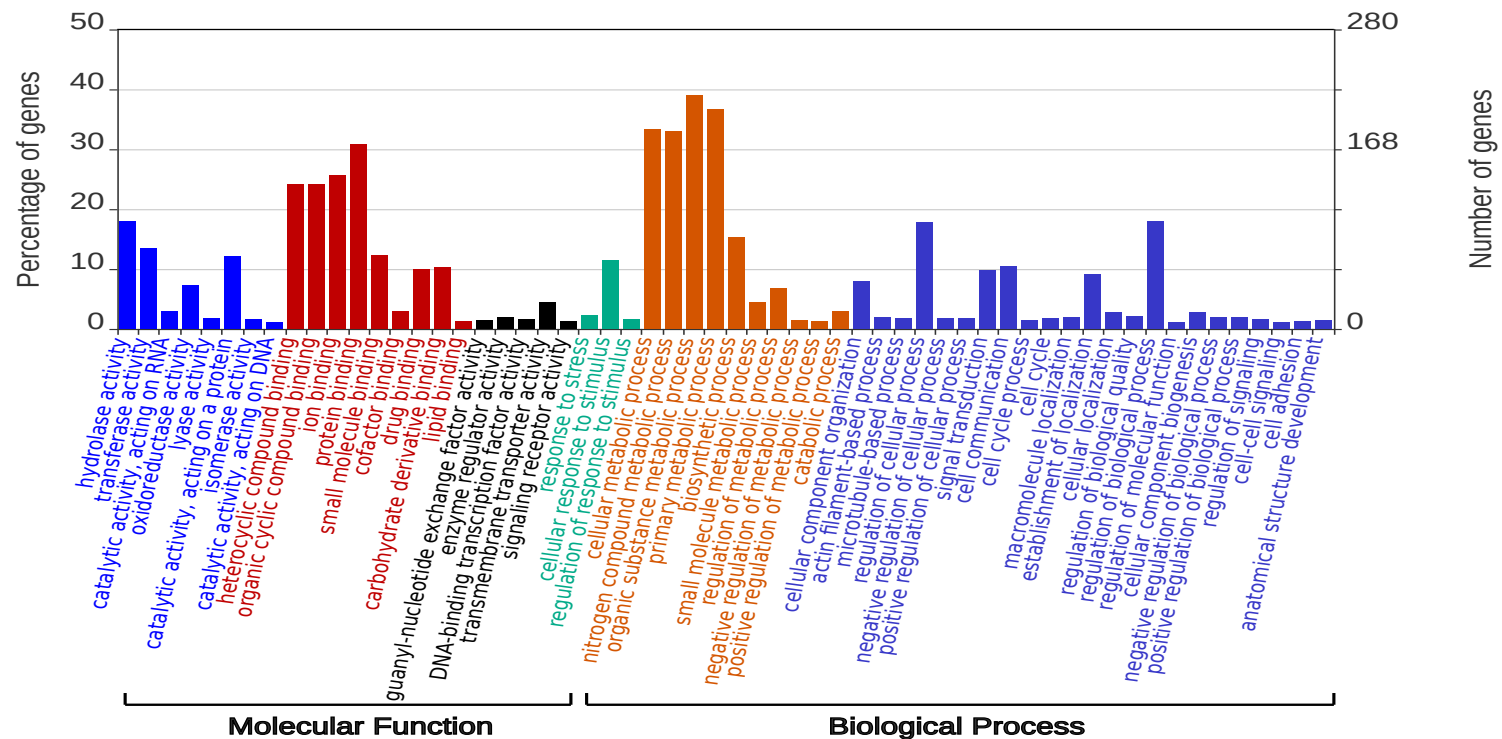

**Figure S6b: Gene Ontology at level 3 for orthogroups absent in *O. minuta* and present in all other sponge lineages (if >1%)** GO inferred via a domain search using InterProScan (Quevillon et al 2005) against the conserved domain database at NCBI. GO identifiers were used on WEGO (<http://wego.genomics.org.cn/>) Main functional categories are represented by different colors to make visualization easier. .

**Table S7: ORFING report, Comparison of protein sequence lengths and BUSCO scores between the different versions of the genome masked or unmasked.**

| dataset                              | #sequences   | Longest      | Shortest  | Mean       | Median     | Complete Busco | Partial Busco | Busco Score                                        |
|--------------------------------------|--------------|--------------|-----------|------------|------------|----------------|---------------|----------------------------------------------------|
| <b>GCA_024704765.1_ASM2470476v1*</b> | <b>16413</b> | <b>13808</b> | <b>43</b> | <b>425</b> | <b>301</b> | <b>278</b>     | <b>284</b>    | <b>C:91.8%[S:90.8%,D:1.0%],F:2.0%,M:6.2%,n:303</b> |
| uncleaned unmasked                   | 17059        | 13808        | 38        | 429        | 303        | 278            | 284           | C:91.7%[S:89.4%,D:2.3%],F:2.0%,M:6.3%,n:303        |
| uncleaned hardmasked no low          | 11932        | 15060        | 38        | 502        | 360        | 277            | 282           | C:91.4%[S:89.1%,D:2.3%],F:1.7%,M:6.9%,n:303        |
| uncleaned hardmasked                 | 11600        | 12346        | 39        | 510        | 365        | 273            | 281           | C:90.1%[S:87.5%,D:2.6%],F:2.6%,M:7.3%,n:303        |
| uncleaned softmasked no low          | 16668        | 15597        | 38        | 436        | 311        | 278            | 285           | C:91.7%[S:88.1%,D:3.6%],F:2.3%,M:6.0%,n:303        |
| uncleaned softmasked                 | 16371        | 15257        | 38        | 442        | 316        | 278            | 284           | C:91.8%[S:88.8%,D:3.0%],F:2.0%,M:6.2%,n:303        |

C: complete  
S: complete and single copy  
D: complete and duplicated  
F: fragmented  
M: missing  
n: total search

\* version analysed in this work

**Table S8 : Types and relative abundances of repeats predicted in the genome of *O. minuta*.** Repeats were predicted and analysed with RepeatModeler 2.0.4 and RepeatMasker 4.1.4 (default mode) (<http://www.repeatmasker.org> ) from the Dfam TEtool container <https://github.com/Dfam-consortium/TETools>

|                                    | number of elements* | length occupied | percentage of sequence |
|------------------------------------|---------------------|-----------------|------------------------|
| Retroelements                      | 967                 | 402918 bp       | 0.66 %                 |
| SINEs:                             | 0                   | 0 bp            | 0.00 %                 |
| Penelope                           | 0                   | 0 bp            | 0.00 %                 |
| LINEs:                             | 0                   | 0 bp            | 0.00 %                 |
| CRE/SLACS                          | 0                   | 0 bp            | 0.00 %                 |
| L2/CR1/Rex                         | 0                   | 0 bp            | 0.00 %                 |
| R1/LOA/Jockey                      | 0                   | 0 bp            | 0.00 %                 |
| R2/R4/NeSL                         | 0                   | 0 bp            | 0.00 %                 |
| RTE/Bov-B                          | 0                   | 0 bp            | 0.00 %                 |
| L1/CIN4                            | 0                   | 0 bp            | 0.00 %                 |
| LTR elements:                      | 967                 | 402918 bp       | 0.66 %                 |
| BEL/Pao                            | 0                   | 0 bp            | 0.00 %                 |
| Ty1/Copia                          | 576                 | 85338 bp        | 0.14 %                 |
| Gypsy/DIRS1                        | 391                 | 317580 bp       | 0.52 %                 |
| Retroviral                         | 0                   | 0 bp            | 0.00 %                 |
| DNA transposons                    | 16375               | 9486879 bp      | 15.44 %                |
| hobo-Activator                     | 3729                | 1655397 bp      | 2.69 %                 |
| Tc1-IS630-Pogo                     | 5265                | 3313939 bp      | 5.39 %                 |
| En-Spm                             | 0                   | 0 bp            | 0.00 %                 |
| MULE-MuDR                          | 1296                | 572590 bp       | 0.93 %                 |
| PiggyBac                           | 0                   | 0 bp            | 0.00 %                 |
| Tourist/Harbinger                  | 171                 | 170952 bp       | 0.28 %                 |
| Other (Mirage, P-element, Transib) | 1552                | 748427 bp       | 1.22 %                 |
| Rolling-circles                    | 148                 | 83011 bp        | 0.14 %                 |
| Unclassified:                      | 64870               | 11067513 bp     | 18.01 %                |
| Total interspersed repeats:        |                     | 20957310 bp     | 34.10 %                |
| Small RNA:                         | 0                   | 0 bp            | 0.00 %                 |
| Satellites:                        | 0                   | 0 bp            | 0.00 %                 |
| Simple repeats:                    | 7816                | 364942 bp       | 0.59 %                 |
| Low complexity:                    | 910                 | 45186 bp        | 0.07 %                 |

\* most repeats fragmented by insertions or deletions have been counted as one element

1. Kenny NJ, Francis WR, Rivera-Vicéns RE, Juravel K, de Mendoza A, Díez-Vives C, et al. Tracing animal genomic evolution with the chromosomal-level assembly of the freshwater sponge *Ephydatia muelleri*. *Nat Commun.* 2020;11(1):3676.
2. Simão FA, Waterhouse RM, Ioannidis P, Kriventseva EV, Zdobnov EM. BUSCO: assessing genome assembly and annotation completeness with single-copy orthologs. *Bioinformatics.* 2015;31(19):3210–2.
3. Quevillon E, Silventoinen V, Pillai S, Harte N, Mulder N, Apweiler R, et al. InterProScan: protein domains identifier. *Nucleic Acids Res.* 2005;33:W116-120.
4. Emms DM, Kelly S. OrthoFinder: phylogenetic orthology inference for comparative genomics. *Genome Biology.* 2019;20(1):238.
5. Letunic I, Bork P. Interactive Tree Of Life (iTOL) v5: an online tool for phylogenetic tree display and annotation. *Nucleic Acids Research.* 2021;49(W1):W293–6.
