# Supplementary material for: The compact genome of the sponge Oopsacas minuta (Hexactinellida) is lacking key metazoan core genes
Source: PubMed Central journal article supplement (PMC10280926; doi:10.1186/s12915-023-01619-w), 2023-06-19
Supplement: 12915_2023_1619_MOESM3_ESM.pdf [file 12915_2023_1619_MOESM3_ESM.pdf]

## **Additional File 3 Index**

**Table S9** : Blastp search of proteins involved in bilaterian epithelial functions.

**Figures S7** : Domain prediction of integrins and of laminins

**Table S10** : Blastp search concerning proteins involved in bilaterian multiciliogenesis.

**Table S11** : Blast Search of core genes involved in three main ancestral signalling pathways.

**Table S12** : Blastp search results concerning G-proteins.

**Table S13** : Blastp search and protein domain analyses concerning basic Helix Loop Helix (bHLH) transcription factors

**Figure S8** : Phylogenetic position of *Oopsacas* bHLH TF

**Figure S9** : Phylogenetic position of *Oopsacas* bHLH-PAS TF

**Table S14** : Summary of blast search results concerning homeobox transcription factors

**Figure S10** : Prediction of protein domains of HD transcription factors

**Figure S11** : Phylogenetic position of *Oopsacas* HD TF of the ANTP class

**Table S15** : Survey of candidate genes for photoreception

**Table S16** : Blast searches for proteins involved in chemical signaling

**Table S17** : HHMER search results for voltage gated ion channels

**Figure S12** : Phylogenetic positions of *Oopsacas* calcium channels

**Figure S13** : Phylogenetic positions of *Oopsacas* potassium channels

**Table S18** : Blastp search of genes involved in bilaterian synapses

**Table S19** : HMMER search of SNARES

**Table S20** : Blastp search of proteins involved in silica biogenesis

**Table S21** : List of sequences used for phylogenetic analyses of silicatein and cathepsin

**Table S9: Blast P search of proteins involved in bilaterian epithelial functions (only genes with highly significant hits are indicated)**

| Query            |                                                                                  | Blast P vs. oopsacas proteome | reverse blast-p result against NR, best hit providing an annotated protein                |       |       |           |          |                       |
|------------------|----------------------------------------------------------------------------------|-------------------------------|-------------------------------------------------------------------------------------------|-------|-------|-----------|----------|-----------------------|
| searched protein | query sequence (species/accession number)                                        | <i>O. minuta</i> locus tag    | description                                                                               | score | cover | e-value   | identity | accession number      |
| Contactin        | <i>Contactin (Aphrocalistes vastus) / Ava_Contig_16553-1</i>                     | LOD99_12497                   | <i>Contactin-2 [Mugil cephalus]</i>                                                       | 186   | 95%   | 2.00E-44  | 24.62%   | XP_047440236.1 (NCBI) |
|                  |                                                                                  | LOD99_4945                    | <i>Protein sidekick-1 isoform X3 [Danio rerio]</i>                                        | 234   | 92%   | 3.00E-58  | 24.56%   | XP_017211455.1 (NCBI) |
|                  |                                                                                  | LOD99_2903                    | <i>Neural cell adhesion molecule L1-like [Lytechinus variegatus]</i>                      | 286   | 62%   | 4.00E-74  | 27.87%   | XP_041470985.1 (NCBI) |
|                  |                                                                                  | LOD99_13407                   | <i>Dscam2 isoform X1 [Bombyx mori]</i>                                                    | 234   | 61%   | 3.00E-58  | 25.77%   | XP_012543882.3 (NCBI) |
| Integrin         | <i>Integrin alpha (Aphrocalistes vastus) / Ava_Contig_11100-1_and 11100-2</i>    | LOD99_15309                   | <i>Integrin alpha-9-like [Amphimedon queenslandica]</i>                                   | 347   | 99%   | 3.00E-98  | 29.16%   | XP_019864024.1 (NCBI) |
|                  |                                                                                  | LOD99_15308                   | <i>Integrin alpha-9-like [Amphimedon queenslandica]</i>                                   | 344   | 98%   | 4.00E-97  | 28.32%   | XP_019864024.1 (NCBI) |
|                  |                                                                                  | LOD99_13917                   | <i>Integrin alpha-V [Xiphophorus couchianus]</i>                                          | 249   | 99%   | 2.00E-64  | 26.38%   | XP_027878087.1 (NCBI) |
|                  |                                                                                  | LOD99_9146                    | <i>Integrin alpha-PS2-like [Limulus polyphemus]</i>                                       | 283   | 96%   | 8.00E-76  | 27.46%   | XP_022250303.1 (NCBI) |
|                  | <i>Integrin beta (Aphrocalistes vastus) / Ava_Contig_13475-2_integrin-beta-1</i> | LOD99_6533                    | <i>Integrin alpha-8-like [Scyliorhinus canicula]</i>                                      | 178   | 95%   | 3.00E-41  | 23.96%   | XP_038635355.1 (NCBI) |
|                  |                                                                                  | LOD99_8099                    | <i>Integrin beta-7 [Microcaecilia unicolor]</i>                                           | 447   | 95%   | 1.00E-141 | 34.29%   | XP_030054041.1 (NCBI) |
|                  |                                                                                  | LOD99_2393                    | <i>integrin beta-C subunit precursor [Strongylocentrotus purpuratus]</i>                  | 322   | 98%   | 7.00E-94  | 29.26%   | NP_999730.1 (NCBI)    |
|                  |                                                                                  | LOD99_12882                   | <i>ITB2 protein [Penelope pileata]</i>                                                    | 230   | 91%   | 3.00E-63  | 32.11%   | NXC50956.1 (NCBI)     |
| Nidogen          | <i>Nidogen (A. vastus) / Ava_Contig_19310_nidogen</i>                            | LOD99_13205                   | <i>Protogenin-like protein [Leptotrombidium deliense]</i>                                 | 80.5  | 54%   | 2.00E-11  | 27.09%   | RWS24579.1 (NCBI)     |
|                  |                                                                                  | LOD99_13214                   | <i>receptor-type tyrosine-protein phosphatase epsilon-like [Amphimedon queenslandica]</i> | 275   | 13%   | 3.00E-74  | 47.94%   | XP_011404097.2        |
| Laminin          | <i>Laminin beta (A. vastus) / Ava_Contig_18402_Laminin-beta</i>                  | LOD99_7300                    | <i>laminin subunit gamma-1-like [Amphimedon queenslandica]</i>                            | 779   | 98%   | 0.0       | 30.45%   | XP_019849782.1 (NCBI) |
|                  |                                                                                  | LOD99_12851                   | <i>Laminin subunit gamma-1-like [Acropora millepora]</i>                                  | 807   | 98%   | 0.0       | 29.12%   | XP_044175181.1 (NCBI) |
|                  |                                                                                  | LOD99_7636                    | <i>Laminin-like protein epi-1 [Acropora millepora]</i>                                    | 892   | 77%   | 0.0       | 28.06%   | XP_044182513.1 (NCBI) |
|                  |                                                                                  | LOD99_1235                    | <i>Laminin subunit beta-1-like [Dermatophagoides farinae]</i>                             | 281   | 47%   | 4.00E-72  | 33.89%   | XP_046909188.1 (NCBI) |
|                  |                                                                                  | LOD99_8477                    | <i>Usherin-like [Amphimedon queenslandica]</i>                                            | 1246  | 98%   | 0.0       | 35.50%   | XP_011403870.2 (NCBI) |

present

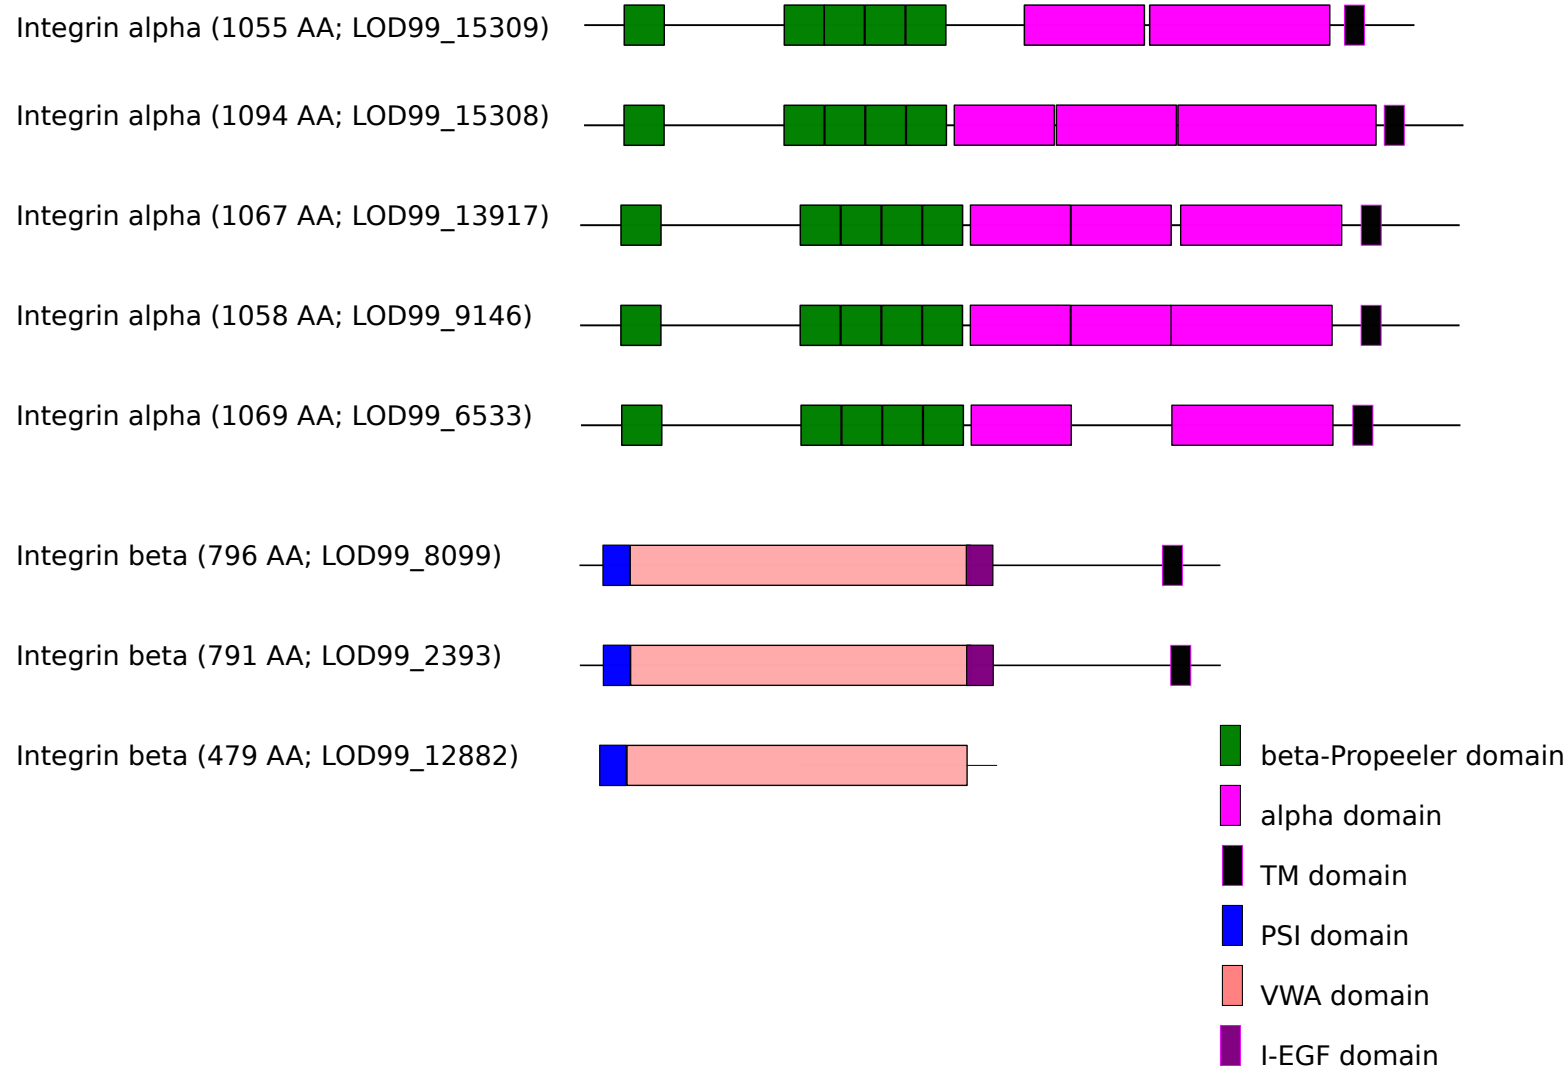

**Figure S7a: Domain prediction of *Oopsacas* integrins** using Pfam. 5 predicted alpha-integrins of *O. minuta* have a domain structure similar to those observed in other metazoans: a globular head region in the extracellular domain consisting in five or six repeats of about 60 amino acids that fold into a five/six-bladed  $\beta$  propeller followed by a large integrin alpha-2 domain. The 3 proteins predicted as beta-integrins share an integrin plexin domain (PSI) in the Nt globular part, an integrin beta chain VWA domain, an integrin beta epidermal growth factor like domain 1 as reported in other metazoans.

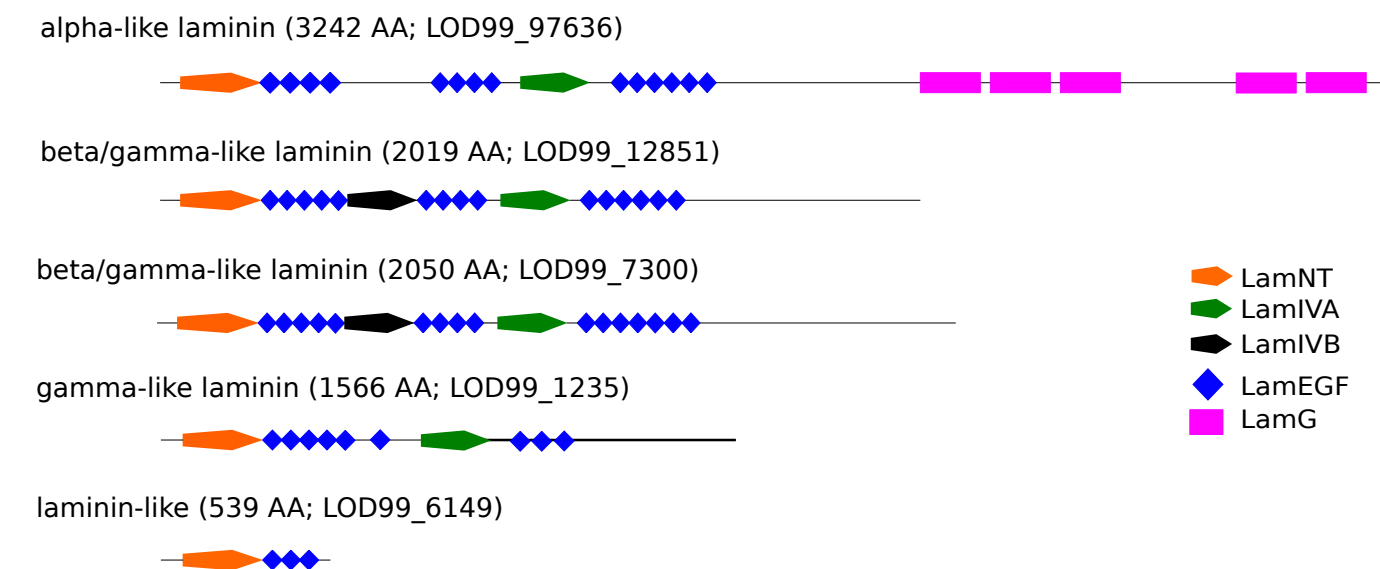

**Figure S7b: Protein Domain prediction of *Oopsacas* laminins** using Pfam

**Table S10: Blastp search concerning proteins involved in bilaterian multiciliogenesis** (only locus tags of sequences with e-value<10<sup>-2</sup> are provided; reverse best blast hits were performed against NCBI NR database)

| searched protein | query sequence (species/accession number)                                                    | <i>O.minuta</i> locus tag | reverse blast-p result against NR, best hit providing an annotated protein         |       |       |           |          |                  |
|------------------|----------------------------------------------------------------------------------------------|---------------------------|------------------------------------------------------------------------------------|-------|-------|-----------|----------|------------------|
|                  |                                                                                              |                           | description                                                                        | score | cover | e-value   | identity | accession number |
| DEUP 1           | <i>Xenopus tropicalis</i> /XP_002940187.1                                                    | -                         |                                                                                    |       |       |           |          |                  |
|                  | <i>Xenopus laevis</i> /JAG34037.1                                                            | -                         |                                                                                    |       |       |           |          |                  |
| CEP63            | <i>Amphimedon queenslandica</i> /XP_019856539.1                                              | -                         |                                                                                    |       |       |           |          |                  |
|                  | <i>Xenopus laevis</i> /NP_001121276.1                                                        | -                         |                                                                                    |       |       |           |          |                  |
| multicilin       | <i>Xenopus tropicalis</i> /XP_017952870.2                                                    | -                         |                                                                                    |       |       |           |          |                  |
| pericentrin      | <i>Xenopus laevis</i> /NP_001086706.1                                                        | -                         |                                                                                    |       |       |           |          |                  |
| E2F4             | <i>Xenopus laevis</i> /NP_001083644.1<br><i>Amphimedon queenslandica</i> /Larroux et al.2008 | LOD99_7024                | transcription factor E2F3 [Cyclopterus lumpus]                                     | 87.8  | 45%   | 3.00E-15  | 32.46%   | XP_034401885.1   |
|                  |                                                                                              | LOD99_13394               | E2F_TDP-domain-containing protein [Fragilariopsis cylindrus CCMP1102]              | 76.6  | 58%   | 5.00E-12  | 24.63%   | OEU15276.1       |
|                  |                                                                                              | LOD99_9296                | Fork head domain [Trinorchestia longiramus]                                        | 166   | 36%   | 2.00E-48  | 69.23%   | KAF2348946.1     |
|                  |                                                                                              | LOD99_4349                | forkhead foxL2 [Suberites domuncula]                                               | 199   | 34%   | 6.00E-58  | 74.80%   | CAE51212.1       |
| FOXJ1            | <i>Xenopus laevis</i> /NP_001083644.1<br><i>Amphimedon queenslandica</i> /Larroux et al.2008 | LOD99_3851                | forkhead box protein J3-like isoform X2 [Limulus polyphemus]                       | 125   | 87%   | 4.00E-29  | 29.43%   | XP_013784418.2   |
|                  |                                                                                              | LOD99_5974                | PREDICTED: forkhead box protein L2-like [Amphimedon queenslandica]                 | 180   | 46%   | 7.00E-50  | 58.06%   | XP_019858441.1   |
|                  |                                                                                              | LOD99_2423                | Forkhead box protein P1 [Habropoda laboriosa]                                      | 187   | 46%   | 4.00E-46  | 37.60%   | KOC66408.1       |
|                  |                                                                                              | LOD99_6831                | Forkhead box protein O [Exaiptasia diaphana]                                       | 154   | 22%   | 5.00E-38  | 51.28%   | KXJ17066.1       |
| RX2/3            | <i>Xenopus laevis</i> /NP_001090132.1                                                        | LOD99_9386                | RFX2 protein [Urocynchramus pylzowi]                                               | 306   | 81%   | 5.00E-96  | 40.84%   | NWT93764.1       |
|                  |                                                                                              | LOD99_6086                | transcription factor RFX4 [Petromyzon marinus]                                     | 402   | 52%   | 8.00E-124 | 45.65%   | XP_032805092.1   |
|                  |                                                                                              | -                         |                                                                                    |       |       |           |          |                  |
| c-Myb            | <i>Xenopus laevis</i> /AAH70808.1                                                            | -                         |                                                                                    |       |       |           |          |                  |
|                  | <i>Hydra vulgaris</i> /QFU95890.1                                                            | -                         |                                                                                    |       |       |           |          |                  |
|                  | <i>Trichoplax</i> sp. H2/RDD46708.1                                                          | -                         |                                                                                    |       |       |           |          |                  |
| CCNO             | <i>Xenopus tropicalis</i> /NP_998837.1                                                       | LOD99_13910B              | PREDICTED: G2/mitotic-specific cyclin-B3-like [Amphimedon queenslandica]           | 244   | 49%   | 3.00E-71  | 45.25%   | XP_019850667.1   |
|                  |                                                                                              | LOD99_13910A              | PREDICTED: G2/mitotic-specific cyclin-B3-like [Amphimedon queenslandica]           | 244   | 52%   | 8.00E-72  | 45.25%   | XP_019850667.1   |
|                  |                                                                                              | LOD99_11433               | G2/mitotic-specific cyclin-B-like [Anneissia japonica]                             | 296   | 90%   | 5.00E-94  | 49.12%   | XP_033121875.1   |
|                  |                                                                                              | LOD99_11524               | G2/mitotic-specific cyclin-A-like [Actinia tenebrosa]                              | 280   | 40%   | 5.00E-84  | 55.25%   | XP_031561724.1   |
|                  |                                                                                              | LOD99_2502                | G2/mitotic-specific cyclin-B3 isoform X1 [Vombatus ursinus]                        | 185   | 80%   | 1.00E-52  | 38.58%   | XP_027693373.1   |
|                  |                                                                                              | LOD99_12806               | G2/mitotic-specific cyclin-B-like isoform X1 [Actinia tenebrosa]                   | 144   | 74%   | 8.00E-36  | 34.62%   | XP_031565307.1   |
|                  |                                                                                              | LOD99_12212               | CYCB1-1 protein [Petunia x hybrida]                                                | 244   | 80%   | 5.00E-28  | 30.87%   | CAB58998.1       |
|                  |                                                                                              | LOD99_2433                | PREDICTED: cyclin-J-like [Branchiostoma belcheri]                                  | 190   | 66%   | 2.00E-54  | 39.67%   | XP_019625841.1   |
| CEP152           | <i>Xenopus laevis</i> /NP_001087086.1                                                        | -                         |                                                                                    |       |       |           |          |                  |
| CEP 192          | <i>Xenopus laevis</i> /NP_001186000.1                                                        | LOD99_3211                | centrosomal protein of 192 kDa-like isoform X2 [Actinia tenebrosa]                 | 235   | 65%   | 4.00E-58  | 23.05%   | XP_031572133.1   |
| CEP 57           | <i>Xenopus tropicalis</i> /XP_002935622.1                                                    | LOD99_3713A               | PREDICTED: centrosomal protein of 57 kDa-like isoform X16 [Branchiostoma belcheri] | 147   | 83%   | 2.00E-34  | 27.54%   | XP_019629318.1   |
|                  |                                                                                              | LOD99_3713B               | PREDICTED: centrosomal protein of 57 kDa-like isoform X16 [Branchiostoma belcheri] | 137   | 83%   | 9.00E-31  | 26.65%   | XP_019629318.1   |
| CEP 57/1         | <i>Xenopus laevis</i> /NP_001089236.1                                                        | -                         |                                                                                    |       |       |           |          |                  |
| PLK4             | <i>Xenopus laevis</i> /NP_001083146.1                                                        | LOD99_2334                | serine/threonine protein kinase [Culex quinquefasciatus]                           | 308   | 100%  | 3.00E-92  | 36.55%   | XP_001845832.1   |
|                  |                                                                                              | -                         | PREDICTED: serine/threonine-protein kinase PLK4 [Neodiprion lecontei]              | 306   | 99%   | 2.00E-91  | 35.44%   | XP_015521281.1   |
|                  |                                                                                              | -                         | serine/threonine-protein kinase PLK4 isoform X1 [Nematostella vectensis]           | 308   | 63%   | 9.00E-91  | 44.76%   | XP_001626807.1   |
|                  |                                                                                              | -                         | Chain A, Serine/threonine-protein kinase PLK4 [Homo sapiens]                       | 286   | 50%   | 1.00E-89  | 50.37%   | 3COK_A           |
| SAS6             | <i>Xenopus tropicalis</i> /XP_012819859.2                                                    | LOD99_1925                | Chain A, Serine/threonine-protein kinase PLK4 [Homo sapiens]                       | 286   | 50%   | 1.00E-89  | 50.37%   | 3COK_A           |
| STIL             | <i>Xenopus laevis</i> /NP_001084821.1                                                        | LOD99_9458                | SCL-interrupting locus protein-like [Orbicella faveolata]                          | 179   | 42%   | 2.00E-43  | 32.00%   | XP_020624688.1   |
| CENPJ            | <i>Xenopus tropicalis</i> /XP_031753135.1                                                    | LOD99_7234                | centromere protein J-like isoform X2 [Lingula anatina]                             | 206   | 55%   | 2.00E-51  | 29.77%   | XP_013399795.1   |

- no reliable hit found (e-value>1.10<sup>-2</sup>)  
retrieved in *O. minuta* genome with good support  
presence of members of the same family

**Table S11: Blast Search of core genes involved in three main ancestral signalling pathways.** A blastP search against the predicted proteome of *Oopsacas* was performed followed by a reciprocal best hit approach against NCBI NR database for blast hits with e-values <10<sup>-2</sup>. Genes absent in the transcriptome of *Oopsacas* (Schenkelaars et al., 2017) are also absent in the genome. (Domain predictions supporting the annotation are available in Schenkelaars et al., 2017)

| Query            |                                                     | Blast P against oopsacas proteome              | reverse blast-p result against NR, best hit providing an annotated protein |                                             |       |         |           |                   |                   |
|------------------|-----------------------------------------------------|------------------------------------------------|----------------------------------------------------------------------------|---------------------------------------------|-------|---------|-----------|-------------------|-------------------|
| searched protein | query sequence (species/accession number)           | <i>O. minuta</i> locus tag                     | description                                                                | score                                       | cover | e-value | identity  | accession number  |                   |
| Wnt pathway      | APC                                                 | <i>Oopsacas minuta</i> / APZ80421.1 (NCBI)     | LOD99_7009                                                                 | <i>Oopsacas minuta</i> APC                  | 1707  | 100%    | 0.0       | 100.00%           | APZ80421.1 (NCBI) |
|                  | Axin                                                | <i>Oopsacas minuta</i> / KX905244.1 (NCBI)     | LOD99_7340                                                                 | <i>Oopsacas minuta</i> Axin                 | 1311  | 100%    | 0.0       | 99.53%            | APZ81092.1 (NCBI) |
|                  | β-catenin                                           | <i>Oopsacas minuta</i> / KU316199.1 (NCBI)     | LOD99_2816                                                                 | <i>Oopsacas minuta</i> beta-catenin         | 1787  | 100%    | 0.0       | 100.00%           | APZ80422.1 (NCBI) |
|                  | CK1                                                 | <i>Mus musculus</i> / Q8BK63 (Uniprot)         | LOD99_3585                                                                 | <i>Oncorhynchus kisutch</i> casein kinase I | 624   | 86%     | 0.0       | 90.18%            | XM_031789862.1    |
|                  | Dvl                                                 | <i>Mus musculus</i> / P51141 (Uniprot)         | -                                                                          |                                             |       |         |           |                   |                   |
|                  |                                                     | <i>Amphimedon queenslandica</i> / ADO16582.1   | -                                                                          |                                             |       |         |           |                   |                   |
|                  |                                                     | <i>Oscarella lobularis</i> / KT898949.1 (NCBI) | -                                                                          |                                             |       |         |           |                   |                   |
|                  | FzdB                                                | <i>Oopsacas minuta</i> / KM365035.1 (NCBI)     | LOD99_13467                                                                | <i>Oopsacas minuta</i> Frizzled B           | 1120  | 95%     | 0.0       | 100.00%           | AJE25510.1 (NCBI) |
|                  | GSK3                                                | <i>Oopsacas minuta</i> / KU316201.1 (NCBI)     | LOD99_2576                                                                 | <i>Oopsacas minuta</i> Gsk3                 | 890   | 100%    | 0.0       | 100.00%           | APZ80424.1 (NCBI) |
|                  | Gro                                                 | <i>Oopsacas minuta</i> / KU316200.1 (NCBI)     | LOD99_13544                                                                | <i>Oopsacas minuta</i> Gro                  | 1486  | 100%    | 0.0       | 100.00%           | APZ80423.1 (NCBI) |
|                  | LRP                                                 | <i>Oopsacas minuta</i> / KU316202.1 (NCBI)     | LOD99_15634                                                                | <i>Oopsacas minuta</i> LRP                  | 3394  | 100%    | 0.0       | 100.00%           | APZ80425.1 (NCBI) |
|                  | Porc                                                | <i>Oopsacas minuta</i> / KU316203.1 (NCBI)     | LOD99_12796                                                                | <i>Oopsacas minuta</i> Porc                 | 880   | 100%    | 0.0       | 100.00%           | APZ80426.1 (NCBI) |
|                  | TCF                                                 | <i>Oopsacas minuta</i> / KU316204.1 (NCBI)     | LOD99_8961                                                                 | <i>Oopsacas minuta</i> TCF                  | 1015  | 100%    | 0.0       | 100.00%           | APZ80427.1 (NCBI) |
|                  | Wls                                                 | <i>Mus musculus</i> / Q6D1D7 (Uniprot)         | -                                                                          |                                             |       |         |           |                   |                   |
|                  |                                                     | <i>Oscarella lobularis</i> / (personal data)   | -                                                                          |                                             |       |         |           |                   |                   |
|                  |                                                     | <i>Mus musculus</i> / P04426 (Uniprot)         | -                                                                          |                                             |       |         |           |                   |                   |
| Wnt              | <i>Amphimedon queenslandica</i> / ABX90060.1 (NCBI) | -                                              |                                                                            |                                             |       |         |           |                   |                   |
|                  | <i>Oscarella lobularis</i> / GQ144646.1 (NCBI)      | -                                              |                                                                            |                                             |       |         |           |                   |                   |
| Notch pathway    | ADAM10                                              | <i>Oopsacas minuta</i> / MF589734 (NCBI)       | LOD99_118                                                                  | <i>Oopsacas minuta</i> Adam 10              | 1355  | 96%     | 0.0       | 100.00%           | ATY70071.1 (NCBI) |
|                  | ADAM17                                              | <i>Oopsacas minuta</i> / MF589735 (NCBI)       | LOD99_13145                                                                | <i>Oopsacas minuta</i> Adam17               | 1686  | 100%    | 0.0       | 99.51%            | ATY70072.1 (NCBI) |
|                  | APH1                                                | <i>Oopsacas minuta</i> / MF589739 (NCBI)       | LOD99_3257                                                                 | <i>Oopsacas minuta</i> APH1                 | 488   | 100%    | 1.00E-173 | 100.00%           | ATY70076.1 (NCBI) |
|                  | Delta                                               | <i>Oopsacas minuta</i> / KX932092 (NCBI)       | LOD99_19                                                                   | <i>Oopsacas minuta</i> Delta                | 2072  | 100%    | 0.0       | 100.00%           | APZ81095.1 (NCBI) |
|                  | FurinL                                              | <i>Oopsacas minuta</i> / MF589732 (NCBI)       | LOD99_4168                                                                 | <i>Oopsacas minuta</i> FurinL               | 1969  | 100%    | 0.0       | 100.00%           | ATY70069.1 (NCBI) |
|                  | MamL                                                | <i>Mus musculus</i> / Q92585 (Uniprot)         | -                                                                          |                                             |       |         |           |                   |                   |
|                  | NCoRL                                               | <i>Oopsacas minuta</i> / MF589741 (NCBI)       | LOD99_6013                                                                 | <i>Oopsacas minuta</i> NCoRL                | 1217  | 94%     | 0.0       | 97.24%            | ATY70078.1 (NCBI) |
|                  | NCSTN                                               | <i>Oopsacas minuta</i> / MF589736 (NCBI)       | LOD99_14978                                                                | <i>Oopsacas minuta</i> NCSTN                | 1348  | 100%    | 0.0       | 99.39%            | ATY70073.1 (NCBI) |
|                  | Notch                                               | <i>Oopsacas minuta</i> / MF589733 (NCBI)       | LOD99_2688                                                                 | <i>Oopsacas minuta</i> Notch                | 3626  | 97%     | 0.0       | 92.32%            | APZ81096.1 (NCBI) |
|                  | PEN2                                                | <i>Oopsacas minuta</i> / MF589738 (NCBI)       | LOD99_7221                                                                 | <i>Oopsacas minuta</i> Pen2                 | 206   | 100%    | 7.00E-67  | 100.00%           | ATY70075.1 (NCBI) |
| PSEN2            | <i>Oopsacas minuta</i> / MF589737 (NCBI)            | LOD99_11660                                    | <i>Oopsacas minuta</i> Psen                                                | 885                                         | 100%  | 0.0     | 100.00%   | ATY70074.1 (NCBI) |                   |
| SuH              | <i>Oopsacas minuta</i> / MF589740 (NCBI)            | LOD99_6806                                     | <i>Oopsacas minuta</i> SuH                                                 | 984                                         | 73%   | 0.0     | 95.07%    | ATY70077.1 (NCBI) |                   |
| TGF pathway      | ACVRI                                               | <i>Oopsacas minuta</i> / MF589727 (NCBI)       | LOD99_12520                                                                | <i>Oopsacas minuta</i> ACVRI                | 793   | 73%     | 0.0       | 99.74%            | ATY70064.1 (NCBI) |
|                  | ACVRII                                              | <i>Oopsacas minuta</i> / MF589725 (NCBI)       | LOD99_13135                                                                | <i>Oopsacas minuta</i> ACVRII               | 1264  | 95%     | 0.0       | 96.26%            | ATY70062.1 (NCBI) |
|                  | BMPLa                                               | <i>Oopsacas minuta</i> / MF589722 (NCBI)       | LOD99_11279                                                                | <i>Oopsacas minuta</i> BMPLa                | 702   | 100%    | 0.0       | 99.71%            | ATY70059.1 (NCBI) |
|                  | BMPLb                                               | <i>Oopsacas minuta</i> / MF589723 (NCBI)       | LOD99_4658                                                                 | <i>Oopsacas minuta</i> BMPLb                | 893   | 100%    | 0.0       | 99.77%            | ATY70060.1 (NCBI) |
|                  | BMPLc                                               | <i>Oopsacas minuta</i> / MF589724 (NCBI)       | LOD99_13456                                                                | <i>Oopsacas minuta</i> BMPLc                | 694   | 86%     | 0.0       | 100.00%           | ATY70061.1 (NCBI) |
|                  | SARA                                                | <i>Mus musculus</i> / A8Y5G5 (Uniprot)         | -                                                                          |                                             |       |         |           |                   |                   |
|                  | Ski/Sn                                              | <i>Mus musculus</i> / A7M7C7 (Uniprot)         | -                                                                          |                                             |       |         |           |                   |                   |
|                  | Smad1/5                                             | <i>Oopsacas minuta</i> / MF589729 (NCBI)       | LOD99_4111                                                                 | <i>Oopsacas minuta</i> Smad1/5              | 788   | 81%     | 0.0       | 100.00%           | ATY70066.1 (NCBI) |
|                  | Smad2/3                                             | <i>Oopsacas minuta</i> / MF589730 (NCBI)       | LOD99_13626                                                                | <i>Oopsacas minuta</i> Smad2/3              | 969   | 100%    | 0.0       | 98.11%            | ATY70067.1 (NCBI) |
|                  | Smad4                                               | <i>Oopsacas minuta</i> / MF589731 (NCBI)       | LOD99_15194                                                                | <i>Oopsacas minuta</i> Smad 4               | 1189  | 98%     | 0.0       | 99.83%            | ATY70068.1 (NCBI) |
|                  | Smad6/7                                             | <i>Mus musculus</i> / O35182 (Uniprot)         | -                                                                          |                                             |       |         |           |                   |                   |
|                  | SMURF                                               | <i>Mus musculus</i> / Q9CUN6 (Uniprot)         | -                                                                          |                                             |       |         |           |                   |                   |
|                  | TGFβLa                                              | <i>Oopsacas minuta</i> / MF589721 (NCBI)       | LOD99_185                                                                  | <i>Oopsacas minuta</i> TGFbetaLa            | 791   | 100%    | 0.0       | 99.48%            | ATY70058.1 (NCBI) |
|                  | TGFβRIa                                             | <i>Oopsacas minuta</i> / KX932095.1 (NCBI)     | LOD99_14512                                                                | <i>Oopsacas minuta</i> TGFbetaRIa           | 1071  | 99%     | 0.0       | 100.00%           | APZ81098.1 (NCBI) |
| TGFβRIb          | <i>Oopsacas minuta</i> / MF589728 (NCBI)            | LOD99_731                                      | <i>Oopsacas minuta</i> TGFbetaRIb                                          | 1006                                        | 91%   | 0.0     | 100.00%   | ATY70065.1 (NCBI) |                   |
| TGFβRII          | <i>Oopsacas minuta</i> / MF589726 (NCBI)            | LOD99_636                                      | <i>Oopsacas minuta</i> TGFbetaTII                                          | 1267                                        | 100%  | 0.0     | 97.33%    | ATY70063.1 (NCBI) |                   |

- no reliable hit found  
 retrieved in *O. minuta* genome with good support  
 presence of members of the same family

**Table S12: Blastp search results concerning G-proteins** (against the predicted proteome of *Oopsacas minuta*; locus tags provided only if e-value<10-2) and reverse best blast hits (against NCBI NR database).

| P Blast against <i>Oopsacas</i> predicted proteome |                                           |                                        | reverse blast-p result against NR, best hit providing an annotated protein                           |                                                                                                                                                                                                                                                  |                   |                   |                                    |                            |                                                    |
|----------------------------------------------------|-------------------------------------------|----------------------------------------|------------------------------------------------------------------------------------------------------|--------------------------------------------------------------------------------------------------------------------------------------------------------------------------------------------------------------------------------------------------|-------------------|-------------------|------------------------------------|----------------------------|----------------------------------------------------|
| searched protein                                   | query sequence (species/accession number) | <i>O.minuta</i> genome reference       | description                                                                                          | score                                                                                                                                                                                                                                            | cover             | e-value           | identity                           | accession number           |                                                    |
| G-proteins                                         | <b>GNA12</b>                              | <i>Mus musculus</i> / P27600 (Uniprot) | LOD99_15437 (GNA12/13)                                                                               | guanine nucleotide-binding protein G(13) subunit alpha [Amphimedon queenslandica]                                                                                                                                                                | 411               | 97%               | 1.00E-137                          | 55.24%                     | XM_011404685.2                                     |
|                                                    | <b>GNAI</b>                               | <i>Mus musculus</i> / B2RSH2 (Uniprot) | LOD99_15292 (GNAI-a)<br>LOD99_2939 (GNAI-b)                                                          | guanine nucleotide-binding protein G(o) subunit alpha [Acanthopleura granulata]<br>guanine nucleotide-binding protein G(i) subunit alpha [Acanthopleura granulata]                                                                               | 426<br>414        | 97%<br>99%        | 2.00E-145<br>6.00E-141             | 56.62%<br>56.34%           | MN587143.1<br>MN587142.1                           |
|                                                    | <b>GNAQ</b>                               | <i>Mus musculus</i> / P50148 (Uniprot) | LOD99_360 / LOD99_361 / LOD99_85 (GNAQ-a)<br>LOD99_9371 / LOD99_9369 (GNAQ-b)<br>LOD99_1676 (GNAQ-c) | guanine nucleotide-binding protein G(q) subunit alpha [Amphimedon queenslandica]<br>guanine nucleotide-binding protein G(q) subunit alpha [Doryteuthis pealeii]<br>guanine nucleotide-binding protein G(q) subunit alpha [Oryctolagus cuniculus] | 311<br>311<br>271 | 98%<br>96%<br>98% | 1.00E-99<br>3.00E-100<br>2.00E-84  | 43.38%<br>46.07%<br>38.71% | XM_003382741.3<br>KR107042.1<br>NM_001082715.1     |
|                                                    | <b>GNAS</b>                               | <i>Mus musculus</i> / P63094 (Uniprot) | LOD99_716 (GNAS)                                                                                     | guanine nucleotide-binding protein G subunit alpha [Chaetura pelagica]                                                                                                                                                                           | 360               | 98%               | 3.00E-118                          | 48.11%                     | XM_010006874.1                                     |
|                                                    | <b>GNAV</b>                               | <i>Mus musculus</i> / B0V3V7 (Uniprot) | LOD99_15202 / LOD99_15197 (GNAV)                                                                     | guanine nucleotide-binding protein G(o) subunit alpha [Geodia cydonium]                                                                                                                                                                          | 435               | 96%               | 4.00E-147                          | 59.55%                     | Y14247.1                                           |
|                                                    | <b>GNB</b>                                | <i>Mus musculus</i> / P62873 (Uniprot) | LOD99_9728 (GNB1/4-a)<br>LOD99_4665 (GNB1/4-b)<br>LOD99_2821 (GNB5)                                  | guanine nucleotide-binding protein G subunit beta [Loa loa]<br>guanine nucleotide-binding protein G subunit beta [Tsuchiyaeta wingfieldii]<br>guanine nucleotide-binding protein G(5) subunit beta [Saccoglossus kowalevskii]                    | 484<br>315<br>293 | 98%<br>93%<br>76% | 2.00E-166<br>4.00E-102<br>2.00E-92 | 63.87%<br>46.76%<br>47.57% | XM_020450860.1<br>XM_019174048.1<br>XM_002740478.2 |
|                                                    | <b>GNG</b>                                | <i>Mus musculus</i> / Q61012 (Uniprot) | LOD99_13691b (GBG-a)<br>LOD99_14385 (GBG-b)                                                          | guanine nucleotide-binding protein G(T2) gamma [Pteropus vampyrus]<br>guanine nucleotide-binding protein G(14) gamma [Terrapene carolina]                                                                                                        | 50.1<br>48.1      | 90%<br>93%        | 5.00E-06<br>3.00E-05               | 42.37%<br>49.18%           | XM_023524652.1<br>XM_024219802.1                   |

- no reliable hit found  
retrieved in *O. minuta* genome with good support  
presence of members of the same family

**Table S13: Blastp search and protein domain analyses concerning basic Helix Loop Helix (bHLH) transcription factors**

BlastP searches against the predicted proteome of *O.minuta* were performed using various cnidarian and bilaterian sequences and reciprocal best hit against Human and *Drosophila Refseq protein databases as described in Fortunato et al., 2016. The domain analysis was performed using NCBI CD-Search (Yang et al,2020).*

The assignment to groups or families was refined by phylogenetic analysis (Fig. S8 and S9)

| Identification | Family  | Superfamily    | High-order group | Domain(s)                                          |
|----------------|---------|----------------|------------------|----------------------------------------------------|
| LOD99_13791    | -       | Atonal-related | <b>A</b>         | 54 - 106: bHLH                                     |
| LOD99_2605     | E12/E47 | -              | <b>B</b>         | 379 - 431: bHLH                                    |
| LOD99_14017    | E12/E47 | -              | <b>B</b>         | 236 - 288: bHLH                                    |
| LOD99_4504     | E12/E47 | -              | <b>B</b>         | 452 - 504: bHLH                                    |
| LOD99_6968     | MITF    | -              | <b>B</b>         | 304 - 355: bHLH                                    |
| LOD99_4176     | SREBP   | -              | <b>B</b>         | 246 - 295: bHLH                                    |
| LOD99_1394     | AP4     | -              | <b>B</b>         | 315 - 366: bHLH                                    |
| LOD99_13764    | -       | ARNT + BMAL    | <b>C</b>         | 59 - 114: bHLH<br>300 - 349: PAS<br>99 - 152: bHLH |
| LOD99_4226     | -       | ARNT + BMAL    | <b>C</b>         |                                                    |
| LOD99_4302     | Clock   |                | <b>C</b>         | 21 - 77: bHLH<br>237 - 291: PAS                    |

Approximate Bayes  
branch support

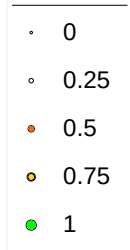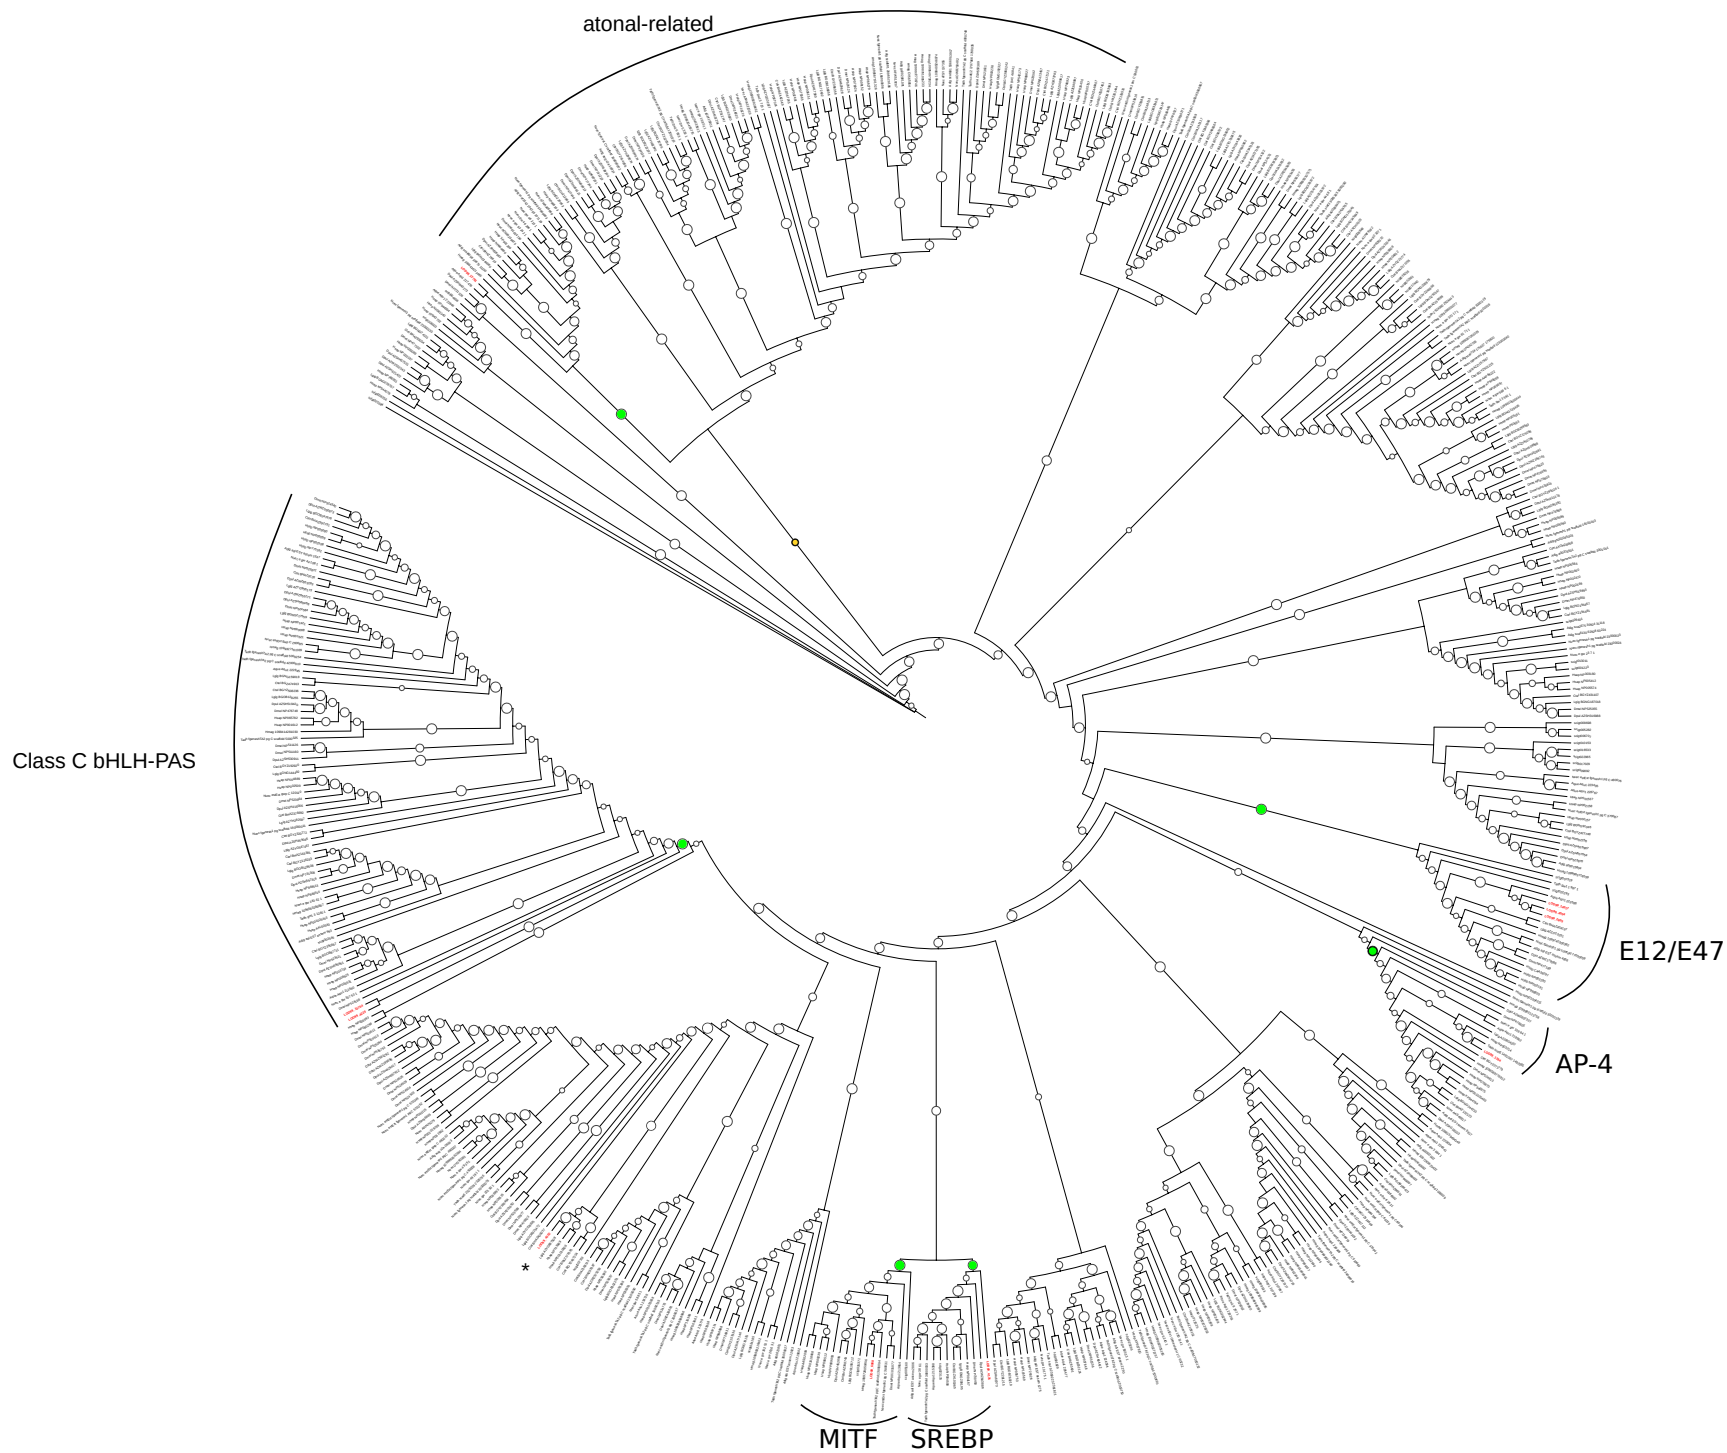

**Figure S8: Phylogenetic relationships among bHLH transcription factors.** Sequences from *O. minuta* are in bold red. The analysis was performed using PhyML (Guidon et al., 2010) with LG model as described in Fortunato et al. 2016, and the branch support estimated by an approximate bayes test (using the custom workflow provided at <https://ngphylogeny.fr> (Lemoine et al., 2019)). The alignment of bHLH domain is available at [https://zenodo.org/communities/oops\\_13](https://zenodo.org/communities/oops_13). The obvious misplacement of LOD99\_4302\* in the Hes/Hey family was resolved thanks to a second phylogenetic analysis (Additional file 3: Fig. S9).



Approximate Bayes  
branch support

- 0.37
- 0.52
- 0.68
- 0.84
- 1

Tree scale: 1

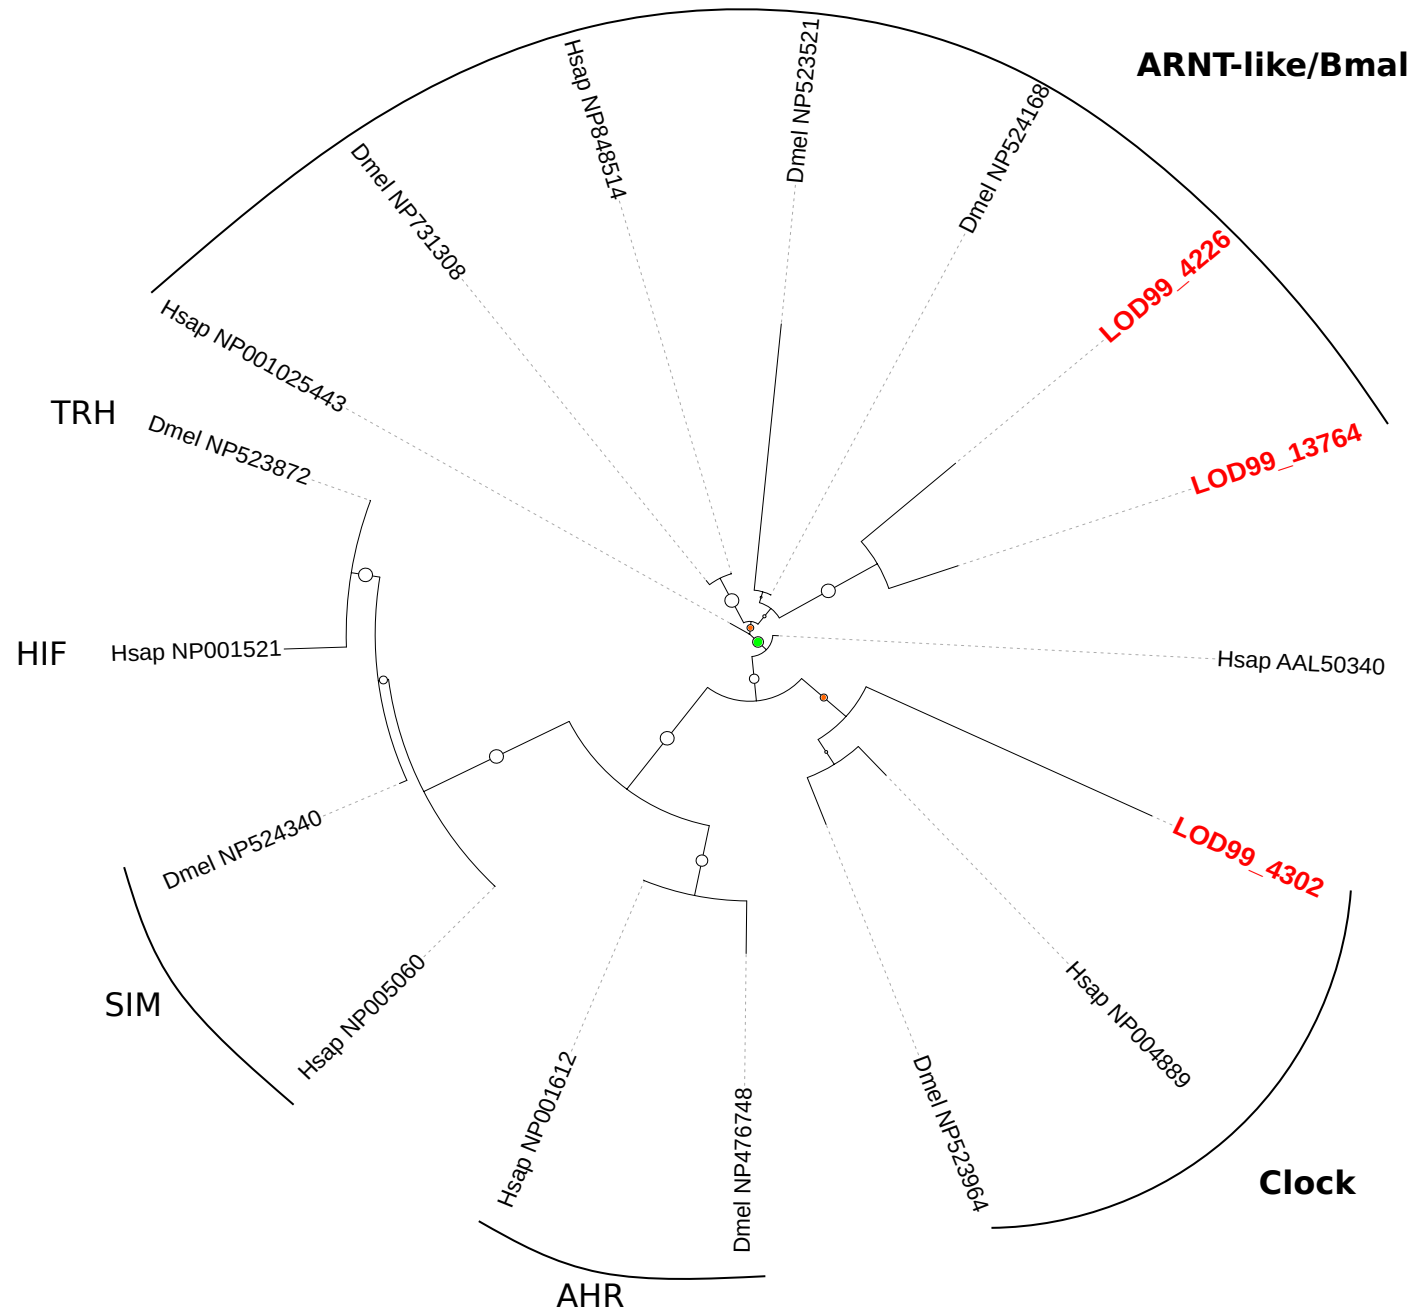

**Figure S9: Phylogenetic position of *O. minuta* bHLH-PAS transcription factors.**

The same method as described in Fig. S8 was used, using a set of sequences limited to bHLH-PAS sequences from *Drosophila melanogaster* (Dmel) and *Homo sapiens* (Hsap).

**Table S14: Blastp search, domain and phylogenetic analyses performed on various transcription factor types with a particular focus on HD transcription factors**

The BlastP search against the predicted proteome of *O. minuta* was performed using several queries from different non-bilaterian species: the ctenidarian *Nematostella vectensis* (AAG37787.1; AAG39349.1; AF11248.1; AAO27886.2), from the placozoon *Trichoplax adhaerens* (AAC05783.1) and from the sponges *Sycon raphanus* and *S. ciliatum* (AAG28516.1; AAG28515.1; AAG28514.1; AAG28509.1; AAG28513.1; AAG28512.1; AAG28511.1; AAG28510.1; CEF71798.1; CEF71797.1; CEF71796.1; CEF71794.1; CEF71792.1; CEF71799.1; CEF71795.1; CEF71793.1) and *Amphimedon queenslandica* (XP\_019851214.1; XP\_011408876.1; XP\_011409937.1; XP\_011408017.1; XP\_003387700.1; XP\_003386306.1; XP\_003383252.1; XP\_019864339.1; XP\_003387395.1; XP\_019849423.1; XP\_019849421.1; XP\_011410538.1; XP\_003384683.1; XP\_019851578.1; XP\_019849051.1; XP\_019864471.1; XP\_019863496.1; XP\_011404713.1; XP\_011410028.1; XP\_003386365.1; NP\_001292180.1; NP\_001295556.1; NP\_001292184.1; XP\_011410308.1; XP\_019858268.1; ACC76763.1; XP\_011403814.2; XP\_011410489.1; XP\_011409566.1; XP\_003389232.1; XP\_003387530.1). Only the focus tags of *Oopscas* sequences that gave reliable results (local Blast P e-values <10<sup>-2</sup> + congruent reciprocal best hit against NR + domain predictor) are indicated here after. The protein domain prediction and phylogenetic analyses are available in Fig. S10 and S11.

| DBD type | Locus tag in <i>O.minuta</i> |                                                                                                      | reciprocal best hit result | score |           |         | identity       | accession number | domain analysis (Fig.S10)                                                          | phylogeny (Fig.S11)                           | chosen annotation |
|----------|------------------------------|------------------------------------------------------------------------------------------------------|----------------------------|-------|-----------|---------|----------------|------------------|------------------------------------------------------------------------------------|-----------------------------------------------|-------------------|
|          | description                  | description                                                                                          |                            | score | cover     | e-value |                |                  |                                                                                    |                                               |                   |
| HD       | LOD99_6815                   | homeobox-containing protein [Ephydatia fluviatilis]                                                  | 110                        | 30%   | 4.00E-27  | 69.44%  | AAA20149.1     | HD               | probable divergent NKX (long branch) HD containing transcription factor ANTP class |                                               |                   |
|          | LOD99_3608                   | homeobox-containing protein [Ephydatia fluviatilis]                                                  | 141                        | 22%   | 2.00E-37  | 83.54%  | AAA20151.1     | HD               | Msx                                                                                | Msx                                           |                   |
|          | LOD99_1044                   | BarX/Bsh [Halichondria bowerbanki]                                                                   | 98.2                       | 24%   | 1.00E-20  | 70.15%  | AAQ24371.1     | HD               | Barx                                                                               | BarH_Like                                     |                   |
|          | LOD99_1602                   | homeobox protein DLX-3-like [Crassostrea virginica]                                                  | 77.0                       | 19%   | 2.00E-12  | 47.95%  | XP_022296381.1 | HD               | probable divergent NKX                                                             | HD containing transcription factor            |                   |
|          | LOD99_7225                   | brain-specific homeobox Bsh [Mnemiopsis leidyi]                                                      | 84.3                       | 37%   | 1.00E-16  | 60.00%  | ACD85817.1     | HD               | Barx                                                                               | BarH_Like                                     |                   |
|          | LOD99_11824                  | paired-like homeodomain protein [Cytia hemisphaerica]                                                | 123                        | 32%   | 2.00E-29  | 59.41%  | ALY05312.1     | HD               |                                                                                    | Arx 1                                         |                   |
|          | LOD99_4409                   | aristales-related homeobox protein-like [Stylophora pistillata]                                      | 134                        | 60%   | 2.00E-34  | 54.11%  | XP_022796171.1 | HD               |                                                                                    | Arx 2                                         |                   |
|          | LOD99_13863                  | LIM/homeobox protein Lhx3-like isoform X3 [Mizuhopecten yessoensis]                                  | 270                        | 70%   | 2.00E-84  | 47.93%  | XP_021340799.1 | HD + 2 LIM       |                                                                                    | Lhx                                           |                   |
|          | LOD99_1585                   | PREDICTED: insulin gene enhancer protein ISL-2 isoform X2 [Callorhynchus milii]                      | 201                        | 82%   | 2.00E-58  | 41.43%  | XP_007906411.1 | HD + 2 LIM       |                                                                                    | Isl                                           |                   |
|          | LOD99_2513                   | PREDICTED: POU domain protein 2-like [Octopus bimaculoides]                                          | 72.8                       | 9%    | 1.00E-09  | 52.54%  | XP_014784998.1 | HD + POU         |                                                                                    | Pou1                                          |                   |
|          | LOD99_6803                   | ventral veins lacking protein [Monochamus alternatus]                                                | 202                        | 48%   | 2.00E-57  | 52.06%  | AQV56479.1     | HD + POU         |                                                                                    | Pou2                                          |                   |
|          | LOD99_16229                  | PREDICTED: pituitary-specific positive transcription factor 1-like [Branchiostoma belcheri]          | 247                        | 58%   | 4.00E-77  | 69.64%  | XP_019639300.1 | HD + POU         |                                                                                    | Pou3                                          |                   |
|          | LOD99_13601                  | PREDICTED: hepatocyte nuclear factor 1-alpha-A-like isoform X2 [Amphimedon queenslandica]            | 171                        | 35%   | 1.00E-43  | 49.43%  | XP_019859393.1 | HD + HNF-1       |                                                                                    | Hnf-1                                         |                   |
|          | LOD99_15015                  | homeobox protein sixA-like isoform X3 [Pomacea canaliculata]                                         | 340                        | 57%   | 4.00E-112 | 64.80%  | XP_025105983.1 | HD + SIX         |                                                                                    | Six                                           |                   |
|          | LOD99_14985                  | prep homeobox protein [Phalusia mammillata]                                                          | 147                        | 54%   | 4.00E-35  | 33.13%  | CAR3265147.1   | HD+KN+MeisPKnox  |                                                                                    | Meis                                          |                   |
|          | LOD99_14669                  | PREDICTED: pre-B-cell leukemia transcription factor 1-like isoform X3 [Sinycoclocheilus anshuiensis] | 153                        | 68%   | 2.00E-40  | 37.79%  | XP_016344714.1 | HD + PBC         |                                                                                    | Pbx 1                                         |                   |
|          | LOD99_1385                   | Pbx [Oikopleura dioica]                                                                              | 162                        | 64%   | 1.00E-44  | 39.61%  | AAW23083.1     | HD + PBC         |                                                                                    | Pbx 2                                         |                   |
|          | LOD99_13406                  | PREDICTED: homeobox protein TGIF2-like [Hyalella azteca]                                             | 67.4                       | 29%   | 6.00E-11  | 48.21%  | XP_018015131.1 | HD + KN          |                                                                                    | Tgif                                          |                   |
|          | LOD99_15245                  | PREDICTED: homeobox protein TGIF2-like [Hyalella azteca]                                             | 77.0                       | 23%   | 8.00E-14  | 51.61%  | XP_018010193.1 | HD + KN          |                                                                                    | HD containing transcription factor TALE class |                   |
|          | LOD99_15710                  | PREDICTED: flocculation protein FLO11-like [Amphimedon queenslandica]                                | 104                        | 23%   | 3.00E-22  | 74.58%  | XP_011403814.2 | HD + KN          |                                                                                    | Irx                                           |                   |
| PRD      | LOD99_13136A                 | Paired domain-containing protein [Caenorhabditis elegans]                                            | 182                        | 24%   | 4.00E-48  | 51.38%  | NP_501836.1    | PRD              |                                                                                    | PRD containing protein                        |                   |
|          | LOD99_13136B                 | Paired domain-containing protein [Caenorhabditis elegans]                                            | 182                        | 23%   | 3.00E-48  | 51.38%  | NP_501836.1    | PRD              |                                                                                    | PRD containing protein                        |                   |
| SOX/HMG  | LOD99_5639                   | transcription factor Sox14b [Takifugu rubripes]                                                      | 146                        | 47%   | 4.00E-39  | 54.40%  | AAQ18499.1     | HMG box          |                                                                                    | Sox                                           |                   |
|          | LOD99_6974                   | sox8 [Capitella teleta]                                                                              | 148                        | 30%   | 4.00E-39  | 71.84%  | AST23030.1     | HMG box          |                                                                                    | Sox                                           |                   |
|          | LOD99_2577                   | transcription factor Sox-14-like [Mizuhopecten yessoensis]                                           | 124                        | 27%   | 2.00E-29  | 58.33%  | XP_021356125.1 | HMG box          |                                                                                    | Sox                                           |                   |
|          | LOD99_3528                   | PREDICTED: high mobility group protein DSP1-like [Amphimedon queenslandica]                          | 281                        | 85%   | 6.00E-51  | 52.54%  | XP_019862547.1 | HMG box          |                                                                                    | HMG box containing transcription factor       |                   |
|          | LOD99_9953                   | high mobility group-T protein-like [Acanthochromis polyacanthus]                                     | 151                        | 90%   | 1.00E-42  | 43.60%  | XP_022052747.1 | HMG box          |                                                                                    | HMG box containing transcription factor       |                   |
|          | LOD99_642                    | hypothetical protein A103_02036 [Capronia epimyces CBS 606:96]                                       | 80.9                       | 25%   | 5.00E-13  | 45.33%  | XP_007730369.1 | Hmg box + bHLH   |                                                                                    | HMG box containing transcription factor       |                   |
|          | LOD99_1071                   | hypothetical protein [LUMI_23413] [gnelater luminosus]                                               | 98.2                       | 22%   | 1.00E-17  | 40.74%  | KAF2882749.1   | HMG box          |                                                                                    | HMG box containing transcription factor       |                   |
|          | LOD99_8961                   | Transcription factor [Oopscas minuta]                                                                | 1015                       | 100%  | 0.0       | 100.00% | AP220427.1     | HMG box          |                                                                                    | TCF/LEF transcription factor family           |                   |
|          | LOD99_3517                   | T-box-containing protein TBXGL-like [Octopus vulgaris]                                               | 208                        | 27%   | 1.00E-57  | 49.24%  | XP_029654306.1 | T-Box            |                                                                                    | T-Box transcription factor                    |                   |
|          | LOD99_7913                   | hypothetical protein CAPTEDRAFT_110717 [Capitella teleta]                                            | 206                        | 45%   | 5.00E-60  | 46.33%  | ELT94067.1     | T-Box            |                                                                                    | T-Box transcription factor                    |                   |
| T BOX    | LOD99_5104                   | Tbx4/5 protein [Podocoryna carnea]                                                                   | 254                        | 55%   | 2.00E-77  | 61.03%  | CAE45765.1     | T-Box            |                                                                                    | T-Box transcription factor                    |                   |
|          | LOD99_3574                   | brachyury [Oopscas minuta]                                                                           | 301                        | 32%   | 6.00E-99  | 98.60%  | AAU95753.1     | T-Box            |                                                                                    | Brachyury                                     |                   |

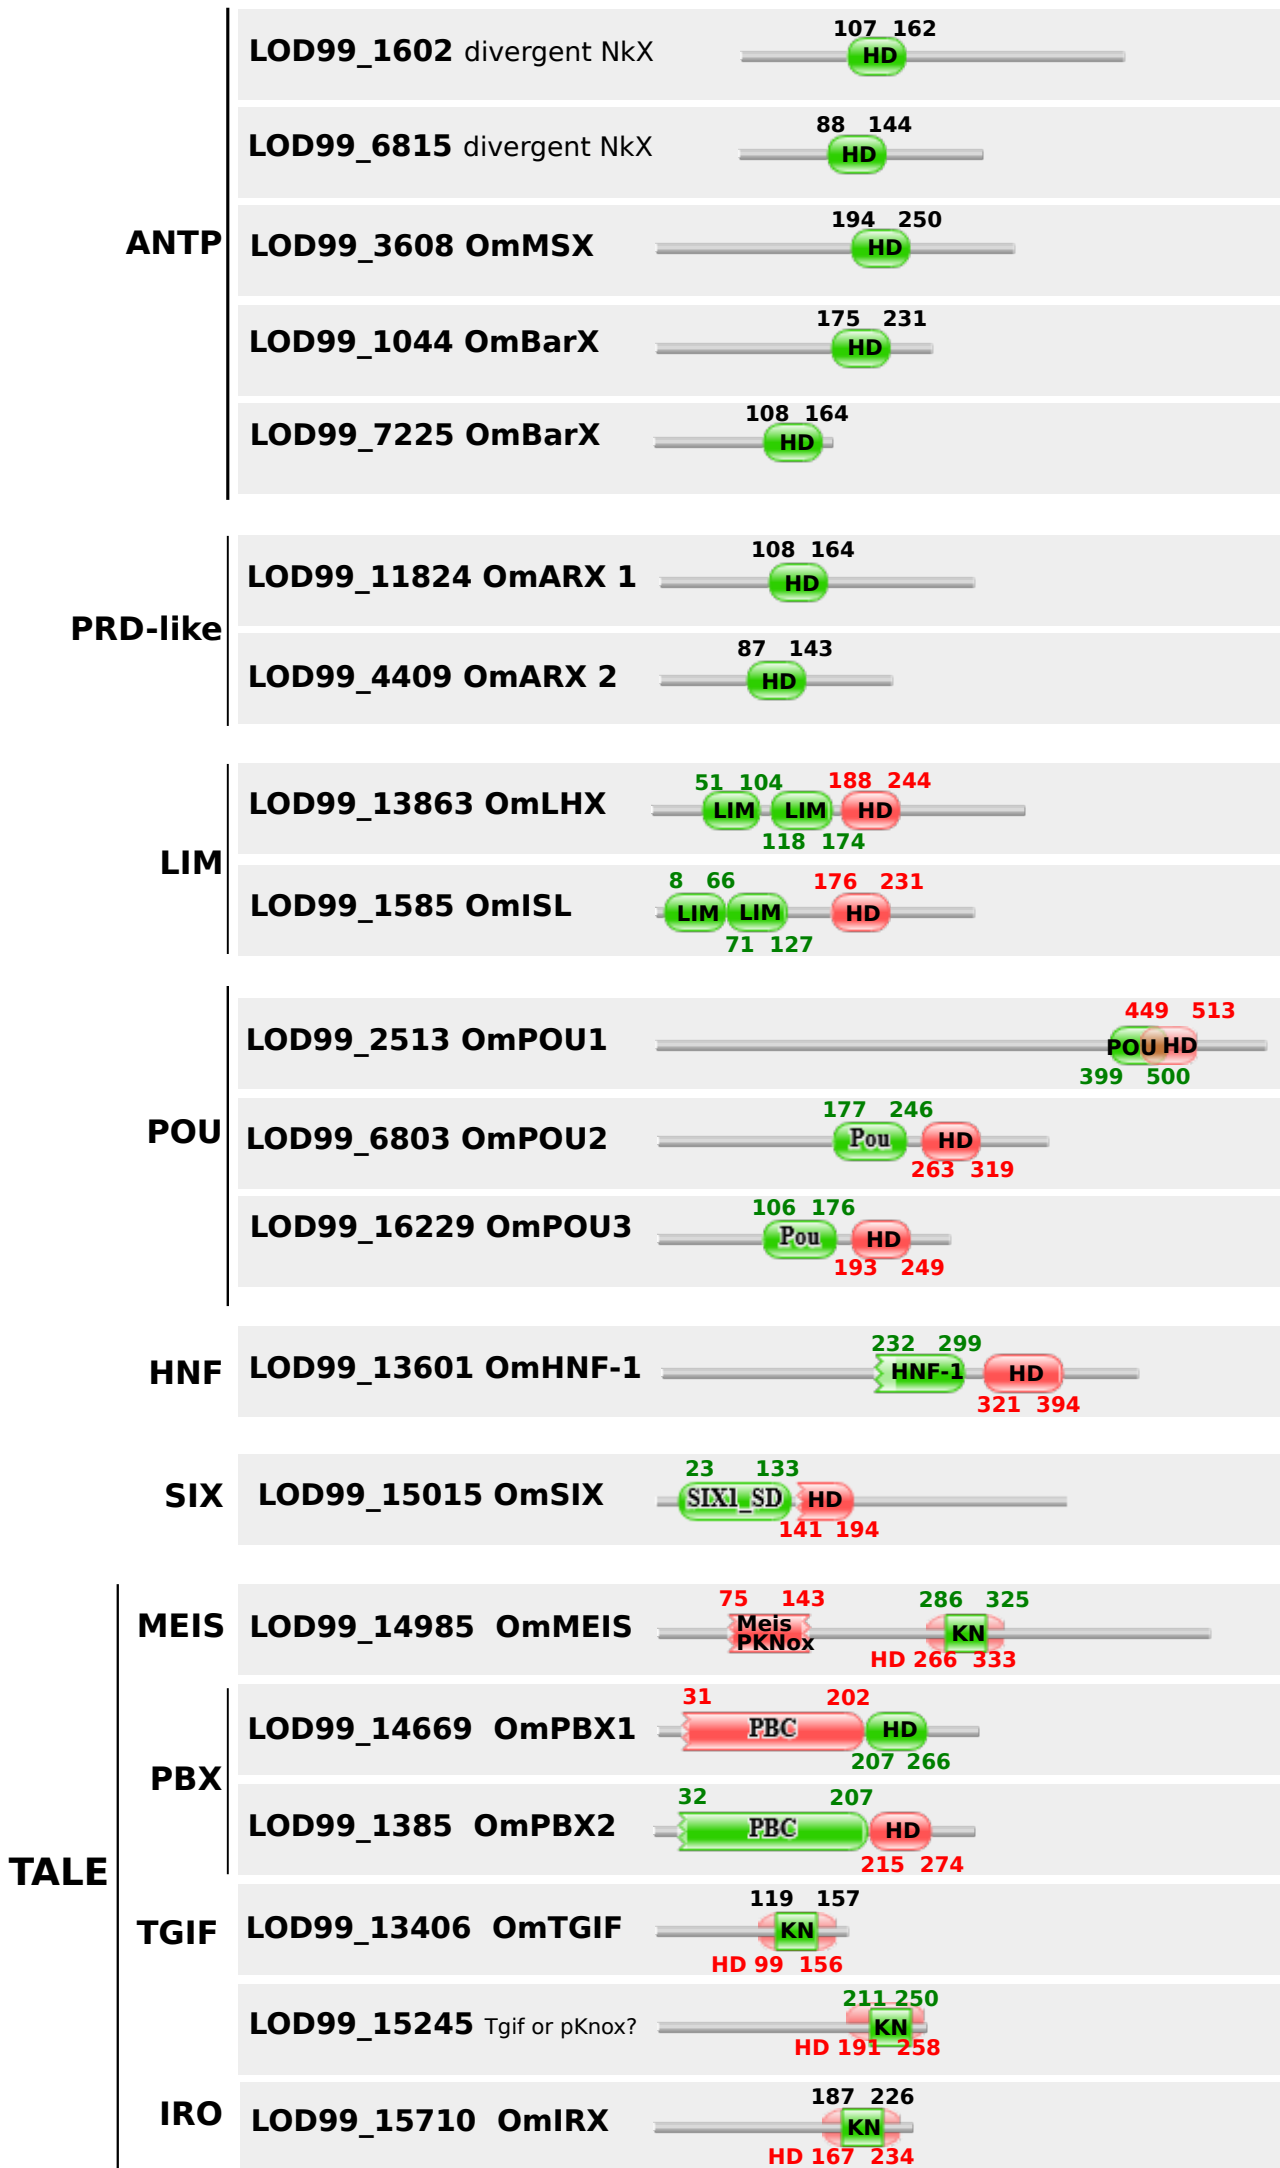

**Figure S10: Domain prediction of HD transcription factors** by Pfam (checked with InterProScan (Quevillon et al. 2005) for OmPOU1). Annotation according to Blastp hits and phylogenetic analysis: additional file 3: Fig.S11.

Approximate Bayes  
Branch support

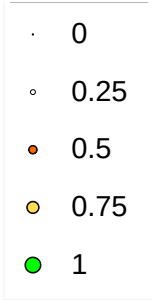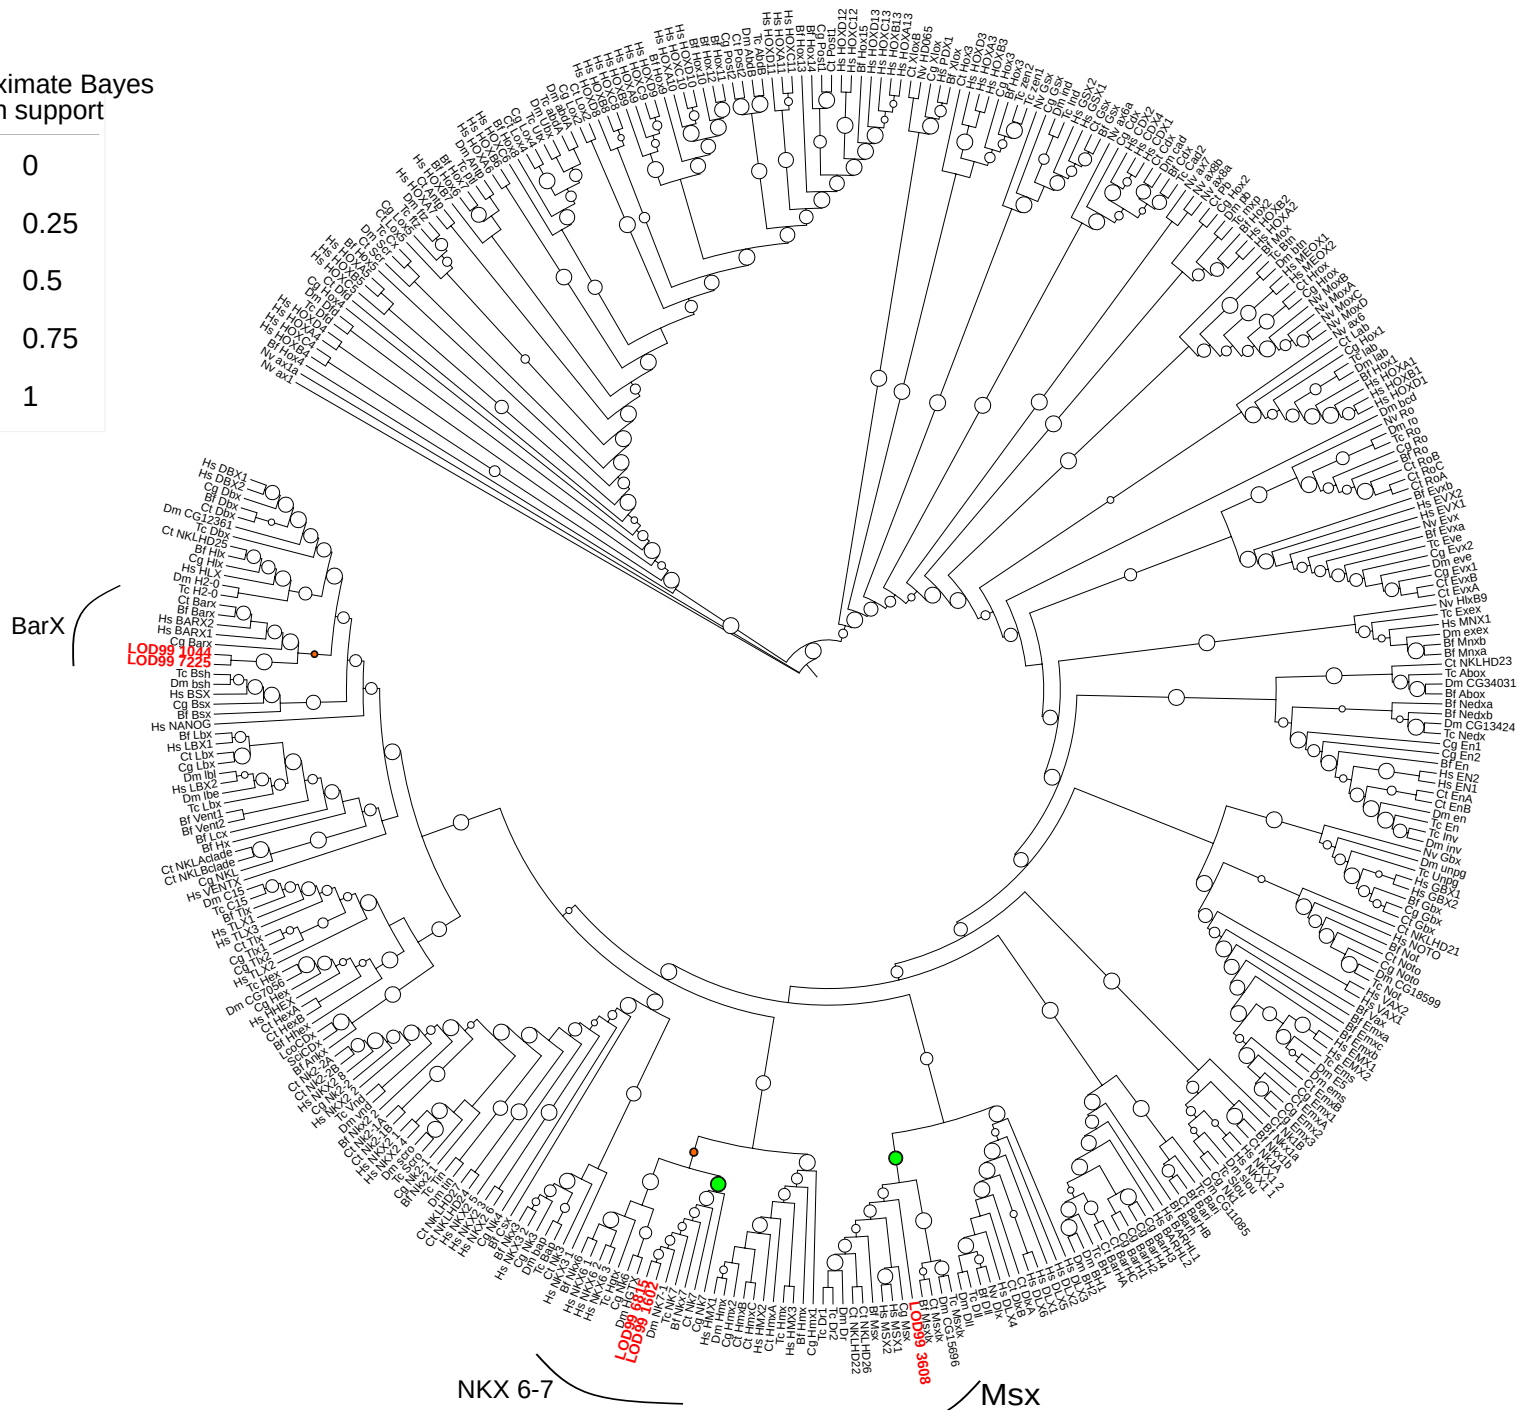

**Figure S11: Phylogenetic positions of homeobox transcription factors of *O. minuta* assigned to the Antennapedia class (in red).**

The *Opsacas* HD sequences were integrated and aligned using MUSCLE (Edgar, 2004) in the dataset used by Pastrana *et al.*, 2019, gathering sequences from *Homo sapiens* (Hs) *Capitella teleta* (Ct), *Crassostrea gigas* (Cg), *Nematostella vectensis* (Nv). The alignment is available at [https://zenodo.org/communities/oops\\_13](https://zenodo.org/communities/oops_13). The phylogenetic analysis was performed using PhyML (LG model, estimated gamma shape with 4 categories of substitution, approximate bayes branch support) at <https://ngphylogeny.fr>.



**Table S16: Blastp search for proteins involved in chemical signaling against *Oopsacas* predicted proteome and reverse blast best hits againsts the human NR database**

| Blast P against <i>O. minuta</i> proteome  |                                                                                            |                                   |                           |             | Reciprocal blast hit |                |              | Domain Prediction                                                                      |                                            |
|--------------------------------------------|--------------------------------------------------------------------------------------------|-----------------------------------|---------------------------|-------------|----------------------|----------------|--------------|----------------------------------------------------------------------------------------|--------------------------------------------|
| Searched proteins                          | Query sequence description and NCBI ID                                                     | <i>Oopsacas minuta</i> locus tags | e value                   | #hits (e<5) | Human hit rev blast  | e value        | Hum hit name | (Pfam)                                                                                 |                                            |
| <b>Monamine neurotransmitter molecules</b> |                                                                                            |                                   |                           |             |                      |                |              |                                                                                        |                                            |
| 5HT receptor                               | 5-hydroxytryptamine receptor 5B                                                            | P35365                            | LOD99_183                 | 1.10-6      | 1                    | CAG46720.1     | 1.10-10      | Dopamine receptor D1                                                                   | 7TM_GPCR_Srx                               |
| TpH                                        | tryptophan 5-hydroxylase 1 [Homo sapiens]                                                  | NP_004170.1                       | LOD99_15798               | 1.10-159    | 1                    | same as PaH    | 1.10-178     | phenylalanine-4-hydroxylase [Homo sapiens]                                             |                                            |
| AADC                                       | aromatic-L-amino-acid decarboxylase isoform 4 [Homo sapiens]                               | NP_001229817.1                    | LOD99_3607                | 1.10-21     | 1                    | NP_000809.1    | 1.10-141     | glutamate decarboxylase 2 [Homo sapiens]                                               |                                            |
| Th                                         | tyrosine hydroxylase [Mus musculus]                                                        | AAA40434.1                        | LOD99_15798               | 1.10-142    | 1                    | same as PaH    | same         |                                                                                        |                                            |
| Qdpr                                       | Quinoid dihydropteridine reductase [Mus musculus]                                          | AAH02107.1                        | LOD99_14177               | 1.10-71     | 1                    | NP_000311.2    | 1.10-78      | dihydropteridine reductase isoform 1 [Homo sapiens]                                    |                                            |
| sicl8a2                                    | solute carrier organic anion transporter family member 1A2 [Homo sapiens]                  | NP_602307.1                       | LOD99_7596                | 7.12E-79    | 5                    | NP_057438.3    | 1.10-104     | solute carrier organic anion transporter family member 4A1 [Homo sapiens]              |                                            |
| PaH                                        | phenylalanine hydroxylase [Homo sapiens]                                                   | AAC51772.1                        | LOD99_15798               | -179        | 1                    | NP_000268.1    | 1.10-178     | phenylalanine-4-hydroxylase [Homo sapiens]                                             | BiopterinH domain                          |
| Dbh                                        | dopamine-beta-hydroxylase [Mus musculus]                                                   | AAB69054.1                        | LOD99_7269                | -67         | 1                    | NP_056344.2    | 1.1074       | DBH-like monooxygenase protein 1 precursor [Homo sapiens]                              |                                            |
| Rnmt                                       | phenylethanolamine-N-methyltransferase [Mus musculus]                                      | EDL16137.1                        | LOD99_8458                | 1           | 0                    | AAH54342.1     | 1.10-83      | EIF3A protein [Homo sapiens]                                                           | PINT (proteosome initiation factor) domain |
| Dopamine receptor                          | beta-2 adrenergic receptor [Mus musculus]                                                  | NP_031446.2                       | LOD99_183                 | 1           | 1                    | CAG46720.1     | 1.10-10      | DRD1 [Homo sapiens]                                                                    | Pfam:7TM_GPCR_Srx                          |
| <b>Glutamate</b>                           |                                                                                            |                                   |                           |             |                      |                |              |                                                                                        |                                            |
| Gl5                                        | glutaminase [Homo sapiens]                                                                 | AAF21933.1                        | LOD99_13155               | 3.31E-157   | 7                    | NP_055720.3    | 1.10-155     | glutaminase kidney isoform, mitochondrial isoform 1 precursor [Homo sapiens]           |                                            |
| Glud1                                      | glutamate dehydrogenase [Homo sapiens]                                                     | AAZ0969.1                         | LOD99_15625               | 0           | 3                    | NP_005262.1    | 0            | glutamate dehydrogenase 1, mitochondrial isoform a precursor [Homo sapiens]            | ELFV_dehydrog_N domain                     |
| mGluR                                      | metabotropic glutamate receptor 1 isoform alpha precursor [Homo sapiens]                   | NP_001264993.1                    | LOD99_14769               | 5.22E-81    | 6                    | NP_870989.1    | 1.10-109     | metabotropic glutamate receptor 7 isoform b precursor [Homo sapiens]                   |                                            |
| GAD                                        | Glutamate decarboxylase GAD1 protein [Homo sapiens]                                        | AAH36552.1                        | LOD99_3607                | 1.10-68     | 2                    | NP_000809.1    | 1.10-141     | glutamate decarboxylase 2 [Homo sapiens]                                               |                                            |
| EAAT                                       | glutamate transporter [Mus musculus]                                                       | AAK01708.1                        | LOD99_3448                | 1.10-116    | 1                    | NP_005062.1    | 1.10-120     | excitatory amino acid transporter 4 isoform 2 [Homo sapiens]                           |                                            |
| VGlut1                                     | Brain-specific Na(+)-dependent inorganic phosphate cotransporter [Mouse]                   | Q3TXX4.2                          | LOD99_6988                | 9.48E-33    | 4                    | NP_065079.1    | 1.10-34      | vesicular glutamate transporter 2 [Homo sapiens]                                       |                                            |
| <b>GABA</b>                                |                                                                                            |                                   |                           |             |                      |                |              |                                                                                        |                                            |
| GABA                                       | Gamma-aminobutyric acid type B receptor subunit 1                                          | Q9Z0U4.1                          | LOD99_2448                | 1.56E-47    | 24                   | XP_011512755.1 | 1.10-49      | gamma-aminobutyric acid type B receptor subunit 1 isoform X3 [Homo sapiens]            |                                            |
|                                            |                                                                                            |                                   | LOD99_3013                | 2.37E-47    |                      | BAD92027.1     | 1.10-47      | gamma-aminobutyric acid (GABA) B receptor 1 isoform c precursor variant [Homo sapiens] |                                            |
|                                            |                                                                                            |                                   | LOD99_3007                | 2.05E-44    |                      | NP_001305982.1 | 1.10-43      | gamma-aminobutyric acid type B receptor subunit 1 isoform k [Homo sapiens]             |                                            |
|                                            |                                                                                            |                                   | LOD99_13509               | 2.30E-35    |                      | NP_005449.5    | 1.10-39      | gamma-aminobutyric acid type B receptor subunit 2 precursor [Homo sapiens]             |                                            |
|                                            |                                                                                            |                                   | plus 19 more**            |             |                      |                |              |                                                                                        |                                            |
| ABAT                                       | 4-aminobutyrate aminotransferase, mitochondrial isoform 2 precursor [Mus mu:NP_001164449.1 |                                   | LOD99_2634                | 2.79E-08    | 2                    | XP_005248394.1 | 1.10-89      | alanine-glyoxylate aminotransferase 2, mitochondrial isoform X1 [Homo sapiens]         |                                            |
| TAT                                        | tyrosine aminotransferase [Homo sapiens]                                                   | NP_000344.1                       | LOD99_10114               | 1.22E-124   | 7                    | NP_000344.1    | 1.10-123     | tyrosine aminotransferase [Homo sapiens]                                               |                                            |
| <b>Nitric Oxide</b>                        |                                                                                            |                                   |                           |             |                      |                |              |                                                                                        |                                            |
| NOS                                        | nitric oxide synthase [Mus musculus domesticus]                                            | BAA03415.1                        | LOD99_11608               | 2.07E-69    | 4                    | NP_000932.3    | 0            | NADPH-cytochrome P450 reductase [Homo sapiens]                                         |                                            |
| sGC                                        | guanylate cyclase [Mus musculus]                                                           | CAC41350.1                        | LOD99_7276                | 2.15E-143   | 91                   | NP_001513.2    | 1.10-120     | retinal guanylyl cyclase 2 [Homo sapiens]                                              |                                            |
|                                            |                                                                                            |                                   | plus 87 more sequences**  |             |                      |                |              |                                                                                        |                                            |
| PKG-1                                      | cGMP-dependent protein kinase 1 isoform 1 [Homo sapiens]                                   | NP_001091982.1                    | LOD99_8398                | 0           | 289                  | NP_006249.1    | 0            | cGMP-dependent protein kinase 1 isoform 2 [Homo sapiens]                               |                                            |
|                                            |                                                                                            |                                   | plus 283 more sequences** |             |                      |                |              |                                                                                        |                                            |
| <b>Acetylcholinesterase</b>                |                                                                                            |                                   |                           |             |                      |                |              |                                                                                        |                                            |
| Ach                                        | acetylcholinesterase precursor [Bos taurus]                                                | NP_001069688.1                    | LOD99_15812               | 4.78E-56    | 5                    | NP_000656.1    | -57          | acetylcholinesterase isoform E4-E6 precursor [Homo sapiens]                            |                                            |

\*\* note some of the 'plus more sequences' appear to be different regions of the same gene

considered absent  
present

**Table S17: HMMER searches in *O. minuta* for voltage gated ion channels**

HMMER (Johnson et al. 2010) searches were carried out with hmmer builds generated from alignments of ion channels (provided in Liebeskind et al. 2015). HMMER profiles for Kv channels from Warren Gallin's Voltage Gated Potassium Channel database were also used (<http://vkcdb.biology.ualberta.ca/>). For same sequence hits with different searches the highest e-value is given. This analysis is completed by the phylogenetic analysis provided in Fig. S12 and S13.

|                                               | O. minuta Sequence | full sequence |       |       | best domain |       |           | # domains |   | Description                                      |
|-----------------------------------------------|--------------------|---------------|-------|-------|-------------|-------|-----------|-----------|---|--------------------------------------------------|
|                                               |                    | E-value       | score | bias  | E-value     | score | best bias | exp       | N |                                                  |
| <b>CaV</b><br>voltage gated calcium channels  | LOD99_1634         | 1.90E-41      | 141.5 | 43    | 6.10E-21    | 73.6  | 25.4      | 3         | 2 | Two-pore channel 1                               |
|                                               | LOD99_538          | 4.70E-41      | 140.2 | 18    | 5.50E-33    | 113.5 | 9.3       | 1.8       | 2 | Cation channel sperm-associated protein 2        |
|                                               | LOD99_1635         | 5.20E-40      | 136.8 | 46.4  | 9.20E-20    | 69.7  | 28.7      | 3         | 2 | Two-pore channel 1                               |
|                                               | LOD99_3412         | 1.70E-37      | 128.4 | 19    | 4.20E-37    | 127.1 | 19.1      | 1.3       | 1 | Hypothetical protein                             |
|                                               | LOD99_2879         | 6.40E-37      | 126.5 | 53.5  | 9.80E-16    | 56.3  | 18        | 3.5       | 4 | Two pore calcium channel protein 1 isoform X3    |
|                                               | LOD99_10799        | 8.90E-36      | 122.7 | 20    | 1.20E-35    | 122.3 | 20        | 1.1       | 1 | Ion transporter                                  |
|                                               | LOD99_13596        | 1.80E-33      | 115.1 | 93.4  | 4.70E-14    | 50.7  | 34.6      | 3.5       | 4 | MGC115225 protein                                |
|                                               | LOD99_8690         | full sequence | 94.3  | 30.7  | 2.20E-21    | 75.1  | 15.6      | 2         | 2 | Cation channel sperm-associated protein 3        |
|                                               | LOD99_16007        | 2.50E-12      | 45    | 5.3   | 4.40E-12    | 44.2  | 5.3       | 1.2       | 1 | Sodium/hydrogen exchanger 10-like                |
|                                               | LOD99_5612         | 5.80E-06      | 23.9  | 17.7  | 4.90E-05    | 20.9  | 11.6      | 2         | 2 | Hypothetical protein                             |
| <b>NaV</b><br>voltage gated sodium channels   | LOD99_1634         | 1.60E-35      | 121.5 | 40    | 1.60E-29    | 101.6 | 6.6       | 3.3       | 3 | Two-pore channel 1                               |
|                                               | LOD99_1635         | 5.90E-35      | 119.6 | 41.2  | 3.60E-29    | 100.4 | 7.2       | 3.3       | 3 | Two-pore channel 1                               |
|                                               | LOD99_3412         | 1.80E-34      | 118   | 27.8  | 6.90E-26    | 89.6  | 18.2      | 2         | 2 | Hypothetical protein                             |
|                                               | LOD99_538          | 9.70E-30      | 102.3 | 15.7  | 1.20E-17    | 62.2  | 7.4       | 2.1       | 2 | Cation sperm-associated protein 2                |
|                                               | LOD99_8690         | 1.20E-28      | 98.8  | 30.8  | 2.10E-25    | 87.9  | 12.4      | 2         | 2 | Cation sperm-associated protein 2                |
|                                               | LOD99_10799        | 5.00E-27      | 93.4  | 30.3  | 2.50E-26    | 91    | 29.8      | 1.9       | 1 | Ion transporter                                  |
|                                               | LOD99_2879         | 1.90E-23      | 81.5  | 59.5  | 2.10E-14    | 51.5  | 20.4      | 4.2       | 4 | Two pore calcium channel protein 1               |
|                                               | LOD99_16007        | 3.00E-21      | 74.2  | 10    | 5.40E-21    | 73.4  | 10        | 1.3       | 1 | Sodium/hydrogen exchanger 10-like                |
|                                               | LOD99_13596        | 1.30E-19      | 68.8  | 57.1  | 1.30E-13    | 48.9  | 28.4      | 3.7       | 3 | MGC115225 protein                                |
|                                               | LOD99_5612         | 1.50E-09      | 35.4  | 17    | 1.90E-07    | 28.4  | 12.7      | 2         | 2 | Hypothetical protein                             |
|                                               | LOD99_13410        | 4.80E-07      | 27.1  | 7.4   | 4.80E-07    | 27.1  | 7.4       | 2.3       | 2 | Cilia-and flagella-associated protein 43         |
|                                               | LOD99_10098B       | 0.0026        | 14.8  | 0     | 0.0029      | 14.6  | 0         | 1.1       | 1 | Hypothetical protein                             |
|                                               | LOD99_5102         | 0.0044        | 14    | 0.4   | 0.0056      | 13.6  | 0.4       | 1.1       | 1 | Calmodulin and related proteins                  |
|                                               | LOD99_10098        | 0.0046        | 13.9  | 0     | 0.0053      | 13.7  | 0         | 1.1       | 1 | Hypothetical protein                             |
| <b>Kv</b><br>voltage gated potassium channels | LOD99_1024         | 1.60E-17      | 63.7  | 106.2 | 8.70E-08    | 31.7  | 1.8       | 8.5       | 5 | Hypothetical protein                             |
|                                               | LOD99_8292         | 1.90E-16      | 60.2  | 0.3   | 3.60E-16    | 59.3  | 0.3       | 1.4       | 1 | Potassium channel subfamily member 1             |
|                                               | LOD99_3527         | 5.30E-16      | 58.7  | 11.8  | 5.30E-16    | 58.7  | 11.8      | 2.2       | 2 | Potassium channel subfamily member 1 isoform X21 |
|                                               | LOD99_12281        | 1.30E-14      | 54.2  | 1.1   | 2.60E-14    | 53.2  | 1.1       | 1.4       | 1 | Potassium channel subfamily member 2 isoform X1  |
|                                               | LOD99_10799        | 3.40E-13      | 49.5  | 14.2  | 3.40E-13    | 49.5  | 14.2      | 2.8       | 4 | Ion transporter                                  |
|                                               | LOD99_171          | 9.50E-13      | 48    | 0     | 1.40E-12    | 47.5  | 0         | 1.2       | 1 | Putative potassium channel protein               |
|                                               | LOD99_3254         | 1.80E-12      | 47.1  | 0     | 2.10E-12    | 46.9  | 0         | 1.1       | 1 | BTB/POZ domain-containing protein isoform X2     |
|                                               | LOD99_4149         | 4.60E-12      | 45.8  | 17.1  | 2.90E-10    | 39.8  | 0.2       | 2.9       | 3 | Potassium channel subfamily member 17-like       |
|                                               | LOD99_15024        | 2.10E-11      | 43.6  | 0     | 2.60E-11    | 43.3  | 0         | 1.1       | 1 | K+ channel tetramerisation protein               |
|                                               | LOD99_8690         | 2.70E-10      | 39.9  | 17.8  | 3.00E-10    | 39.8  | 17.2      | 1.4       | 1 | Cation channel sperm-associated 3                |
|                                               | LOD99_3412         | 2.40E-09      | 36.8  | 21.1  | 6.70E-09    | 35.3  | 21.1      | 1.7       | 1 | Hypothetical protein                             |
|                                               | LOD99_4141         | 3.40E-09      | 36.3  | 0     | 4.80E-09    | 35.8  | 0         | 1.2       | 1 | SH3KBP1-binding protein 1                        |
|                                               | LOD99_4255         | 9.40E-08      | 31.6  | 10.5  | 1.60E-07    | 30.8  | 10.5      | 1.3       | 1 | Hypothetical protein                             |
|                                               | LOD99_538          | 3.00E-07      | 29.9  | 13.1  | 3.00E-07    | 29.9  | 13.1      | 2.1       | 3 | Cation channel sperm-associated 2                |
|                                               | LOD99_2415         | 3.20E-07      | 29.8  | 0     | 4.80E-07    | 29.3  | 0         | 1.2       | 1 | BTB/POZ domain-containing protein                |
|                                               | LOD99_2879         | 1.20E-06      | 27.9  | 9.3   | 1.20E-06    | 27.9  | 9.3       | 2.9       | 3 | Two pore calcium protein 1 isoform X3            |
|                                               | LOD99_14396        | 8.20E-06      | 25.2  | 0     | 1.10E-05    | 24.8  | 0         | 1.1       | 1 | Hypothetical protein                             |
|                                               | LOD99_12269        | 1.10E-05      | 24.7  | 0     | 1.40E-05    | 24.4  | 0         | 1.3       | 1 | BTB/POZ domain-containing adapter CUL3-mediate   |
|                                               | LOD99_16007        | 2.70E-05      | 23.5  | 6.6   | 2.70E-05    | 23.5  | 6.6       | 1.9       | 2 | Sodium/hydrogen exchanger 10-like                |
|                                               | LOD99_7230         | 2.90E-05      | 23.4  | 0     | 3.90E-05    | 23    | 0         | 1.2       | 1 | BTB/POZ domain-containing protein                |
| <b>EnAC</b>                                   | LOD99_3778         | 0.0015        | 18.3  | 0.7   | 0.0022      | 17.7  | 0.7       | 1.3       | 1 | Transmembrane protein 206 partial                |
| <b>Leak</b>                                   | LOD99_1634         | 5.70E-34      | 116.8 | 47.1  | 1.30E-18    | 65.9  | 8.4       | 3         | 3 | Two-pore channel 1                               |
|                                               | LOD99_1635         | 1.40E-33      | 115.5 | 47.4  | 3.00E-18    | 64.6  | 8.6       | 3         | 3 | Two-pore channel 1                               |
|                                               | LOD99_2879         | 7.80E-27      | 93.1  | 56.7  | 8.40E-13    | 46.6  | 17        | 3.1       | 3 | Two pore calcium protein 1 isoform X3            |

|                                                                                                                              |              |            |        |      |            |       |      |     |   |                                                 |
|------------------------------------------------------------------------------------------------------------------------------|--------------|------------|--------|------|------------|-------|------|-----|---|-------------------------------------------------|
|                                                                                                                              | LOD99_3412   | 1.60E-25   | 88.7   | 27.4 | 1.30E-14   | 52.7  | 17   | 2   | 2 | Hypothetical protein                            |
|                                                                                                                              | LOD99_538    | 2.70E-25   | 88     | 15.8 | 6.20E-25   | 86.8  | 15.8 | 1.4 | 1 | Cation channel sperm-associated 2               |
|                                                                                                                              | LOD99_8690   | 2.30E-22   | 78.3   | 30.4 | 8.80E-18   | 63.1  | 13.1 | 2.3 | 2 | Cation channel sperm-associated 3               |
|                                                                                                                              | LOD99_10799  | 5.20E-18   | 63.9   | 30.1 | 6.70E-11   | 40.3  | 11.1 | 2.6 | 2 | Ion transporter                                 |
|                                                                                                                              | LOD99_13596  | 7.80E-18   | 63.3   | 61.7 | 7.90E-06   | 23.5  | 3.1  | 4.4 | 4 | MGC115225 protein                               |
|                                                                                                                              | LOD99_11552  | 4.80E-07   | 27.5   | 0.1  | 0.00026    | 18.5  | 0    | 2   | 2 | Myosin regulatory light                         |
|                                                                                                                              | LOD99_5612   | 1.40E-06   | 26     | 7.4  | 1.40E-06   | 26    | 7.4  | 1.8 | 2 | Hypothetical protein                            |
|                                                                                                                              | LOD99_11553  | 3.70E-05   | 21.3   | 0    | 0.022      | 12.1  | 0    | 2   | 2 | Myosin regulatory light                         |
|                                                                                                                              | LOD99_11551  | 9.60E-05   | 19.9   | 0.1  | 0.0056     | 14    | 0.1  | 2   | 2 | Myosin regulatory light                         |
|                                                                                                                              | LOD99_5102   | 0.00066    | 17.1   | 0    | 0.009      | 13.4  | 0    | 2   | 2 | Calmodulin and related                          |
|                                                                                                                              | LOD99_8750   | 0.0025     | 15.2   | 0    | 0.0043     | 14.4  | 0    | 1.5 | 2 | Calmodulin                                      |
|                                                                                                                              | LOD99_15670  | 0.003      | 15     | 0.1  | 0.011      | 13.1  | 0    | 1.7 | 2 | Myosin regulatory light                         |
|                                                                                                                              | LOD99_2361   | 0.0051     | 14.2   | 0    | 0.02       | 12.2  | 0    | 1.9 | 2 | Calmodulin                                      |
| <b>Ano anostamin</b>                                                                                                         | LOD99_15752A | 5.70E-194  | 646    | 19.9 | 1.30E-185  | 618.4 | 18.1 | 3.9 | 2 | Anoctamin-7-like                                |
|                                                                                                                              | LOD99_15752B | 5.80E-194  | 646    | 19.8 | 1.20E-185  | 618.5 | 18   | 3.9 | 2 | Anoctamin-7-like                                |
|                                                                                                                              | LOD99_170A   | 2.60E-180  | 600.9  | 22.6 | 2.40E-163  | 544.9 | 16.5 | 4.8 | 4 | Anoctamin-7-like                                |
|                                                                                                                              | LOD99_170B   | 2.80E-180  | 600.8  | 22.6 | 2.40E-163  | 544.8 | 16.5 | 4.8 | 4 | Anoctamin-7-like                                |
|                                                                                                                              | LOD99_170C   | 3.00E-180  | 600.7  | 22.6 | 2.50E-163  | 544.8 | 16.5 | 4.8 | 4 | Anoctamin-7-like                                |
|                                                                                                                              | LOD99_1335   | 1.80E-173  | 578.3  | 20.7 | 5.10E-155  | 517.3 | 6.5  | 5.1 | 4 | Anoctamin-7-like                                |
|                                                                                                                              | LOD99_15763  | 6.30E-101  | 338.7  | 9.7  | 1.10E-89   | 301.5 | 7    | 2   | 2 | Anoctamin-7-like                                |
|                                                                                                                              | LOD99_15768  | 4.60E-35   | 121.1  | 1    | 2.80E-33   | 115.2 | 1    | 2   | 1 | LOW QUALITY PROTEIN: anoctamin-2                |
|                                                                                                                              | LOD99_15771  | 5.70E-27   | 94.3   | 0    | 4.00E-20   | 71.7  | 0    | 2.2 | 2 | Hypothetical protein                            |
| <b>GIC (glutamate-gated ion channel family)</b>                                                                              | LOD99_8292   | 0.44       | 9.7    | 4.3  | 0.81       | 8.8   | 4.3  | 1.3 | 1 | Potassium channel subfamily member 1            |
| <b>ClC chloride channel</b>                                                                                                  | LOD99_4646   | 1.3E-211   | 704.3  | 24.1 | 2.3E-199   | 663.8 | 18.8 | 3   | 2 | H(+)/Cl(-) exchange transporter isoform X4      |
|                                                                                                                              | LOD99_2395   | 1.6E-182   | 608.3  | 17.6 | 8.3E-90    | 302   | 0    | 3   | 2 | H(+)/Cl(-) exchange transporter                 |
|                                                                                                                              | LOD99_4967   | 6.1E-181   | 603    | 25.7 | 1.5E-94    | 317.7 | 16.9 | 3   | 3 | H(+)/Cl(-) exchange transporter isoform X2      |
|                                                                                                                              | LOD99_1206   | 4.6E-171   | 570.4  | 17.1 | 1.1E-170   | 569.1 | 17.1 | 1.5 | 1 | Hypothetical protein                            |
|                                                                                                                              | LOD99_13962  | 1.9E-86    | 290.9  | 1.4  | 5.4E-68    | 229.9 | 1.6  | 2   | 2 | Chloride transport protein isoform X4           |
|                                                                                                                              | LOD99_13960  | 1.2E-83    | 281.7  | 14.1 | 2.2E-81    | 274.2 | 14.1 | 2.7 | 1 | Chloride transport protein                      |
| <b>CNG-HCN cyclic nucleotide-gated (CNG) channels hyperpolarization-activated cyclic nucleotide-modulated (HCN) channels</b> | LOD99_1024   | 0          | 1294.5 | 75.6 | 3.7E-123   | 411.5 | 10.9 | 5.4 | 4 | Hypothetical protein                            |
|                                                                                                                              | LOD99_239    | 4E-114     | 381.7  | 10.9 | 8.9E-73    | 245.5 | 0    | 2   | 2 | Cyclic nucleotide-gated channel photoreceptor   |
|                                                                                                                              | LOD99_238    | 1.6E-113   | 379.8  | 22.2 | 4.4E-112   | 375   | 22.2 | 2   | 1 | Cyclic nucleotide-gated channel photoreceptor   |
|                                                                                                                              | LOD99_3764   | 1.2E-57    | 195.6  | 21.1 | 4.1E-57    | 193.8 | 21.1 | 1.7 | 1 | Cyclic nucleotide-gated cation beta-1 isof      |
|                                                                                                                              | LOD99_1250   | 1.2E-54    | 185.7  | 22.6 | 5.3E-54    | 183.6 | 22.6 | 1.7 | 1 | Cyclic-nucleotide-gated cation channel          |
|                                                                                                                              | LOD99_238    | 4.1E-49    | 167.5  | 26.8 | 1.6E-47    | 162.2 | 26.8 | 2   | 1 | Cyclic nucleotide-gated channel photoreceptor   |
|                                                                                                                              | LOD99_8398   | 6E-46      | 157    | 1.1  | 6.1E-23    | 81.2  | 0.1  | 2.2 | 2 | CGMP-dependent protein kinase                   |
|                                                                                                                              | LOD99_3573   | 1E-43      | 149.7  | 2.2  | 1E-26      | 93.6  | 0.1  | 2.9 | 3 | CGMP-dependent protein kinase, 1                |
|                                                                                                                              | LOD99_9579   | 7.9E-36    | 123.7  | 0    | 2.4E-17    | 62.7  | 0    | 2.1 | 2 | CAMP-dependent protein kinase I-alpha regulat   |
|                                                                                                                              | LOD99_7853   | 3.2E-34    | 118.4  | 0.1  | 4E-34      | 118   | 0.1  | 1.1 | 1 | Cyclic nucleotide-gated olfactory partial       |
|                                                                                                                              | LOD99_12665  | 2E-26      | 92.7   | 0.3  | 2.3E-13    | 49.6  | 0.1  | 2   | 2 | CAMP-dependent protein kinase II-alpha regula   |
|                                                                                                                              | LOD99_6963   | 3.5E-12    | 45.7   | 0.1  | 5.5E-12    | 45.1  | 0.1  | 1.3 | 1 | Hypothetical protein                            |
|                                                                                                                              | LOD99_6099   | 3.1E-10    | 39.3   | 0.4  | 0.00000007 | 31.6  | 0.1  | 2   | 2 | Cyclic nucleotide-binding domain-containing     |
|                                                                                                                              | LOD99_3426   | 8.4E-09    | 34.6   | 0    | 0.063      | 11.9  | 0    | 3.2 | 3 | Neuropathy target esterase,                     |
|                                                                                                                              | LOD99_349    | 0.00000014 | 30.5   | 0.3  | 0.00000085 | 28    | 0.2  | 1.9 | 2 | Hypothetical protein                            |
|                                                                                                                              | LOD99_4149   | 0.0000019  | 26.8   | 7.3  | 0.000032   | 22.8  | 0.3  | 2.7 | 2 | Potassium channel subfamily member 17-like      |
|                                                                                                                              | LOD99_16007  | 0.00033    | 19.5   | 6.1  | 0.52       | 8.9   | 0    | 3.2 | 3 | Sodium/hydrogen exchanger 10-like               |
|                                                                                                                              | LOD99_8292   | 0.0019     | 17     | 0    | 0.0035     | 16.1  | 0    | 1.3 | 1 | Potassium channel subfamily member 1            |
|                                                                                                                              | LOD99_12281  | 0.0031     | 16.2   | 2.4  | 0.006      | 15.3  | 2.4  | 1.5 | 1 | Potassium channel subfamily member 2 isoform X1 |
|                                                                                                                              | LOD99_6960   | 0.0072     | 15     | 0    | 0.011      | 14.4  | 0    | 1.3 | 1 | Hypothetical protein                            |
| <b>P2x purinoreceptor</b>                                                                                                    | LOD99_4230   | 1.5E-100   | 336.8  | 2.7  | 2E-100     | 336.4 | 2.7  | 1   | 1 | P2X purinoreceptor 4-like X2                    |
|                                                                                                                              | LOD99_15028  | 5.4E-40    | 137.5  | 1.2  | 8.1E-22    | 77.6  | 0.2  | 2.7 | 2 | Hypothetical protein                            |
|                                                                                                                              | LOD99_5071   | 0.0036     | 16.2   | 0    | 0.0049     | 15.8  | 0    | 1.2 | 1 | Hypothetical protein                            |
| <b>PCC (polycystin cation channel)</b>                                                                                       | LOD99_3375   | 7.50E-42   | 143.4  | 32.2 | 6.10E-39   | 133.8 | 25   | 2.1 | 2 | Mucolipin-3                                     |
|                                                                                                                              | LOD99_4522   | 2.50E-21   | 75.7   | 16.9 | 2.50E-21   | 75.7  | 16.9 | 2.2 | 2 | Transient receptor potential pyrexia-like       |
|                                                                                                                              | LOD99_8690   | 2.40E-17   | 62.6   | 17.9 | 3.40E-17   | 62.1  | 17.9 | 1.2 | 1 | Cation channel sperm-associated 3               |
|                                                                                                                              | LOD99_3412   | 7.60E-16   | 57.6   | 18.9 | 2.40E-15   | 56    | 18.8 | 1.8 | 1 | Hypothetical protein                            |



|                                                                    |             |          |        |       |             |       |          |      |   |                                                  |
|--------------------------------------------------------------------|-------------|----------|--------|-------|-------------|-------|----------|------|---|--------------------------------------------------|
|                                                                    | LOD99_1219  | 4.10E-13 | 48.6   | 22.1  | 8.20E-10    | 37.7  | 16       | 2.3  | 2 | Hypothetical protein                             |
|                                                                    | LOD99_10799 | 8.60E-11 | 41     | 24.9  | 8.60E-11    | 41    | 24.9     | 1.6  | 1 | Ion transporter                                  |
|                                                                    | LOD99_538   | 2.50E-09 | 36.1   | 20.6  | 5.50E-09    | 35    | 20.6     | 1.5  | 1 | Cation channel sperm-associated 2                |
|                                                                    | LOD99_5717  | 5.90E-09 | 34.9   | 17.8  | 5.90E-09    | 34.9  | 17.8     | 2    | 2 | Transient receptor potential channel subfam      |
|                                                                    | LOD99_5720  | 1.10E-08 | 33.9   | 28.3  | 2.40E-08    | 32.9  | 28       | 1.5  | 1 | Transient receptor potential channel subfam      |
|                                                                    | LOD99_1635  | 1.70E-08 | 33.3   | 55.1  | 2.50E-07    | 29.5  | 13.3     | 4.6  | 4 | Two-pore channel 1                               |
|                                                                    | LOD99_1634  | 3.00E-08 | 32.6   | 55.5  | 2.50E-07    | 29.5  | 13.3     | 4.6  | 4 | Two-pore channel 1                               |
|                                                                    | LOD99_6819  | 5.00E-06 | 25.2   | 22.8  | 5.00E-06    | 25.2  | 22.8     | 2.7  | 2 | Transient receptor potential channel subfam      |
|                                                                    | LOD99_13596 | 5.60E-06 | 25.1   | 64.3  | 1.50E-05    | 23.7  | 21.4     | 5.2  | 2 | MGC115225 protein                                |
|                                                                    | LOD99_3407  | 1.20E-05 | 24     | 19.5  | 1.20E-05    | 24    | 19.5     | 2.1  | 2 | Hypothetical protein                             |
|                                                                    | LOD99_15407 | 1.70E-05 | 23.5   | 18.6  | 1.70E-05    | 23.5  | 18.6     | 3.2  | 3 | Transient receptor potential channel subfam      |
|                                                                    | LOD99_7638  | 3.20E-05 | 22.6   | 0.3   | 3.20E-05    | 22.6  | 0.3      | 3.2  | 2 | Ankyrin                                          |
|                                                                    | LOD99_7638  | 4.20E-05 | 22.2   | 0.3   | 4.20E-05    | 22.2  | 0.3      | 3.2  | 2 | Ankyrin                                          |
|                                                                    | LOD99_14651 | 0.00024  | 19.7   | 1.8   | 0.00024     | 19.7  | 1.8      | 3.3  | 2 | Hypothetical protein                             |
|                                                                    | LOD99_5693  | 0.00028  | 19.5   | 1.1   | 0.00028     | 19.5  | 1.1      | 3    | 3 | Vanilloid receptor                               |
|                                                                    | LOD99_746   | 0.00033  | 19.3   | 0.7   | 0.00033     | 19.3  | 0.7      | 3.3  | 3 | Ankyrin repeat protein                           |
|                                                                    | LOD99_12646 | 0.00037  | 19.1   | 4.2   | 0.00037     | 19.1  | 4.2      | 3.6  | 4 | Ankyrin repeat containing                        |
|                                                                    | LOD99_12619 | 0.00085  | 17.9   | 4     | 0.00085     | 17.9  | 4        | 3.3  | 3 | Hypothetical protein                             |
|                                                                    | LOD99_2879  | 0.001    | 17.6   | 72.2  | 0.017       | 13.6  | 8.3      | 4.2  | 3 | Two pore calcium protein 1 isoform X3            |
|                                                                    | LOD99_2914  | 0.0036   | 15.8   | 0.6   | 0.0036      | 15.8  | 0.6      | 3.4  | 4 | Ankyrin repeat domain-containing 29-like         |
| <b>RyR</b>                                                         | LOD99_3002  | 0        | 1180.5 | 112.5 | 5.5E-178    | 594.1 | 65       | 6    | 4 | Inositol 1,4,5-trisphosphate receptor 1 isofo    |
| <b>Ryanodine receptor</b>                                          | LOD99_4139  | 0        | 1110.2 | 63.9  | 1.5E-188    | 629.1 | 15       | 5.1  | 4 | Hypothetical protein                             |
|                                                                    | LOD99_631   | 1.2E-208 | 695.8  | 79.1  | 6.1E-69     | 232.5 | 10.6     | 10.4 | 8 | Ryanodine receptor 3                             |
|                                                                    | LOD99_255   | 2.3E-189 | 631.8  | 87.8  | 2.9E-95     | 319.8 | 23.8     | 9.9  | 8 | Ryanodine receptor 44F-like X1                   |
|                                                                    | LOD99_4139  | 1.3E-170 | 569.7  | 11.7  | 3.2E-170    | 568.3 | 11.7     | 1.5  | 1 | Hypothetical protein                             |
|                                                                    | LOD99_3298  | 0.0014   | 15.8   | 0.3   | 0.052       | 10.6  | 0.00E+00 | 2    | 2 | Hypothetical protein                             |
| <b>Kchannel Slo</b>                                                | LOD99_3527  | 1.2E-122 | 410.6  | 5.7   | 6.7E-90     | 302.3 | 4.2      | 2.6  | 2 | Potassium channel subfamily member 1 isoform X21 |
| <b>High-conductance K+ channels encoded by the Slo gene family</b> | LOD99_4255  | 7.9E-112 | 374.8  | 2.7   | 6.3E-84     | 282.5 | 0.7      | 2.5  | 3 | Hypothetical protein                             |
|                                                                    | LOD99_8292  | 7.3E-105 | 351.8  | 4.2   | 1.3E-82     | 278.2 | 4.4      | 2.6  | 2 | Potassium channel subfamily member 1             |
|                                                                    | LOD99_12281 | 1.5E-92  | 311.1  | 9     | 2.8E-91     | 306.9 | 3.2      | 3.3  | 3 | Potassium channel subfamily member 2 isoform X1  |
|                                                                    | LOD99_1024  | 1.5E-14  | 53     | 60    | 0.0000016   | 26.4  | 1.8      | 4.9  | 4 | Hypothetical protein                             |
|                                                                    | LOD99_4149  | 5.7E-10  | 37.8   | 10.2  | 0.000000015 | 33.1  | 0.6      | 2.4  | 2 | Potassium channel subfamily member 17-like       |
| <b>Two Pore Channel</b>                                            | LOD99_13596 | 3.6E-137 | 458.5  | 44.8  | 5.9E-94     | 315.6 | 28.5     | 2.1  | 2 | MGC115225 protein                                |
|                                                                    | LOD99_1634  | 3.1E-126 | 422.3  | 43.9  | 9E-102      | 341.5 | 35.4     | 2    | 2 | Two-pore channel 1                               |
|                                                                    | LOD99_1635  | 1.3E-125 | 420.2  | 43.2  | 1.2E-100    | 337.8 | 35.9     | 2    | 2 | Two-pore channel 1                               |
|                                                                    | LOD99_2879  | 5.3E-117 | 391.8  | 53.6  | 8.2E-97     | 325.1 | 42.5     | 2    | 2 | Two pore calcium protein 1 isoform X3            |
|                                                                    | LOD99_538   | 1.7E-32  | 112.5  | 9.1   | 2.2E-32     | 112.1 | 9.1      | 1.1  | 1 | Cation channel sperm-associated 2                |
|                                                                    | LOD99_3412  | 2.2E-32  | 112.2  | 20.3  | 2.7E-32     | 111.8 | 20.3     | 1.1  | 1 | Hypothetical protein                             |
|                                                                    | LOD99_10799 | 1.7E-30  | 105.9  | 21.9  | 2.1E-30     | 105.6 | 21.9     | 1    | 1 | Ion transporter                                  |
|                                                                    | LOD99_8690  | 3.6E-22  | 78.4   | 22.1  | 3.6E-22     | 78.4  | 22.1     | 1.5  | 1 | Cation channel sperm-associated 3                |
|                                                                    | LOD99_222   | 8.8E-20  | 70.5   | 1     | 5.2E-09     | 34.9  | 0        | 2    | 2 | Centrin-3                                        |
|                                                                    | LOD99_3273  | 1.2E-19  | 70     | 2     | 2.1E-09     | 36.2  | 0.2      | 2    | 2 | Caltractin isoform X1                            |
|                                                                    | LOD99_6789  | 3.6E-17  | 61.9   | 0.4   | 9.3E-09     | 34.1  | 0.1      | 2    | 2 | Calmodulin                                       |
|                                                                    | LOD99_2361  | 5.4E-17  | 61.3   | 0     | 0.000000005 | 35    | 0        | 2    | 2 | Calmodulin                                       |
|                                                                    | LOD99_8750  | 1.4E-16  | 59.9   | 0     | 0.000000061 | 31.4  | 0        | 2    | 2 | Calmodulin                                       |
|                                                                    | LOD99_16024 | 2.5E-16  | 59.1   | 8.2   | 3.3E-09     | 35.6  | 0.3      | 3.5  | 4 | LOW QUALITY PROTEIN: protein 12                  |
|                                                                    | LOD99_16025 | 6.7E-15  | 54.4   | 1.8   | 0.00000087  | 27.6  | 0.9      | 2    | 2 | EF-hand_1 domain-containing protein,             |
|                                                                    | LOD99_13633 | 8.4E-14  | 50.7   | 0.3   | 0.0000015   | 26.8  | 0        | 2    | 2 | Calmodulin-like                                  |
|                                                                    | LOD99_5102  | 1E-12    | 47.1   | 0.1   | 0.000015    | 23.5  | 0        | 2    | 2 | Calmodulin and related                           |
|                                                                    | LOD99_5612  | 9.2E-12  | 44     | 15.3  | 3E-11       | 42.3  | 8.9      | 2.1  | 2 | Hypothetical protein                             |
|                                                                    | LOD99_16023 | 1E-11    | 43.9   | 3     | 0.00000062  | 28    | 0.6      | 2    | 2 | Calmodulin-A-like isoform X1                     |
|                                                                    | LOD99_4496  | 5.7E-11  | 41.4   | 3.8   | 0.00000092  | 27.5  | 0.4      | 2    | 2 | EF-hand calcium-binding domain-containing        |
|                                                                    | LOD99_11552 | 1.4E-10  | 40.1   | 0.2   | 0.000028    | 22.6  | 0        | 2.2  | 2 | Myosin regulatory light                          |
|                                                                    | LOD99_11553 | 1.7E-10  | 39.8   | 0.3   | 0.000021    | 23    | 0        | 2    | 2 | Myosin regulatory light                          |
|                                                                    | LOD99_11743 | 1.9E-10  | 39.7   | 0.4   | 0.000000012 | 33.7  | 0        | 2    | 2 | Calmodulin-like protein 11                       |
|                                                                    | LOD99_13997 | 2.3E-10  | 39.4   | 1     | 0.0000056   | 24.9  | 0.8      | 2    | 2 | Hypothetical protein                             |

|             |             |       |      |             |       |          |          |   |                                                    |
|-------------|-------------|-------|------|-------------|-------|----------|----------|---|----------------------------------------------------|
| LOD99_8285  | 1.9E-09     | 36.4  | 0.7  | 0.000067    | 21.3  | 0.3      | 2.2      | 2 | Calcium uptake protein mitochondrial isoform X2    |
| LOD99_655   | 0.00000011  | 33.8  | 3.2  | 0.00017     | 20    | 0.2      | 2.1      | 2 | Calmodulin-like                                    |
| LOD99_13410 | 0.000000022 | 32.8  | 7.7  | 0.000000022 | 32.8  | 7.7      | 2.5      | 2 | Cilia- and flagella-associated 43                  |
| LOD99_13585 | 0.000000045 | 31.8  | 0.2  | 0.00000025  | 29.4  | 0.1      | 1.8      | 2 | Calmodulin                                         |
| LOD99_4634  | 0.000000071 | 31.2  | 0    | 0.00018     | 19.9  | 0        | 2        | 2 | Calcyphosin-like protein                           |
| LOD99_1978  | 0.000000082 | 31    | 0.3  | 0.0004      | 18.8  | 0.1      | 2.1      | 2 | Protein phosphatase 3 subunit                      |
| LOD99_15670 | 0.000000088 | 30.9  | 0.1  | 0.0029      | 15.9  | 0        | 2        | 2 | Myosin regulatory light                            |
| LOD99_13996 | 0.00000011  | 30.5  | 1.7  | 0.0000011   | 27.3  | 1.5      | 1.9      | 2 | Hypothetical protein                               |
| LOD99_5752  | 0.00000012  | 30.4  | 0    | 0.0068      | 14.7  | 0        | 2        | 2 | Myosin-2 essential light isoform X1                |
| LOD99_12384 | 0.00000055  | 28.2  | 1    | 0.00000072  | 27.8  | 1        | 1.1      | 1 | Hypothetical protein                               |
| LOD99_9717  | 0.00000056  | 28.2  | 0    | 0.00078     | 17.8  | 0        | 2.4      | 2 | Calcium uptake protein mitochondrial-like isofo    |
| LOD99_14810 | 0.00000089  | 27.5  | 0.1  | 0.00000099  | 27.4  | 0.1      | 1.1      | 1 | Calmodulin                                         |
| LOD99_15745 | 0.00000091  | 27.5  | 2.4  | 0.0000011   | 27.2  | 1        | 1.6      | 2 | Hypothetical protein                               |
| LOD99_13206 | 0.000001    | 27.3  | 0.1  | 0.0000014   | 26.8  | 0.1      | 1.1      | 1 | Caltractin                                         |
| LOD99_11551 | 0.0000012   | 27.1  | 0.1  | 0.014       | 13.6  | 0.1      | 2        | 2 | Myosin regulatory light                            |
| LOD99_5921  | 0.0000016   | 26.7  | 0.1  | 0.000002    | 26.4  | 0.1      | 1.1      | 1 | Troponin C, isoform                                |
| LOD99_254   | 0.0000023   | 26.2  | 0    | 0.0043      | 15.4  | 1.00E-01 | 2.20E+00 | 2 | Hypothetical protein                               |
| LOD99_8752  | 0.0000028   | 25.9  | 1.4  | 0.013       | 13.8  | 0.5      | 2        | 2 | Troponin isoform 2                                 |
| LOD99_4668  | 0.000011    | 23.9  | 0.7  | 0.0076      | 14.5  | 0        | 2        | 2 | Hypothetical protein                               |
| LOD99_15016 | 0.00003     | 22.5  | 0.2  | 0.0055      | 15    | 0.1      | 2.3      | 2 | Neurocalcin homolog                                |
| LOD99_12296 | 0.000047    | 21.8  | 1.6  | 0.0072      | 14.6  | 0.2      | 2        | 2 | Sorcin isoform X1                                  |
| LOD99_631   | 0.00007     | 21.3  | 17.3 | 0.13        | 10.5  | 0        | 3.5      | 3 | Ryanodine receptor 3                               |
| LOD99_4139  | 0.000085    | 21    | 6.8  | 0.00018     | 19.9  | 6.8      | 1.4      | 1 | Hypothetical protein                               |
| LOD99_12355 | 0.000092    | 20.9  | 0    | 0.00014     | 20.3  | 0        | 1.1      | 1 | Fimbrin                                            |
| LOD99_2539  | 0.00019     | 19.8  | 0    | 0.044       | 12    | 0        | 2        | 2 | Hypothetical protein                               |
| LOD99_13581 | 0.00033     | 19.1  | 0.1  | 0.00046     | 18.6  | 0.1      | 1.1      | 1 | EF-hand domain-containing family B-like            |
| LOD99_13643 | 0.00037     | 18.9  | 0.7  | 0.00054     | 18.3  | 0.7      | 1.1      | 1 | Glycerol-3-phosphate dehydrogenase, mitochondrial- |
| LOD99_11717 | 0.00047     | 18.5  | 0.2  | 0.00058     | 18.2  | 0.2      | 1.2      | 1 | Hypothetical protein                               |
| LOD99_2930  | 0.00092     | 17.6  | 0.1  | 0.0015      | 16.9  | 0.1      | 1.2      | 1 | WD repeat-containing protein Y chromosome-like     |
| LOD99_13512 | 0.0011      | 17.3  | 0.1  | 0.0065      | 14.8  | 0        | 1.8      | 2 | Hypothetical protein, partial                      |
| LOD99_4650  | 0.0015      | 16.9  | 0    | 0.002       | 16.4  | 0        | 1.2      | 1 | EF-hand domain-containing protein                  |
| LOD99_3177  | 0.0038      | 15.5  | 0.1  | 0.005       | 15.1  | 0.1      | 1.3      | 1 | Apoptosis-linked gene 2                            |
| LOD99_15804 | 0.006       | 14.9  | 0.4  | 0.0068      | 14.7  | 0.4      | 1.1      | 1 | Allograft inflammatory factor                      |
| LOD99_7638  | 0.0066      | 14.7  | 15.4 | 0.16        | 10.2  | 0.3      | 2.4      | 2 | Ankyrin                                            |
| LOD99_5717  | 8.2E-59     | 199.5 | 36.3 | 1.9E-44     | 152.3 | 31.6     | 9.2      | 3 | Transient receptor potential channel subfam        |
| LOD99_5720  | 5.9E-57     | 193.4 | 40.4 | 4.2E-31     | 108.4 | 2.35E+01 | 9.70E+00 | 4 | Transient receptor potential channel subfam        |
| LOD99_12740 | 1.6E-56     | 192   | 21.5 | 6.9E-56     | 189.9 | 2.15E+01 | 1.90E+00 | 1 | Transient receptor potential channel subfam        |
| LOD99_13716 | 5.3E-54     | 183.7 | 53.7 | 5.8E-33     | 114.6 | 2.81E+01 | 9.30E+00 | 4 | Transient receptor potential channel subfam        |
| LOD99_3407  | 3.4E-47     | 161.3 | 33.4 | 2.3E-35     | 122.4 | 2.48E+01 | 3.3      | 3 | Hypothetical protein                               |
| LOD99_1219  | 4.1E-47     | 161.1 | 15.2 | 9.6E-47     | 159.9 | 15.2     | 1.5      | 1 | Hypothetical protein                               |
| LOD99_4631  | 1.5E-43     | 149.3 | 19.1 | 8.2E-34     | 117.3 | 16.4     | 6.6      | 3 | Transient receptor potential channel subfam        |
| LOD99_4522  | 3.2E-41     | 141.7 | 32.6 | 3.5E-38     | 131.7 | 32.6     | 3        | 1 | Transient receptor potential pyrexia-like          |
| LOD99_6819  | 2.1E-38     | 132.4 | 25.8 | 6.3E-38     | 130.9 | 25.8     | 1.7      | 1 | Transient receptor potential channel subfam        |
| LOD99_746   | 5.4E-35     | 121.2 | 21.6 | 6.1E-24     | 84.9  | 13.8     | 4.1      | 3 | Ankyrin repeat protein                             |
| LOD99_13591 | 5.6E-35     | 121.2 | 25.9 | 5.8E-20     | 71.8  | 19.4     | 6.6      | 3 | AAEL014742-PA, partial                             |
| LOD99_15407 | 1.8E-33     | 116.2 | 35   | 1.3E-32     | 113.4 | 35       | 2.3      | 1 | Transient receptor potential channel subfam        |
| LOD99_9808  | 7.5E-33     | 114.2 | 28.4 | 2.6E-23     | 82.8  | 17.5     | 3.6      | 2 | Ankyrin repeat protein                             |
| LOD99_9808  | 2.3E-32     | 112.6 | 33.8 | 3.3E-23     | 82.5  | 17       | 5.5      | 2 | LOW QUALITY PROTEIN: protein                       |
| LOD99_12388 | 4.2E-32     | 111.7 | 26.4 | 1.1E-31     | 110.3 | 26.4     | 1.7      | 1 | Transient receptor potential channel subfam        |
| LOD99_11812 | 1.1E-31     | 110.3 | 20   | 1.8E-17     | 63.6  | 18.9     | 5.5      | 2 | Ankyrin-3                                          |
| LOD99_11859 | 3E-31       | 108.9 | 24.3 | 1E-16       | 61.1  | 21.7     | 5.2      | 3 | Ankyrin-3-like isoform X3                          |
| LOD99_2913  | 2.4E-30     | 105.9 | 22.9 | 4.1E-22     | 78.9  | 13.1     | 4.5      | 2 | Hypothetical protein                               |
| LOD99_2914  | 6.6E-30     | 104.5 | 18.8 | 2.3E-19     | 69.9  | 13.5     | 3.3      | 2 | Ankyrin repeat domain-containing 29-like           |
| LOD99_12619 | 7.2E-30     | 104.4 | 23.4 | 6.6E-21     | 74.9  | 19.3     | 4.3      | 3 | Hypothetical protein                               |

**TRP channels**  
**Transient receptor potential channel**

|             |             |       |      |             |      |          |          |                                                   |
|-------------|-------------|-------|------|-------------|------|----------|----------|---------------------------------------------------|
| LOD99_10303 | 4.1E-29     | 101.9 | 32.1 | 1.4E-19     | 70.5 | 17.9     | 6        | 3 Serine/threonine-protein phosphatase 6          |
| LOD99_11817 | 5.8E-29     | 101.4 | 30.7 | 6.6E-18     | 65   | 21.5     | 5.4      | 3 Ankyrin repeat protein                          |
| LOD99_7638  | 1.7E-28     | 99.9  | 19   | 8E-21       | 74.6 | 13.5     | 3        | 2 Ankyrin                                         |
| LOD99_7638  | 3.8E-28     | 98.7  | 21.4 | 1.2E-20     | 74.1 | 13.5     | 3.7      | 3 Ankyrin                                         |
| LOD99_13881 | 2.8E-27     | 95.8  | 31.7 | 4.4E-21     | 75.5 | 23.1     | 2.1      | 2 Hypothetical protein                            |
| LOD99_712   | 5.7E-26     | 91.6  | 30.9 | 1.2E-22     | 80.6 | 30.9     | 3.2      | 1 Long-chain-fatty-acid-CoA ligase                |
| LOD99_2912  | 7.2E-26     | 91.2  | 20.4 | 1E-16       | 61.1 | 14.2     | 3.7      | 3 Ankyrin repeat domain-containing 29-like        |
| LOD99_2818  | 1.6E-25     | 90.1  | 22   | 1.5E-22     | 80.3 | 22       | 3.8      | 1 Hypothetical protein                            |
| LOD99_2880  | 2.8E-25     | 89.3  | 28.1 | 1.4E-17     | 63.9 | 21.7     | 4.3      | 2 Ankyrin repeat domain-containing 29-like        |
| LOD99_5693  | 3.2E-25     | 89.1  | 21.2 | 2.5E-22     | 79.6 | 21.2     | 3.3      | 1 Vanilloid receptor                              |
| LOD99_12340 | 6.9E-25     | 88    | 29.4 | 1.3E-11     | 44.3 | 15.1     | 5.6      | 2 Ankyrin repeat protein                          |
| LOD99_12646 | 2E-24       | 86.5  | 35.3 | 2.1E-15     | 56.8 | 28.6     | 4.4      | 3 Ankyrin repeat containing                       |
| LOD99_15265 | 2.8E-24     | 86    | 52.6 | 9.5E-14     | 51.4 | 12.9     | 11.6     | 10 Ankyrin repeat protein                         |
| LOD99_15032 | 1.9E-23     | 83.2  | 44   | 5.3E-15     | 55.5 | 15.3     | 10.2     | 7 Hypothetical protein                            |
| LOD99_3470  | 2E-23       | 83.2  | 29.2 | 4.5E-14     | 52.4 | 14.7     | 5.7      | 3 Serine/threonine-protein phosphatase 6          |
| LOD99_14651 | 6.8E-23     | 81.4  | 24.1 | 2.2E-20     | 73.2 | 23.9     | 3.8      | 1 Hypothetical protein                            |
| LOD99_5     | 5.6E-22     | 78.4  | 31.6 | 1.1E-13     | 51.1 | 21.7     | 5        | 2 AAEL017480-PA, partial                          |
| LOD99_5818  | 5.8E-22     | 78.4  | 34.3 | 1.4E-16     | 60.7 | 20.6     | 5.6      | 3 Hypothetical protein                            |
| LOD99_8688  | 2.7E-21     | 76.2  | 30.6 | 2.4E-13     | 50   | 17.2     | 5.4      | 2 Ankyrin-1-like                                  |
| LOD99_3522  | 6.2E-20     | 71.7  | 22.9 | 1.4E-12     | 47.5 | 18.9     | 3.5      | 3 Hypothetical protein                            |
| LOD99_3669  | 1.6E-18     | 67.1  | 26.5 | 6.7E-14     | 51.9 | 26.5     | 5.1      | 1 Hypothetical protein                            |
| LOD99_954   | 4.7E-18     | 65.5  | 51.9 | 1.1E-12     | 47.8 | 33.3     | 6.1      | 4 Ankyrin-3-like                                  |
| LOD99_5020  | 1.4E-17     | 64    | 27.4 | 0.000000027 | 33.4 | 21.1     | 5.8      | 4 Hypothetical protein                            |
| LOD99_13129 | 5E-17       | 62.2  | 23.3 | 1.8E-16     | 60.3 | 23.1     | 2        | 1 Hypothetical protein                            |
| LOD99_15022 | 1.8E-15     | 57    | 18.4 | 0.12        | 11.5 | 0.1      | 12.3     | 3 Serine/threonine-protein phosphatase 6          |
| LOD99_4536  | 5.9E-14     | 52.1  | 35.2 | 9.5E-11     | 41.5 | 29.4     | 5        | 2 Ankyrin repeat protein                          |
| LOD99_3412  | 1.9E-13     | 50.3  | 19.3 | 3E-13       | 49.7 | 19.3     | 1.2      | 1 Hypothetical protein                            |
| LOD99_14015 | 2.1E-13     | 50.2  | 1    | 0.29        | 10.3 | 1        | 9.4      | 1 Ankyrin repeat and domain-containing protein ma |
| LOD99_3727  | 5.7E-13     | 48.8  | 1.3  | 0.17        | 11.1 | 0        | 7.7      | 4 Tankyrase-1-like                                |
| LOD99_2619  | 1.2E-11     | 44.4  | 1.7  | 0.043       | 13.1 | 1.8      | 7.1      | 1 Hypothetical protein, partial                   |
| LOD99_12876 | 4.1E-11     | 42.7  | 22.8 | 8.6E-10     | 38.4 | 23.8     | 2.6      | 1 Nacht and ankyrin protein                       |
| LOD99_7581  | 9.6E-11     | 41.5  | 0    | 0.016       | 14.5 | 0        | 5        | 1 Serine/threonine-protein kinase TNNI3K          |
| LOD99_15322 | 1.3E-10     | 41.1  | 0    | 0.043       | 13.1 | 0.1      | 5.5      | 3 Ankyrin repeat domain-containing 27-like        |
| LOD99_8983  | 3.2E-10     | 39.8  | 35.1 | 0.000022    | 23.8 | 22.2     | 4.5      | 2 Serine/threonine-protein phosphatase 6          |
| LOD99_2912  | 3.6E-10     | 39.6  | 5.5  | 0.000007    | 25.5 | 0.2      | 3.7      | 3 Ankyrin repeat domain-containing 29-like        |
| LOD99_2533  | 8.2E-10     | 38.4  | 34.5 | 0.000026    | 23.6 | 21.5     | 5.5      | 2 WD40 repeat-containing protein                  |
| LOD99_8690  | 1.9E-09     | 37.2  | 18   | 2.5E-09     | 36.8 | 18       | 1.3      | 1 Cation channel sperm-associated 3               |
| LOD99_2491  | 2.1E-09     | 37.1  | 31.2 | 0.0000094   | 25.1 | 31.2     | 4.1      | 1 Ankyrin repeat domain-containing 50-like        |
| LOD99_13879 | 0.000000003 | 36.6  | 2.9  | 0.15        | 11.3 | 0        | 6.6      | 4 Transient receptor potential channel subfam     |
| LOD99_2619  | 4.8E-09     | 35.9  | 1.7  | 0.16        | 11.2 | 1.7      | 6.2      | 1 Hypothetical protein, partial                   |
| LOD99_2917  | 0.000000035 | 33.1  | 0.1  | 0.000000049 | 32.6 | 0.1      | 1.2      | 1 Ankyrin repeat domain-containing 29-like        |
| LOD99_14107 | 0.00000015  | 31    | 1.2  | 0.23        | 10.6 | 0        | 4.1      | 4 Ankyrin repeat domain-containing 55-like        |
| LOD99_5813  | 0.00000021  | 30.5  | 0.6  | 1.4         | 8.1  | 0        | 7.4      | 6 Ankyrin repeat protein                          |
| LOD99_9100  | 0.00000023  | 30.4  | 1.6  | 0.033       | 13.4 | 0.8      | 4.3      | 2 Ankyrin repeat domain-containing 16-like        |
| LOD99_2916  | 0.00000028  | 30.1  | 1    | 0.0000003   | 30   | 1        | 1.1      | 1 Hypothetical protein                            |
| LOD99_11576 | 0.00000031  | 29.9  | 0    | 0.1         | 11.8 | 0        | 3.2      | 2 E3 ubiquitin-protein ligase isoform X1          |
| LOD99_12215 | 0.00000049  | 29.3  | 1.1  | 0.18        | 11   | 0.4      | 3.7      | 3 AAEL017480-PA, partial                          |
| LOD99_4626  | 0.0000028   | 26.8  | 0.4  | 0.0079      | 15.5 | 0.1      | 3        | 3 Protein phosphatase 1 subunit 12A-like          |
| LOD99_3521  | 0.0000036   | 26.5  | 2.6  | 3.7         | 6.7  | 0        | 6.5      | 5 Rabankyrin-5-like                               |
| LOD99_5743  | 0.000004    | 26.3  | 0.6  | 0.058       | 12.6 | 6.00E-01 | 3.90E+00 | 1 26S proteasome non-ATPase subunit 10-li         |
| LOD99_538   | 0.0000059   | 25.8  | 25.6 | 0.000014    | 24.5 | 2.56E+01 | 1.40E+00 | 1 Cation channel sperm-associated 2               |

|             |          |      |      |          |      |      |     |   |                                                    |
|-------------|----------|------|------|----------|------|------|-----|---|----------------------------------------------------|
| LOD99_2087  | 0.000072 | 25.5 | 0.1  | 0.079    | 12.2 | 0.1  | 4.5 | 1 | Death-associated protein kinase isoform X2         |
| LOD99_4626  | 0.000082 | 25.3 | 0.5  | 0.0034   | 16.7 | 0.3  | 3   | 2 | MYPT-75D, partial                                  |
| LOD99_14496 | 0.00001  | 25   | 2.5  | 0.068    | 12.4 | 0    | 4.9 | 4 | Serine/threonine-protein phosphatase 6             |
| LOD99_3375  | 0.000011 | 24.8 | 18.6 | 0.000024 | 23.8 | 18.6 | 1.4 | 1 | Mucolipin-3                                        |
| LOD99_14495 | 0.000014 | 24.5 | 4    | 0.5      | 9.6  | 0    | 5.7 | 3 | Ankyrin repeat protein                             |
| LOD99_2298  | 0.000015 | 24.4 | 0.8  | 0.005    | 16.1 | 0.8  | 2.9 | 1 | Ankyrin repeat domain-containing 42, parti         |
| LOD99_46    | 0.000085 | 21.9 | 0.3  | 1.3      | 8.2  | 0.3  | 5.1 | 1 | Inversin 2, partial                                |
| LOD99_7189  | 0.00009  | 21.9 | 0    | 2        | 7.6  | 0    | 5.2 | 1 | Ankyrin repeat protein                             |
| LOD99_3598  | 0.00011  | 21.5 | 0.1  | 0.52     | 9.5  | 0.1  | 2.9 | 2 | Ankyrin repeat domain-containing 39-like           |
| LOD99_12649 | 0.00012  | 21.5 | 0    | 0.014    | 14.6 | 0    | 2.8 | 1 | Tankyrase-2-like, partial                          |
| LOD99_660   | 0.00013  | 21.3 | 1    | 0.29     | 10.3 | 0.1  | 3.1 | 2 | Oxysterol-binding protein-related protein          |
| LOD99_15033 | 0.00015  | 21.1 | 5.6  | 1.5      | 8    | 0.6  | 6   | 3 | Ankyrin repeat protein                             |
| LOD99_14405 | 0.00017  | 21   | 0.7  | 0.16     | 11.2 | 0.6  | 3.7 | 1 | B-cell lymphoma 3                                  |
| LOD99_13869 | 0.00023  | 20.5 | 0    | 0.11     | 11.7 | 0    | 3.5 | 2 | Fibronectin type 3 ankyrin repeat domains prot     |
| LOD99_12878 | 0.00024  | 20.5 | 0.4  | 5.8      | 6    | 0.1  | 5.2 | 3 | Leucine-rich repeat serine/threonine-protein       |
| LOD99_12278 | 0.00027  | 20.3 | 0    | 0.031    | 13.5 | 0    | 2.6 | 2 | Cortactin-binding protein 2-like                   |
| LOD99_4487  | 0.00029  | 20.2 | 0.2  | 1.2      | 8.3  | 0    | 4.5 | 2 | Ankyrin repeat and domain-containing prote         |
| LOD99_8148  | 0.00078  | 18.8 | 0    | 0.0024   | 17.2 | 0    | 1.9 | 1 | Ankyrin repeat and alpha motif domain-cont         |
| LOD99_4375  | 0.0011   | 18.3 | 3.6  | 0.071    | 12.3 | 1.4  | 3.8 | 2 | Ankyrin-3                                          |
| LOD99_15420 | 0.0012   | 18.2 | 0.3  | 0.44     | 9.7  | 0.2  | 3.3 | 1 | Caskin-2                                           |
| LOD99_4987  | 0.0012   | 18.2 | 0    | 1.7      | 7.8  | 0    | 4   | 2 | FEM-1                                              |
| LOD99_10116 | 0.0012   | 18.1 | 0.5  | 1.3      | 8.1  | 0.1  | 4.4 | 2 | Espin-like                                         |
| LOD99_6090  | 0.0015   | 17.9 | 0.1  | 0.26     | 10.5 | 0.2  | 2.4 | 1 | A Designed Ankyrin Protein With Four Identi        |
| LOD99_1317  | 0.0016   | 17.7 | 0    | 0.2      | 10.9 | 0    | 2.2 | 1 | Integrin-linked protein kinase-like X2             |
| LOD99_15047 | 0.0017   | 17.7 | 0    | 0.22     | 10.7 | 0    | 2.4 | 1 | Ankyrin repeat protein                             |
| LOD99_6550  | 0.0019   | 17.5 | 1    | 0.37     | 10   | 0.2  | 3   | 1 | S-adenosyl-L-methionine-dependent tRNA 4-demethylw |
| LOD99_11432 | 0.002    | 17.4 | 0    | 0.023    | 14   | 0    | 2.3 | 1 | Espin-like                                         |
| LOD99_2666  | 0.0035   | 16.6 | 0.1  | 5.4      | 6.1  | 0.1  | 4.1 | 2 | Espin-like                                         |
| LOD99_7008  | 0.0047   | 16.2 | 0.1  | 0.57     | 9.4  | 0.1  | 2.4 | 1 | NF-kappa-B inhibitor delta                         |
| LOD99_6688  | 0.0049   | 16.2 | 0    | 0.55     | 9.4  | 0    | 2.8 | 2 | Espin-like                                         |
| LOD99_12564 | 0.0053   | 16   | 0.1  | 0.21     | 10.8 | 0.1  | 2.5 | 1 | Ankyrin repeat domain-containing 49-like           |
| LOD99_11885 | 0.0073   | 15.6 | 0.1  | 0.27     | 10.4 | 0    | 2.5 | 2 | Feminization-1b                                    |
| LOD99_12649 | 0.0076   | 15.5 | 0    | 0.27     | 10.4 | 0    | 3.1 | 1 | Leucine-rich repeat serine/threonine-protein       |
| LOD99_4518  | 0.0095   | 15.2 | 0.4  | 0.7      | 9.1  | 0.4  | 2.9 | 1 | Protein phosphatase 1 subunit 12A-like             |

 present  
 considered absent

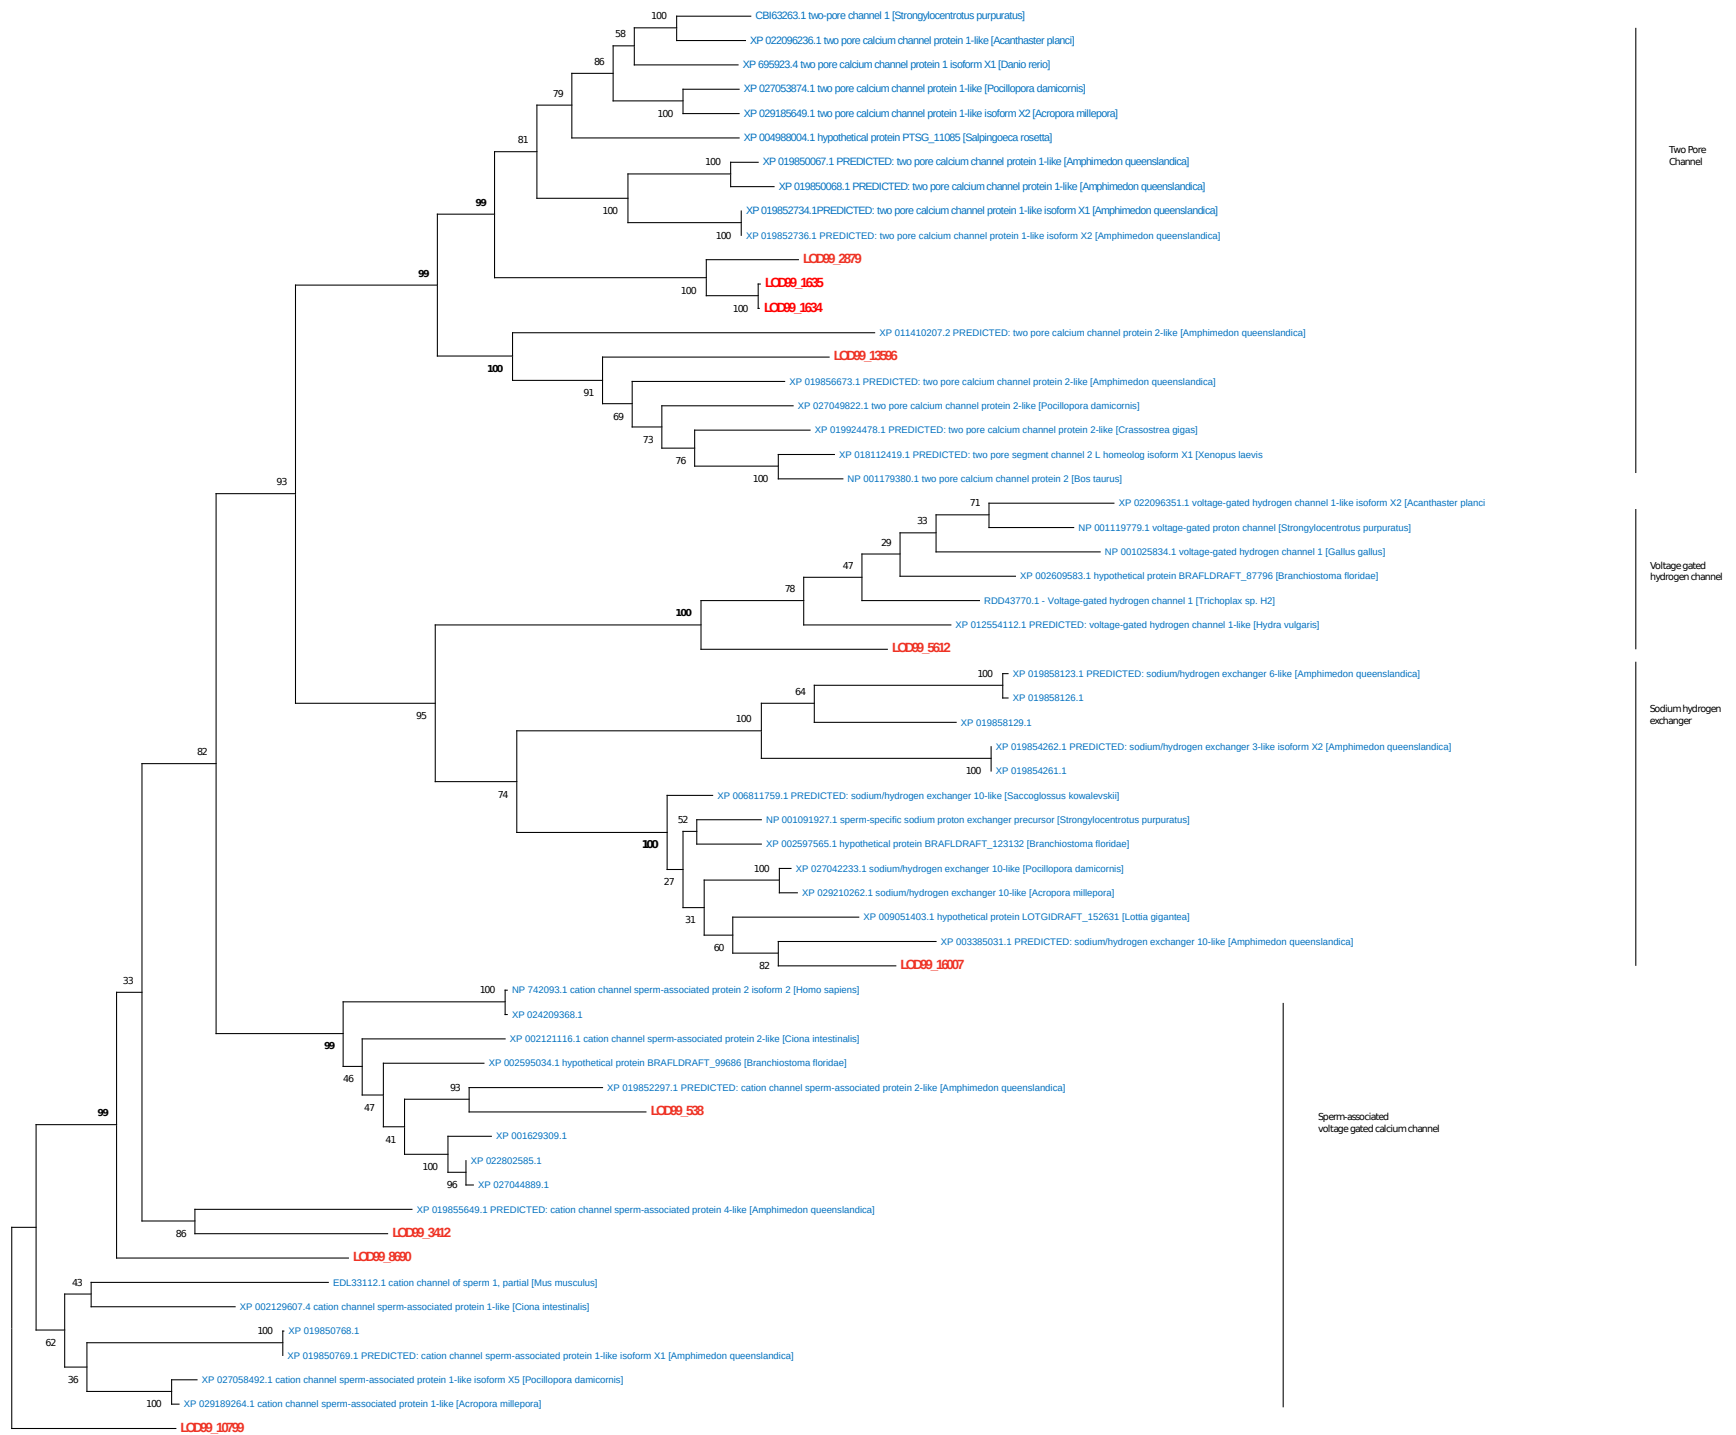

**Figure S12: Diversity and phylogenetic positions of *Ooopsacas* voltage-gated ion channels.**

The alignment was constructed using MAFFT (Katoh et al, 2002), trimmed with trimAL (Capella-Gutierrez et al. 2009). Phylogenetic trees were constructed using PhyML (Guindon et al. 2010) with the Smart Model Selection (Lefort et al., 2017), then viewed with MEGA (Kumar et al 2018). The multiple alignment is available at [https://zenodo.org/communities/oops\\_13](https://zenodo.org/communities/oops_13).

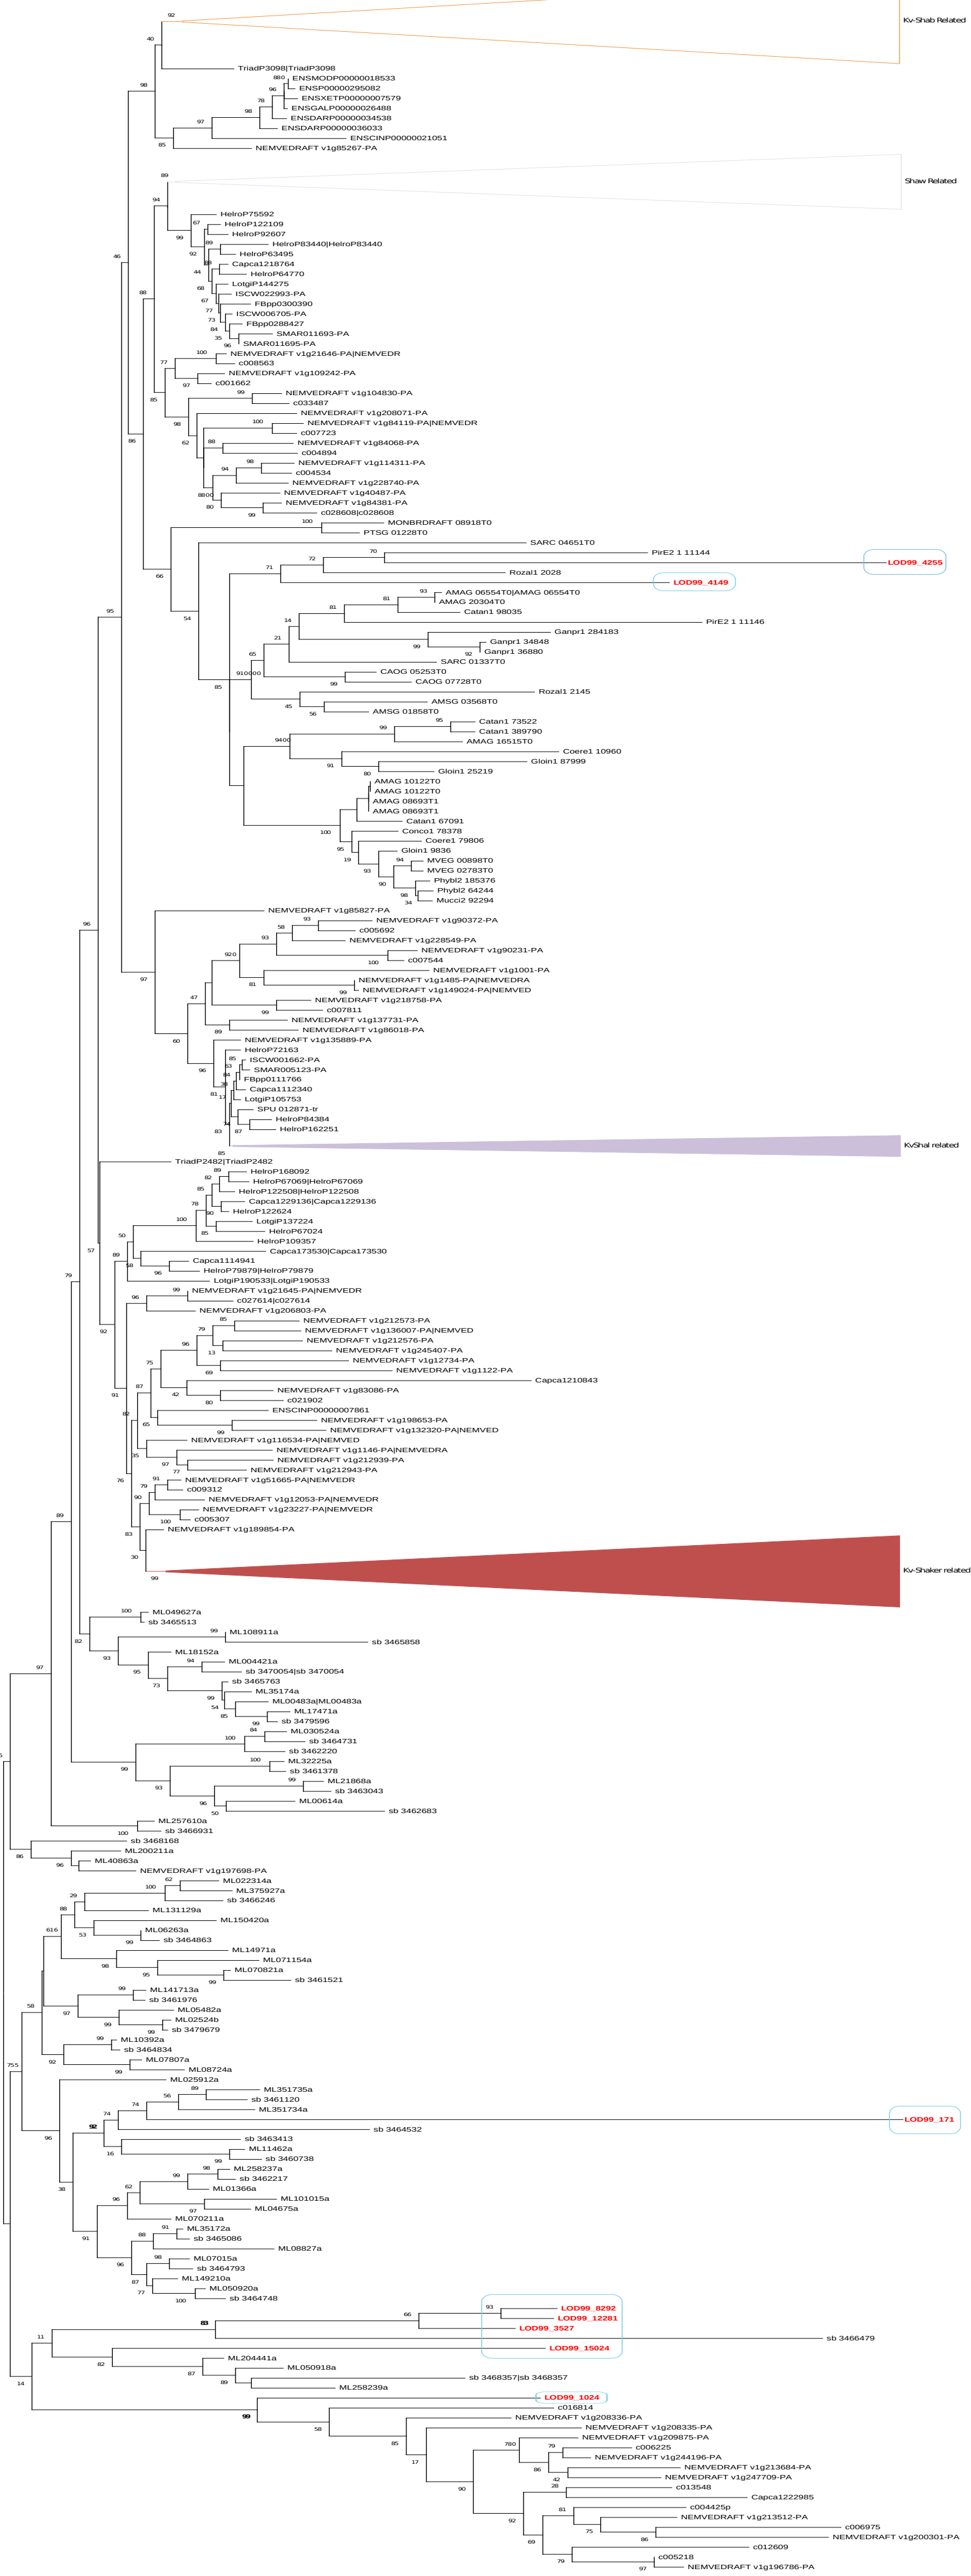

**Figure S13: Phylogenetic positions of *Opsacis* potassium channels (red), confirming that they are not related to voltage gated channels.** The alignment was performed using MAFFT and trimmed using trimAL, it is available publicly at [https://zenodo.org/communities/oops\\_13](https://zenodo.org/communities/oops_13). The phylogenetic analysis was performed with PhyML (Smart Model Selection). Bootstrap support (1000 iterations) values are written at each node.

**Table S18: Blast P search of proteins involved in bilaterian synapses against the predicted proteome of *O. minuta* and reverse blast best hits against NCBI human NR and general NR databases.**

| Searched proteins  |                           | Blast P against <i>O. minuta</i> predicted proteome |                                                                                                       |                                                                                                                             |                                                                                                               | Reciprocal best hits against human NR |                   | Reciprocal best hits against NR                                                                  |                                                                                                                                                            |                                                                           |                |           |
|--------------------|---------------------------|-----------------------------------------------------|-------------------------------------------------------------------------------------------------------|-----------------------------------------------------------------------------------------------------------------------------|---------------------------------------------------------------------------------------------------------------|---------------------------------------|-------------------|--------------------------------------------------------------------------------------------------|------------------------------------------------------------------------------------------------------------------------------------------------------------|---------------------------------------------------------------------------|----------------|-----------|
| Category           | protein name              | NCBI ID                                             | description                                                                                           | hits                                                                                                                        | support                                                                                                       | Human hit rev                         | Human hit name    | First rev blast hit (all species)                                                                | NCBI gene                                                                                                                                                  | e value E                                                                 |                |           |
| Category           | protein name              | NCBI ID                                             | description                                                                                           | locus tag                                                                                                                   | e value                                                                                                       | bits (e-c)                            | blast             | e value E                                                                                        | Human hit name                                                                                                                                             | First rev blast hit (all species)                                         | NCBI gene      | e value E |
| Pre-synaptic genes | <b>BRAC1</b>              | NP_02344572.1                                       | drial homolog subfamily C member 5 [Macaca mulatta]                                                   | LD099_4857<br>LD099_14882<br>LD099_2992                                                                                     | 9.42E-37<br>5.50E-22<br>4.05E-18                                                                              | 71.14                                 | 21 NP_001383911.1 | 37 drial homolog subfamily C member 5B [Homo sapiens]                                            |                                                                                                                                                            | drial homolog subfamily C member 5 like isoform 1 [Prochorella flammarum] | XP_027058181.1 | 0         |
|                    | <b>Epsin1_Homo</b>        | NP_017465.2                                         | epsin-1 isoform c [Homo sapiens]                                                                      | LD099_1145<br>LD099_2284                                                                                                    | 9.30E-66<br>7.31E-43                                                                                          | 2                                     | AAH93972.1        | 72 Epsin 2 [Homo sapiens]                                                                        | hypothetical protein: BRAF_LDKRAFT_200079 [Branchiostoma floridae]                                                                                         | XP_00299355.1                                                             | -74            |           |
|                    | <b>Neurexin</b>           | NP_004792.1                                         | Neurexin isoform1                                                                                     | LD099_2715                                                                                                                  | 9.86E-19                                                                                                      | 5                                     | NP_001181272.1    | -74 protein eyes shut homolog isoform 1 precursor [Homo sapiens]                                 | PREDICTED: neuregulin locus notch homolog protein 1-like [Saccolossus kowalevskii]                                                                         | XP_000823081.1                                                            | -125           |           |
|                    | <b>Parkin</b>             | NP_001180512.1                                      | protein kinase C and casein kinase substrate in neurons protein 1 [Homo sapiens]                      | LD099_3417<br>LD099_3047<br>LD099_210<br>LD099_9297                                                                         | 7.02E-46<br>2.72E-18<br>6.37E-10<br>3.16E-07                                                                  | 4                                     | NP_001171900.1    | 45 protein kinase C and casein kinase substrate in neurons protein 2 isoform B [Homo sapiens]    | PREDICTED: protein kinase C and casein kinase substrate in neurons protein 2-like [Orbicella faveolata]                                                    | XP_020620621.1                                                            | -58            |           |
|                    | <b>Piccolo</b>            | NP_149015.2                                         | protein piccolo isoform 1 [Homo sapiens]                                                              | LD099_15363<br>LD099_7194<br>LD099_12634<br>LD099_19                                                                        | 1.07E-09<br>2.65E-08<br>3.48E-06<br>3.49E-06                                                                  | 4                                     | BAG65229.1        | 0 unnamed protein product [Homo sapiens]                                                         | PREDICTED: E3 ubiquitin-protein ligase NEED4-like isoform X2 [Xenopus laevis]<br>protein kinase C<br>centrosomal protein<br>Delta                          | XP_018110948.1                                                            | 0              |           |
|                    | <b>Profilin</b>           | EW478854.1                                          | profilin 2, isoform CRA_c [Homo sapiens]                                                              | Not present                                                                                                                 |                                                                                                               |                                       |                   |                                                                                                  |                                                                                                                                                            |                                                                           |                |           |
|                    | <b>SCAM</b>               | NP_056433.2                                         | membrane-associated guanylate kinase, WW and PDZ domain-containing protein 2 isoform 1 [Homo sapiens] | LD099_10336                                                                                                                 | 2.39E-50                                                                                                      | 1                                     | AUK13844.1        | 55 MAGI-1b [Homo sapiens]                                                                        | PREDICTED: cysteine proteinase 1-like isoform X1 [Amphimedon queenslandica]                                                                                | XP_003386471.1                                                            | -115           |           |
|                    | <b>SNAP29</b>             | NP_004773.1                                         | synaptosomal associated protein 29 [Homo sapiens]                                                     | LD099_1179                                                                                                                  | 2.79E-10                                                                                                      | 1                                     | BAD97337.1        | 15 synaptosomal-associated protein 29 isoform SNAP29B variant [Homo sapiens]                     | PREDICTED: synaptosomal-associated protein 29-like [Hydra vulgaris]                                                                                        | XP_002155969.1                                                            | -17            |           |
|                    | <b>Syntaxin</b>           | NP_006642.1                                         | complexin-1 [Homo sapiens]                                                                            | Not found                                                                                                                   | 0.34                                                                                                          | 0                                     |                   |                                                                                                  |                                                                                                                                                            |                                                                           |                |           |
|                    | <b>Syntaxin3</b>          | NP_005046.1                                         | vesicle-associated membrane protein 1 isoform 1 [Homo sapiens]                                        | LD099_4446<br>LD099_3822                                                                                                    | 4.40E-19<br>2.28E-11                                                                                          | 2                                     | NP_005046.1       | 19 vesicle-associated membrane protein 1 isoform 1 [Homo sapiens]                                | vesicle-associated membrane protein 2-like [Melanaphis sacchari]                                                                                           | XP_025199128.1                                                            | -24            |           |
|                    | <b>Syntaxin4</b>          | CA0322.1                                            | syntaxin 4 [Homo sapiens]                                                                             | LD099_1009<br>LD099_1011<br>LD099_5796                                                                                      | 1.88E-29<br>1.86E-18<br>2.00E-10                                                                              | 3                                     | no hits           |                                                                                                  | Syntaxin 3-like isoform 1<br>Syntaxin 3-like<br>Transmembrane channel-like protein 7                                                                       |                                                                           |                |           |
|                    | <b>Syntaxin5</b>          | NP_008866.3                                         | syntaxin 5 isoform a [Homo sapiens]                                                                   | LD099_2854<br>LD099_13134<br>LD099_13466<br>LD099_4796<br>LD099_4425<br>LD099_288<br>LD099_15421<br>LD099_2270              | 0<br>3.76E-58<br>2.08E-47<br>6.55E-47<br>2.11E-44<br>5.97E-39<br>1.02E-24<br>1.60E-19                         | 8                                     | XP_016883888.1    | 0 syntaxin 5 isoform X1 [Homo sapiens]                                                           | PREDICTED: syntaxin 5 isoform X1 [Neolis carolinensis]<br>phosphatidylinositol-3-phosphatase SAC1                                                          | XP_008105797.1                                                            | 0              |           |
|                    | <b>Syntaxin6</b>          | NP_063243.1                                         | syntaxin 6 isoform 2 precursor [Homo sapiens]                                                         | LD099_2700                                                                                                                  | 2.12E-07                                                                                                      | 1                                     | no hits           |                                                                                                  | PREDICTED: syntaxin 6-like protein 1 [Amphimedon queenslandica]                                                                                            | XP_003384953.1                                                            | -32            |           |
|                    | <b>Syntaxin7</b>          | NP_001129277.1                                      | syntaxin 7 isoform 1 [Homo sapiens]                                                                   | LD099_12634<br>LD099_15776<br>LD099_10127<br>LD099_4460<br>LD099_7374<br>LD099_5855<br>LD099_6604                           | 2.24E-11<br>5.78E-11<br>6.07E-11<br>1.27E-10<br>1.46E-10<br>1.33E-08<br>1.97E-08                              | 13                                    | XP_005271958.1    | 89 centrosomal protein of 120 kDa isoform X3 [Homo sapiens]                                      | centrosomal protein<br>Copine 8<br>mGAP-activating like protein 1<br>PEC-alpha-beta-gamma<br>protein kinase C<br>Copine 9<br>BA1-associated protein 3-like | XP_0061629704.1                                                           | -96            |           |
|                    | <b>Syntaxin8</b>          | NP_004954.1                                         | syntaxin-1A isoform 1 [Homo sapiens]                                                                  | LD099_15483<br>LD099_3843<br>LD099_13884<br>LD099_13883<br>LD099_14031<br>LD099_7707                                        | 7.42E-47<br>5.99E-41<br>2.25E-09<br>2.32E-08<br>1.89E-07<br>2.64E-06                                          | 6                                     | AAA420940.1       | 52 syntaxin [Homo sapiens]                                                                       | PREDICTED: syntaxin-like isoform X8 [Branchiostoma belcheri]                                                                                               | XP_019641353.1                                                            | -54            |           |
| Postsynaptic genes | <b>Classical cadherin</b> | NP_001783.2                                         | cadherin-2 isoform 1 (synproteob) [Homo sapiens]                                                      | LD099_13082<br>LD099_8123<br>LD099_15964<br>LD099_7816<br>LD099_14941<br>LD099_10096                                        | 2.16E-32 many<br>2.32E-31<br>5.69E-31<br>4.42E-27<br>5.14E-27<br>2.08E-26                                     |                                       | NP_001278214.1    | 0 protocadherin Fat 4 isoform 2 precursor [Homo sapiens]                                         | PREDICTED: protocadherin Fat 4-like [Sinycyochelus rhinocerous]                                                                                            | XP_026579462.1                                                            | 0              |           |
|                    | <b>CASK</b>               | NP_003679.2                                         | peripheral plasma membrane protein CASK isoform 1 [Homo sapiens]                                      | LD099_2822<br>LD099_6818<br>LD099_4632<br>LD099_15011<br>LD099_6486                                                         | 6.06E-76 many<br>2.12E-75<br>3.80E-61<br>3.58E-54<br>1.26E-48                                                 |                                       | XP_007144931.1    | 149 calcium/calmodulin-dependent protein kinase type II subunit delta isoform X12 [Homo sapiens] | calcium/calmodulin-dependent protein kinase type II delta chain isoform X16 [Astatotilapia calliptera]                                                     | XP_02015572.1                                                             | -148           |           |
|                    | <b>ERBB-R</b>             | NP_00246434.1                                       | receptor tyrosine-protein kinase erbB-4 isoform X8 [Homo sapiens]                                     | LD099_12748<br>LD099_5423<br>LD099_7159<br>LD099_428<br>LD099_13894<br>LD099_9475<br>LD099_14066<br>LD099_3486<br>LD099_428 | 1.07E-72 many<br>3.43E-58<br>1.82E-55<br>2.01E-53<br>3.55E-53<br>1.26E-52<br>1.27E-52<br>2.46E-52<br>4.40E-51 |                                       | XP_016859071.1    | 79 receptor tyrosine-protein kinase erbB-4 isoform X9 [Homo sapiens]                             | epidermal growth factor receptor isoform X1 [Diachasma alboum]                                                                                             | XP_015119610.1                                                            | -89            |           |
|                    | <b>DLGAP</b>              | NP_004737.2                                         | disk large-associated protein 1 isoform 1 [Homo sapiens]                                              | LD099_4955<br>LD099_13058                                                                                                   | 1.56E-06<br>5.42E-06                                                                                          | 2                                     | BAH41025.1        | 6 unnamed protein product [Homo sapiens]                                                         | disk large-associated protein 1 isoform X1 [Chelonia mydas]                                                                                                | XP_007063949.1                                                            | -4             |           |
|                    | <b>GRIP</b>               | AA115394.1                                          | Glutamate receptor interacting protein 1 [Homo sapiens]                                               | LD099_10157<br>LD099_10153<br>LD099_3007<br>LD099_13080<br>LD099_13510<br>LD099_2980<br>LD099_15816                         | 4.42E-32 many<br>8.40E-26<br>3.94E-19<br>1.19E-16<br>9.41E-16<br>2.16E-33<br>2.57E-33                         |                                       | XP_011512444.1    | 34 glutamate receptor-interacting protein 2 isoform X2 [Homo sapiens]                            | Glutamate receptor-interacting protein 1 [Stegodyphus mimosanum]                                                                                           | KFM63452.1                                                                | -40            |           |
|                    | <b>GABA-R</b>             | NP_001461.1                                         | gamma-aminobutyric acid type B receptor subunit 1 isoform a precursor [Homo sapiens]                  | LD099_2448<br>LD099_3013<br>LD099_3007<br>LD099_13080<br>LD099_13510<br>LD099_2980<br>LD099_15816                           | 6.65E-51<br>2.61E-48<br>3.62E-47<br>2.88E-46<br>4.88E-39<br>2.16E-33<br>2.57E-33                              | 23                                    | XP_011512755.1    | 49 gamma-aminobutyric acid type B receptor subunit 1 isoform X3 [Homo sapiens]                   | gamma-aminobutyric acid type B receptor subunit 1 [Drosophila willistonii]                                                                                 | XP_023021901.1                                                            | -61            |           |
|                    | <b>Homer</b>              | NP_004263.1                                         | homer protein homolog 1 isoform 1 [Homo sapiens]                                                      | LD099_175<br>LD099_14132                                                                                                    | 1.56E-52<br>6.02E-08                                                                                          | 2                                     | AAH47438.1        | 53 Homer homolog 1 [Drosophila] [Homo sapiens]                                                   | putative homer protein-like 2 isoform X2 [Apostichopus japonicus]                                                                                          | PIK37620.1                                                                | -69            |           |
|                    | <b>Cholinesterase</b>     | NP_001352858.1                                      | neurologin-1 isoform 3 [Homo sapiens]                                                                 | LD099_9823<br>LD099_15812<br>LD099_15043<br>LD099_6638<br>LD099_8622                                                        | 1.89E-41<br>1.96E-40<br>6.52E-35<br>1.26E-33<br>3.90E-33                                                      | 5                                     | GIEM_A            | 56 Chain A, Cholinesterase [Homo sapiens]                                                        | putative cholinesterase [Heterostelium album PH500]                                                                                                        | XP_020423563.1                                                            | -92            |           |
|                    | <b>Alpha catenin</b>      | NP_001310911.1                                      | catenin alpha-1 isoform 1 [Homo sapiens]                                                              | LD099_9843<br>LD099_722<br>LD099_6852                                                                                       | 9.22E-53<br>1.21E-24<br>4.23E-20                                                                              | 3                                     | NP_001269527.1    | 63 catenin alpha 2 isoform 4 [Homo sapiens]                                                      | alpha catenin [Dopisacac minuta]<br>Vinculin                                                                                                               | AIW485906.1                                                               | 0              |           |
|                    | <b>Beta catenin</b>       | NP_001091679.1                                      | catenin beta-1 isoform 1 [Homo sapiens]                                                               | LD099_2816                                                                                                                  | 3.66E-15                                                                                                      |                                       | NP_001317658.1    | 115 catenin beta-1 isoform 2 [Homo sapiens]                                                      | Beta catenin [Dopisacac minuta]                                                                                                                            | AF280422.1                                                                | 0              |           |

present  
considered absent  
unclear

**Table S19: Results of HMMER searches for SNARES proteins** present in the predicted proteome of *O. minuta* followed by a reciprocal blast best hit approach evidencing several syntaxins and SNAP proteins.

To perform this search 4 distinct HMMER profiles were built and used: one on human sequences only, and three others, each focused on a subfamily (Qa, Qb and Qc) gathering sequences of species representative of the main metazoan taxa: Vertebrata (*Homo sapiens*, *Neophocaena asiaeorientalis*, *Carassius auratus*, *Python bivittatus*, *Microcebus murinus*, *Cynoglossus semilaevis*, *Xenopus laevis*, *Astyanax mexicanus*), Cephalorhordata (*Branchiostoma belcheri*), Arthropoda (*Centruroides sculpturatus*, *Caligus rogercresseyi*), Nematoda (*Loa loa*), Mollusca (*Octopus bimaculoides*), Cnidaria (*Hydra vulgaris*, *Acropora millepora*, *Stylophora pistillata*), Placozoa (*Trichoplax sp.*), Porifera (*Amphimedon queenslandica*); and the Alveolata *Trypanosoma brucei*. The four sequence datasets used to build each HMMER profile are available at [https://zenodo.org/communities/loops\\_13](https://zenodo.org/communities/loops_13).

| RESULTS OF HMMER SEARCH |                         |                                                    |                                                    | RECIPROCAL BLAST P ON NCBI NR DATABASE: Best hits                                           |                                                                                             |                     |
|-------------------------|-------------------------|----------------------------------------------------|----------------------------------------------------|---------------------------------------------------------------------------------------------|---------------------------------------------------------------------------------------------|---------------------|
| HMMER profile Query     | E-value (Full Sequence) | <i>Oopsacas</i> locus tag                          | <i>Oopsacas</i> gene Description                   | E-value                                                                                     | description                                                                                 | accession number ID |
| human SNARES            | 2.00E-10                | LOD99_12684                                        | Hypothetical protein                               | 3.00E-58                                                                                    | syntaxin-16 isoform d [Homo sapiens]                                                        | NP_001128245.1      |
|                         | 8.30E-06                | LOD99_3843                                         | Syntaxin-3                                         | 4.00E-47                                                                                    | syntaxin-1B isoform X1 [Homo sapiens]                                                       | XP_016878382.1      |
|                         | 0.001                   | LOD99_15683                                        | Syntaxin-1A isoform X3                             | 1.00E-52                                                                                    | syntaxin [Homo sapiens]                                                                     | AAA20940.1          |
|                         | 0.006                   | LOD99_2734                                         | Hypothetical protein                               | 2.00E-08                                                                                    | Chain B, BACULOVIRAL IAP REPEAT-CONTAINING PROTEIN 7 [Homo sapiens]                         | 4AUQ_B              |
|                         | 0.0094                  | LOD99_8299                                         | Hypothetical protein                               | -                                                                                           | no hit                                                                                      | -                   |
| Qa-SNARES               | 1.10E-57                | LOD99_12684                                        | Hypothetical protein                               | 3.00E-58                                                                                    | syntaxin-16 isoform d [Homo sapiens]                                                        | NP_001128245.1      |
|                         | 6.50E-54                | LOD99_632                                          | Hypothetical protein                               | 4.00E-77                                                                                    | Syntaxin-5 [Trichoplax sp. H2]                                                              | RDD42967.1          |
|                         | 1.10E-45                | LOD99_3843                                         | Syntaxin-3                                         | 6.00E-50                                                                                    | syntaxin-1A-like isoform X1 [Acropora millepora]                                            | XP_029194329.1      |
|                         | 1.30E-40                | LOD99_15683                                        | Syntaxin-1A isoform X3                             | 5.00E-54                                                                                    | PREDICTED: syntaxin-like isoform X8 [Branchiostoma belcheri]                                | XP_019641353.1      |
|                         | 2.70E-36                | LOD99_13883                                        | Syntaxin-7                                         | 3.00E-41                                                                                    | syntaxin-7 isoform X2 [Neophocaena asiaeorientalis]                                         | XP_024614921.1      |
|                         | 8.70E-25                | LOD99_14031                                        | Syntaxin-12                                        | 2.00E-12                                                                                    | syntaxin-7-like [Carassius auratus]                                                         | XP_026146358.1      |
|                         | 6.80E-23                | LOD99_1731                                         | Syntaxin-18 isoform X2                             | 2.00E-23                                                                                    | syntaxin-18 [Python bivittatus]                                                             | XP_007437315.2      |
|                         | 3.70E-08                | LOD99_11618                                        | Hypothetical protein                               | 6.00E-19                                                                                    | syntaxin-17 [Microcebus murinus]                                                            | XP_012624451.1      |
|                         | 2.60E-05                | LOD99_12196                                        | Syntaxin-6-like isoform X2                         | 5.00E-26                                                                                    | PREDICTED: syntaxin-6-like isoform X2 [Octopus bimaculoides]                                | XP_014784937.1      |
|                         | 0.0005                  | LOD99_7767                                         | Hypothetical protein                               | -                                                                                           | no hit                                                                                      | -                   |
| 0.0016                  | LOD99_9730              | Hypothetical protein                               | 2.00E-12                                           | vesicular membrane trafficking protein p18 [Loa loa]                                        | XP_020304007.1                                                                              |                     |
| 0.0096                  | LOD99_6844              | BET1-like protein                                  | 2.00E-15                                           | BET1-like protein [Cynoglossus semilaevis]                                                  | XP_024911915.1                                                                              |                     |
| Qb-SNARES               | 1.10E-38                | LOD99_4126                                         | Hypothetical protein                               | 1.00E-49                                                                                    | Golgi SNAP receptor complex member 1 [Trichoplax sp. H2]                                    | RDD46535.1          |
|                         | 1.10E-33                | LOD99_4578                                         | Vesicle transport through interaction with t-SNARE | 7.00E-38                                                                                    | vesicle transport through interaction with t-SNARES homolog 1A-like [Stylophora pistillata] | XP_022809715.1      |
|                         | 8.20E-18                | LOD99_2115                                         | Vesicle transport protein SEC20                    | 5.00E-05                                                                                    | vesicle transport protein SEC20-like [Centruroides sculpturatus]                            | XP_023213355.1      |
|                         | 7.20E-13                | LOD99_2350                                         | Golgi SNAP receptor complex member                 | 6.00E-11                                                                                    | Golgi SNAP receptor complex member 2 [Caligus rogercresseyi]                                | ACO10315.1          |
|                         | 6.50E-09                | LOD99_1179                                         | Synaptosomal-associated protein 29-like            | 2.00E-17                                                                                    | PREDICTED: synaptosomal-associated protein 29-like [Hydra vulgaris]                         | XP_002155969.1      |
|                         | 2.30E-08                | LOD99_9724                                         | Synaptosomal-associated protein 25-A-like          | 9.00E-46                                                                                    | PREDICTED: synaptosomal-associated protein 25-A-like [Amphimedon queenslandica]             | XP_003388483.1      |
|                         | 1.00E-05                | LOD99_12196                                        | Syntaxin-6-like isoform X2                         | 5.00E-26                                                                                    | PREDICTED: syntaxin-6-like isoform X2 [Octopus bimaculoides]                                | XP_014784937.1      |
|                         | 2.00E-05                | LOD99_9730                                         | Hypothetical protein                               | 2.00E-12                                                                                    | vesicular membrane trafficking protein p18 [Loa loa]                                        | XP_020304007.1      |
|                         | 0.0022                  | LOD99_12863                                        | Biogenesis of lysosome-related organelles complex  | 5.00E-20                                                                                    | biogenesis of lysosome-related organelles complex 1 subunit 6 [Astyanax mexicanus]          | XP_022542735.1      |
|                         | 0.0036                  | LOD99_632                                          | Hypothetical protein                               | 4.00E-77                                                                                    | Syntaxin-5 [Trichoplax sp. H2]                                                              | RDD42967.1          |
| Qc-SNARES               | 1.10E-34                | LOD99_12196                                        | Syntaxin-6-like isoform X2                         | 5.00E-26                                                                                    | PREDICTED: syntaxin-6-like isoform X2 [Octopus bimaculoides]                                | XP_014784937.1      |
|                         | 1.60E-20                | LOD99_12198                                        | MGC78971 protein                                   | 2.00E-26                                                                                    | MGC78971 protein [Xenopus laevis]                                                           | AAI08777.1          |
|                         | 5.90E-19                | LOD99_9730                                         | Hypothetical protein                               | 2.00E-12                                                                                    | vesicular membrane trafficking protein p18 [Loa loa]                                        | XP_020304007.1      |
|                         | 1.00E-10                | LOD99_13883                                        | Syntaxin-7                                         | 3.00E-41                                                                                    | syntaxin-7 isoform X2 [Neophocaena asiaeorientalis]                                         | XP_024614921.1      |
|                         | 1.30E-10                | LOD99_16136                                        | Poly(rC)-binding protein 2                         | 7.00E-23                                                                                    | heterogeneous nuclear ribonucleoprotein K-like [Acropora millepora]                         | XP_029186313.1      |
|                         | 4.90E-08                | LOD99_6844                                         | BET1-like protein                                  | 2.00E-15                                                                                    | BET1-like protein [Cynoglossus semilaevis]                                                  | XP_024911915.1      |
|                         | 3.00E-07                | LOD99_14031                                        | Syntaxin-12                                        | 2.00E-12                                                                                    | syntaxin-7-like [Carassius auratus]                                                         | XP_026146358.1      |
|                         | 1.50E-06                | LOD99_1179                                         | Synaptosomal-associated protein 29-like            | 2.00E-17                                                                                    | PREDICTED: synaptosomal-associated protein 29-like [Hydra vulgaris]                         | XP_002155969.1      |
|                         | 1.50E-06                | LOD99_632                                          | Hypothetical protein                               | 4.00E-77                                                                                    | Syntaxin-5 [Trichoplax sp. H2]                                                              | RDD42967.1          |
|                         | 2.70E-05                | LOD99_12684                                        | Hypothetical protein                               | 3.00E-58                                                                                    | syntaxin-16 isoform d [Homo sapiens]                                                        | NP_001128245.1      |
|                         | 0.00013                 | LOD99_9724                                         | Synaptosomal-associated protein 25-A-like          | 9.00E-46                                                                                    | PREDICTED: synaptosomal-associated protein 25-A-like [Amphimedon queenslandica]             | XP_003388483.1      |
|                         | 0.00014                 | LOD99_3843                                         | Syntaxin-3                                         | 6.00E-50                                                                                    | syntaxin-1A-like isoform X1 [Acropora millepora]                                            | XP_029194329.1      |
|                         | 0.00075                 | LOD99_8951                                         | Hypothetical protein                               | -                                                                                           | no hit                                                                                      | -                   |
| 0.0055                  | LOD99_4578              | Vesicle transport through interaction with t-SNARE | 7.00E-38                                           | vesicle transport through interaction with t-SNARES homolog 1A-like [Stylophora pistillata] | XP_022809715.1                                                                              |                     |



**Table S20: Blast P search of proteins involved in silica biogenesis against *Oopsacas* predicted proteome, and reverse blast (against NR) best hit identity.**

| BlastP against <i>O. minuta</i> predicted proteome |                                                                     |                     |                 |                           | Reverse Blast against NR                              |
|----------------------------------------------------|---------------------------------------------------------------------|---------------------|-----------------|---------------------------|-------------------------------------------------------|
| Name of protein searched                           | Query                                                               | Accession number/ID | Hit ID Oopsacas | evalue                    | best hit description/chosen annotation                |
| Silicatein                                         | silicatein-like protein [Aulosaccus sp. GV-2009]                    | ACU86972.1          | NONE            |                           |                                                       |
| Silintaphin                                        | silintaphin-1 [Suberites domuncula]                                 | CAP16640.1          | NONE            |                           |                                                       |
| galectin                                           | galectin [Suberites domuncula]                                      | CAD37940.1          | NONE            |                           |                                                       |
| Cathepsin L                                        | cathepsin L [Sympagella nux]                                        | Own contig          | LOD99_12702     | 2.52 × 10 <sup>-102</sup> | Cathepsin L                                           |
| Cathepsin L                                        | cathepsin L [Sympagella nux]                                        | Own contig          | LOD99_4353      | 2.18 × 10 <sup>-100</sup> | Cathepsin L                                           |
| Cathepsin L                                        | cathepsin L [Sympagella nux]                                        | Own contig          | LOD99_10364     | 5.08 × 10 <sup>-92</sup>  | Cathepsin L                                           |
| Cathepsin L                                        | cathepsin L [Sympagella nux]                                        | Own contig          | LOD99_11258     | 8.03 × 10 <sup>-85</sup>  | Cathepsin L                                           |
| Cathepsin L                                        | cathepsin L [Sympagella nux]                                        | Own contig          | LOD99_6637      | 3.02 × 10 <sup>-84</sup>  | Cathepsin L                                           |
| Cathepsin L                                        | cathepsin L [Sympagella nux]                                        | Own contig          | LOD99_6632      | 1.86 × 10 <sup>-81</sup>  | Cathepsin L                                           |
| Cathepsin L                                        | cathepsin L [Sympagella nux]                                        | Own contig          | LOD99_5135      | 4.93 × 10 <sup>-73</sup>  | Cathepsin L                                           |
| Cathepsin L                                        | cathepsin L [Sympagella nux]                                        | Own contig          | LOD99_7783      | 2.69 × 10 <sup>-72</sup>  | Cathepsin L                                           |
| Cathepsin L                                        | cathepsin L [Sympagella nux]                                        | Own contig          | LOD99_9107      | 1.42 × 10 <sup>-71</sup>  | Cathepsin L                                           |
| Cathepsin L                                        | cathepsin L [Sympagella nux]                                        | Own contig          | LOD99_29        | 3.92 × 10 <sup>-53</sup>  | Cathepsin L                                           |
| Cathepsin L                                        | cathepsin L [Sympagella nux]                                        | Own contig          | LOD99_14333     | 7.93 × 10 <sup>-51</sup>  | Cathepsin L                                           |
| Cathepsin L                                        | cathepsin L [Sympagella nux]                                        | Own contig          | LOD99_6910      | 1.12 × 10 <sup>-45</sup>  | Cathepsin L                                           |
| Cathepsin L                                        | cathepsin L [Sympagella nux]                                        | Own contig          | LOD99_16078     | 3.21 × 10 <sup>-54</sup>  | Cathepsin L                                           |
| Cathepsin B                                        | cathepsin B [Sympagella nux]                                        | Own contig          | LOD99_2071      | 3.21 × 10 <sup>-51</sup>  | Cathepsin B                                           |
| Cathepsin B                                        | cathepsin B [Sympagella nux]                                        | Own contig          | LOD99_8394      | 4.15 × 10 <sup>-100</sup> | Cathepsin B                                           |
| Cathepsin B                                        | cathepsin B [Sympagella nux]                                        | Own contig          | LOD99_6927      | 1.35 × 10 <sup>-64</sup>  | Cathepsin B                                           |
| Cathepsin B                                        | cathepsin B [Sympagella nux]                                        | Own contig          | LOD99_2671      | 1.34 × 10 <sup>-84</sup>  | Cathepsin B                                           |
| Cathepsin B                                        | cathepsin B [Sympagella nux]                                        | Own contig          | LOD99_3637      | 2.26 × 10 <sup>-100</sup> | Cathepsin B                                           |
| NBCSA cotransporter                                | natriumbicarbonate silicic acid cotransporter [Suberites domuncula] | CAF32326.1          | LOD99_7310      | 2.52 × 10 <sup>-144</sup> | anion exchange protein 2-like [Biomphalaria glabrata] |
| arsB transporter (LSI2)                            | PREDICTED: putative transporter arsB [Amphimedon queenslandica]     | XP_003386169.1      | LOD99_7531      | 2.76 × 10 <sup>-99</sup>  | arsB transporter                                      |
| arsB transporter (LSI2)                            | PREDICTED: putative transporter arsB [Amphimedon queenslandica]     | XP_003386169.1      | LOD99_12653     | 1.84 × 10 <sup>-94</sup>  | arsB transporter                                      |
| Glassin                                            | glassin, partial [Euplectella curvistellata]                        | BAS21353.1          | LOD99_3750      | 1.32 × 10 <sup>-54</sup>  | Glassin, partial                                      |
| Silicase                                           | CA_SubDo [Suberites domuncula]                                      | SFW10617.1          | LOD99_7560      | 2.57 × 10 <sup>-21</sup>  | Carbonic anhydrase 20                                 |
| Silicase                                           | CA_SubDo [Suberites domuncula]                                      | SFW10617.1          | LOD99_966       | 3.45 × 10 <sup>-18</sup>  | Carbonic anhydrase 1-like                             |
| Silicase                                           | CA_SubDo [Suberites domuncula]                                      | SFW10617.1          | LOD99_7562      | 1.96 × 10 <sup>-15</sup>  | Carbonic anhydrase 2-like                             |
| Silicase                                           | CA_SubDo [Suberites domuncula]                                      | SFW10617.1          | LOD99_7559      | 4.38 × 10 <sup>-12</sup>  | Alpha carbonic anhydrase 5                            |
| Ferretin                                           | ferretin [Amphimedon queenslandica]                                 | XP_019854974.1      | LOD99_6480      | 5.72 × 10 <sup>-70</sup>  | Ferretin                                              |
| Chitin synthase                                    | chitin synthase CHS5611, partial [Spongilla lacustris]              | AEI55441.1          | LOD99_13043     | 4.08 × 10 <sup>-100</sup> | Chitin synthase 6                                     |

**Table S21: List of sequences used for phylogenetic analyses of silicatein and cathepsin (Fig. 6)**The corresponding alignment (\*) is available at : [https://zenodo.org/communities/oops\\_13](https://zenodo.org/communities/oops_13)

| Sequence label                 | Protein     | Organism                                | Accession number                    |
|--------------------------------|-------------|-----------------------------------------|-------------------------------------|
| PfISI1                         | Silicatein  | <i>Petrosia ficiformis</i>              | sequence provided in the alignment* |
| AquSil                         | Silicatein  | <i>Amphimedon queenslandica</i>         | XP_003383103.1                      |
| PfISI2                         | Silicatein  | <i>Petrosia ficiformis</i>              | sequence provided in the alignment  |
| GcydoSil                       | Silicatein  | <i>Geodia cydonium</i>                  | CAM57981.1                          |
| TaurSiA                        | Silicatein  | <i>Tethya aurantium</i>                 | AAC23951.1                          |
| DjapoSil                       | Silicatein  | <i>Discodermia japonica</i>             | CY80151.1                           |
| HokaSil                        | Silicatein  | <i>Halichondria okadai</i>              | BAB86343.1                          |
| Cmey_Sil                       | Silicatein  | <i>Crateromorpha meyeri</i>             | CAP49202.2                          |
| Mchun_Sil                      | Silicatein  | <i>Monoraphis chuni</i>                 | CAZ04880.1                          |
| LbakSil                        | Silicatein  | <i>Lubomirskia baikalensis</i>          | CAH10753.1                          |
| PfISI4                         | Silicatein  | <i>Petrosia ficiformis</i>              | sequence provided in the alignment  |
| PfISI3                         | Silicatein  | <i>Petrosia ficiformis</i>              | sequence provided in the alignment  |
| EupleSil                       | Silicatein  | <i>Euplectella aspergillum</i>          | CY80150.1                           |
| Cnu_L1                         | Cathepsin L | <i>Chondrilla caribea</i>               | sequence provided in the alignment  |
| CnuL6                          | Cathepsin L | <i>Chondrilla caribea</i>               | sequence provided in the alignment  |
| CnuL5                          | Cathepsin L | <i>Chondrilla caribea</i>               | sequence provided in the alignment  |
| CnuL3                          | Cathepsin L | <i>Chondrilla caribea</i>               | sequence provided in the alignment  |
| CowCathL2                      | Cathepsin L | <i>Capsaspora owczarzacki</i>           | EFW46557.1                          |
| HvuCathL                       | Cathepsin L | <i>Hydra vulgaris</i>                   | AAO65603.1                          |
| Hyalonema_populiferum_CathL    | Cathepsin L | <i>Hyalonema populiferum</i>            | sequence provided in the alignment  |
| Sympagella_nux_CatL1           | Cathepsin L | <i>Sympagella nux</i>                   | sequence provided in the alignment  |
| Ircinia_fasciculata_L1         | Cathepsin L | <i>Ircinia fasciculata</i>              | sequence provided in the alignment  |
| Ircinia_fasciculata_L3         | Cathepsin L | <i>Ircinia fasciculata</i>              | sequence provided in the alignment  |
| AphisCatL                      | Cathepsin L | <i>Aphis gossypii</i>                   | CAD33266.1                          |
| Apis_mellifera_CatL            | Cathepsin L | <i>Apis mellifera</i>                   | XP_006557802.1                      |
| PfICatL3                       | Cathepsin L | <i>Petrosia ficiformis</i>              | sequence provided in the alignment  |
| CnuL8                          | Cathepsin L | <i>Chondrilla caribea</i>               | sequence provided in the alignment  |
| PfICatL2                       | Cathepsin L | <i>Petrosia ficiformis</i>              | sequence provided in the alignment  |
| PfICatL1                       | Cathepsin L | <i>Petrosia ficiformis</i>              | sequence provided in the alignment  |
| CcaCathL4                      | Cathepsin L | <i>Corticium candelabrum</i>            | sequence provided in the alignment  |
| CnuL4                          | Cathepsin L | <i>Chondrilla caribea</i>               | sequence provided in the alignment  |
| Ircinia_fasciculata_L2         | Cathepsin L | <i>Ircinia fasciculata</i>              | sequence provided in the alignment  |
| Amphimedon_queenslandica_CatL1 | Cathepsin L | <i>Amphimedon queenslandica</i>         | XP_003391202.1                      |
| Rossella_fibulata_CatL         | Cathepsin L | <i>Rossella fibulata</i>                | sequence provided in the alignment  |
| Sympagella_nux_CatL3_          | Cathepsin L | <i>Sympagella nux</i>                   | sequence provided in the alignment  |
| Icllg4353.t1                   | Cathepsin L | <i>Oopsacas minuta</i>                  | sequence provided in the alignment  |
| Icllg12702.t1                  | Cathepsin L | <i>Oopsacas minuta</i>                  | sequence provided in the alignment  |
| Hyalonema_populiferum_CatL1    | Cathepsin L | <i>Hyalonema populiferum</i>            | sequence provided in the alignment  |
| Pheronema_raphanus_CatL1       | Cathepsin L | <i>Pheronema raphanus</i>               | sequence provided in the alignment  |
| Icllg10364.t1                  | Cathepsin L | <i>Oopsacas minuta</i>                  | sequence provided in the alignment  |
| Aphrocallistes_vastus_Cathepsi | Cathepsin L | <i>Aphrocallistes vastus</i>            | sequence provided in the alignment  |
| Aphrocallistes_vastus_CatL4    | Cathepsin L | <i>Aphrocallistes vastus</i>            | sequence provided in the alignment  |
| Icllg11258.t1                  | Cathepsin L | <i>Oopsacas minuta</i>                  | sequence provided in the alignment  |
| Icllg6637.t1                   | Cathepsin L | <i>Oopsacas minuta</i>                  | sequence provided in the alignment  |
| Sycon_coactum_CatL1            | Cathepsin L | <i>Sycon coactum</i>                    | sequence provided in the alignment  |
| Sycon_coactum_CatL2            | Cathepsin L | <i>Sycon coactum</i>                    | sequence provided in the alignment  |
| Aulosac_CatL2_                 | Cathepsin L | <i>Aulosaccus sp.</i>                   | ACU86972.1                          |
| Aulosac_CatL1_ACU86972.1       | Cathepsin L | <i>Aulosaccus sp.</i>                   | ACU86973.1                          |
| Icllg7783.t1                   | Cathepsin L | <i>Oopsacas minuta</i>                  | sequence provided in the alignment  |
| Icllg9107.t1                   | Cathepsin L | <i>Oopsacas minuta</i>                  | sequence provided in the alignment  |
| Pheronema_raphanus_CatL        | Cathepsin L | <i>Pheronema raphanus</i>               | sequence provided in the alignment  |
| Icllg6632.t1                   | Cathepsin L | <i>Oopsacas minuta</i>                  | sequence provided in the alignment  |
| CnuL7                          | Cathepsin L | <i>Chondrilla caribea</i>               | sequence provided in the alignment  |
| PfICatL4                       | Cathepsin L | <i>Petrosia ficiformis</i>              | sequence provided in the alignment  |
| Bathy_sp_CatL2                 | Cathepsin L | <i>Bathydorus sp.</i>                   | ACU86975.1                          |
| Bathy_sp_CatL3                 | Cathepsin L | <i>Bathydorus sp.</i>                   | ACU86973.1                          |
| Icllg5135.t1                   | Cathepsin L | <i>Oopsacas minuta</i>                  | sequence provided in the alignment  |
| Icllg6910.t1                   | Cathepsin L | <i>Oopsacas minuta</i>                  | sequence provided in the alignment  |
| Icllg29.t1                     | Cathepsin L | <i>Oopsacas minuta</i>                  | sequence provided in the alignment  |
| CcaCatL1                       | Cathepsin L | <i>Corticium candelabrum</i>            | sequence provided in the alignment  |
| Icllg14333.t1                  | Cathepsin L | <i>Oopsacas minuta</i>                  | sequence provided in the alignment  |
| Icllg16078.t1                  | Cathepsin L | <i>Oopsacas minuta</i>                  | sequence provided in the alignment  |
| CcandeB                        | Cathepsin B | <i>Corticium candelabrum</i>            | sequence provided in the alignment  |
| PRefB1                         | Cathepsin B | <i>Petrosia ficiformis</i>              | sequence provided in the alignment  |
| AqueCatB                       | Cathepsin B | <i>Amphimedon queenslandica</i>         | XP_003388852.1                      |
| IfasCatB2                      | Cathepsin B | <i>Ircinia fasciculata</i>              | sequence provided in the alignment  |
| PseuCatB                       | Cathepsin B | <i>Pseudospongosorites suberitoides</i> | sequence provided in the alignment  |
| SdoCatB                        | Cathepsin B | <i>Suberites domuncula</i>              | CAH04630.1                          |
| NvecCatB                       | Cathepsin B | <i>Nematostella veclensis</i>           | EDO38122.1                          |
| CpicaCatB                      | Cathepsin B | <i>Cristaria plicata</i>                | AEF32260.1                          |
| PfuctCatB                      | Cathepsin B | <i>Pinctada fucata</i>                  | ADX32985.1                          |
| CteneCatB                      | Cathepsin B | <i>Capitella teleta</i>                 | ELT94358.1                          |
| MmusCatB                       | Cathepsin B | <i>Mus musculus</i>                     | AAA37375.1                          |
| TadhCatB                       | Cathepsin B | <i>Trichoplax adhaerens</i>             | EDV23587.1                          |
| SalpCatB                       | Cathepsin B | <i>Salpingoeca rosetta</i>              | EGD76061.1                          |
| MbreviCatB                     | Cathepsin B | <i>Monosiga brevicollis</i>             | EDQ84610.1                          |
| SlacuCatB                      | Cathepsin B | <i>Spongilla lacustris</i>              | sequence provided in the alignment  |
| SocCatB2                       | Cathepsin B | <i>Sycon coactum</i>                    | sequence provided in the alignment  |
| SocCatB3                       | Cathepsin B | <i>Sycon coactum</i>                    | sequence provided in the alignment  |
| LpannCatB                      | Cathepsin B | <i>Lithopennaeus vannamei</i>           | ADI80349.1                          |
| AvastCatB3                     | Cathepsin B | <i>Aphrocallistes vastus</i>            | sequence provided in the alignment  |
| AvastCatB4                     | Cathepsin B | <i>Aphrocallistes vastus</i>            | sequence provided in the alignment  |
| CmeyerCatB                     | Cathepsin B | <i>Crateromorpha meyeri</i>             | CAP17587.1                          |
| Icllg2671.t1                   | Cathepsin B | <i>Oopsacas minuta</i>                  | sequence provided in the alignment  |
| Icllg3637.t1                   | Cathepsin B | <i>Oopsacas minuta</i>                  | sequence provided in the alignment  |
| CnuCatB                        | Cathepsin B | <i>Chondrilla caribea</i>               | sequence provided in the alignment  |
| AvastCatB2                     | Cathepsin B | <i>Aphrocallistes vastus</i>            | sequence provided in the alignment  |
| Icllg6927.t1                   | Cathepsin B | <i>Oopsacas minuta</i>                  | sequence provided in the alignment  |
| AvastCatB1                     | Cathepsin B | <i>Aphrocallistes vastus</i>            | sequence provided in the alignment  |
| UmarCatB                       | Cathepsin B | <i>Uronema marinum</i>                  | AAR19103.1                          |
| SpurCatB                       | Cathepsin B | <i>Strongylocentrotus purpuratus</i>    | XP_003729132.1                      |
| HmagniCatB                     | Cathepsin B | <i>Hydra magnipapillata</i>             | XP_002166984.1                      |
| PeRefB2                        | Cathepsin B | <i>Petrosia ficiformis</i>              | sequence provided in the alignment  |
| CowarCatB                      | Cathepsin B | <i>Capsaspora owczarzacki</i>           | XP_004364814.1                      |
| Icllg8394.t1                   | Cathepsin B | <i>Oopsacas minuta</i>                  | sequence provided in the alignment  |
| Icllg2071.t1                   | Cathepsin B | <i>Oopsacas minuta</i>                  | sequence provided in the alignment  |
| IfasCatB1                      | Cathepsin B | <i>Ircinia fasciculata</i>              | sequence provided in the alignment  |

1. Larroux C, Luke GN, Koopman P, Rokhsar DS, Shimeld SM, Degnan BM. Genesis and expansion of metazoan transcription factor gene classes. *Mol Biol Evol.* 2008;25(5):980–96.
2. Schenkelaars Q, Pratloug M, Kodjabachian L, Fierro-Constain L, Vacelet J, Le Bivic A, et al. Animal multicellularity and polarity without Wnt signaling. *Sci Rep.* 2017;7(1):15383.
3. Yang M, Derbyshire MK, Yamashita RA, Marchler-Bauer A. NCBI's Conserved Domain Database and Tools for Protein Domain Analysis. *Curr Protoc Bioinformatics.* 2020;69(1):e90.
4. Johnson LS, Eddy SR, Portugaly E. Hidden Markov model speed heuristic and iterative HMM search procedure. *BMC Bioinformatics.* 2010;11:431.
5. Liebeskind BJ, Hillis DM, Zakon HH. Convergence of ion channel genome content in early animal evolution. *Proceedings of the National Academy of Sciences.* 2015;112(8):E846–51.
6. Duschene M, Leys S. Sequences used for building HMMER profiles to search for SNAREs proteins. Zenodo; 2023. <https://zenodo.org/record/7534968>.
7. Riesgo A. alignment of cathepsin and silicatein sequences. Zenodo; 2022. <https://zenodo.org/record/7534980>.
8. Guindon S, Dufayard JF, Lefort V, Anisimova M, Hordijk W, Gascuel O. New algorithms and methods to estimate maximum-likelihood phylogenies: assessing the performance of PhyML 3.0. *Syst Biol.* 2010;59(3):307–21.
9. Lemoine F, Correia D, Lefort V, Doppelt-Azeroual O, Mareuil F, Cohen-Boulakia S, et al. NGPhylogeny.fr: new generation phylogenetic services for non-specialists. *Nucleic Acids Res.* 2019;47(W1):W260–5.
10. Vervoort M, Renard E. Alignment bHLH domains. Zenodo; 2022. <https://zenodo.org/record/7473983>.
11. Quevillon E, Silventoinen V, Pillai S, Harte N, Mulder N, Apweiler R, et al. InterProScan: protein domains identifier. *Nucleic Acids Res.* 2005;33:W116–120.
12. Edgar RC. MUSCLE: multiple sequence alignment with high accuracy and high throughput. *Nucleic Acids Res.* 2004;32(5):1792–7.
13. Pastrana CC, DeBiasse MB, Ryan JF. Sponges lack ParaHox genes. Piontkivska H, editor. *Genome Biology and Evolution.* 2019. <https://academic.oup.com/gbe/advance-article/doi/10.1093/gbe/evz052/5374758>.
14. Renard E. alignment of homeodomains of transcription factors of the ANTP family. Zenodo; 2022. <https://zenodo.org/record/7494952>.
15. Katoh K, Misawa K, Kuma K ichi, Miyata T. MAFFT: a novel method for rapid multiple sequence alignment based on fast Fourier transform. *Nucleic Acids Res.* 2002;30(14):3059–66.
16. Capella-Gutiérrez S, Silla-Martínez JM, Gabaldón T. trimAl: a tool for automated alignment trimming in large-scale phylogenetic analyses. *Bioinformatics.* 2009;25(15):1972–3.
17. Lefort V, Longueville JE, Gascuel O. SMS: Smart Model Selection in PhyML. *Mol Biol Evol.* 2017;34(9):2422–4.

18. Kumar S, Stecher G, Li M, Knyaz C, Tamura K. MEGA X: Molecular Evolutionary Genetics Analysis across Computing Platforms. *Mol Biol Evol.* 2018;35(6):1547-9.
19. Leys S. Alignment used for voltage gated ion channels phylogenetic analysis. Zenodo; 2023.  
<https://zenodo.org/record/7534934>
20. Leys S. alignment of potassium channels sequences. Zenodo; 2023.  
<https://zenodo.org/record/7534942>
